# Supplementary material
Source: PubMed Central journal article supplement (PMC4126512)
Supplement: NIHMS603609-supplement-Suppl_Data2.pdf [file NIHMS603609-supplement-Suppl_Data2.pdf]

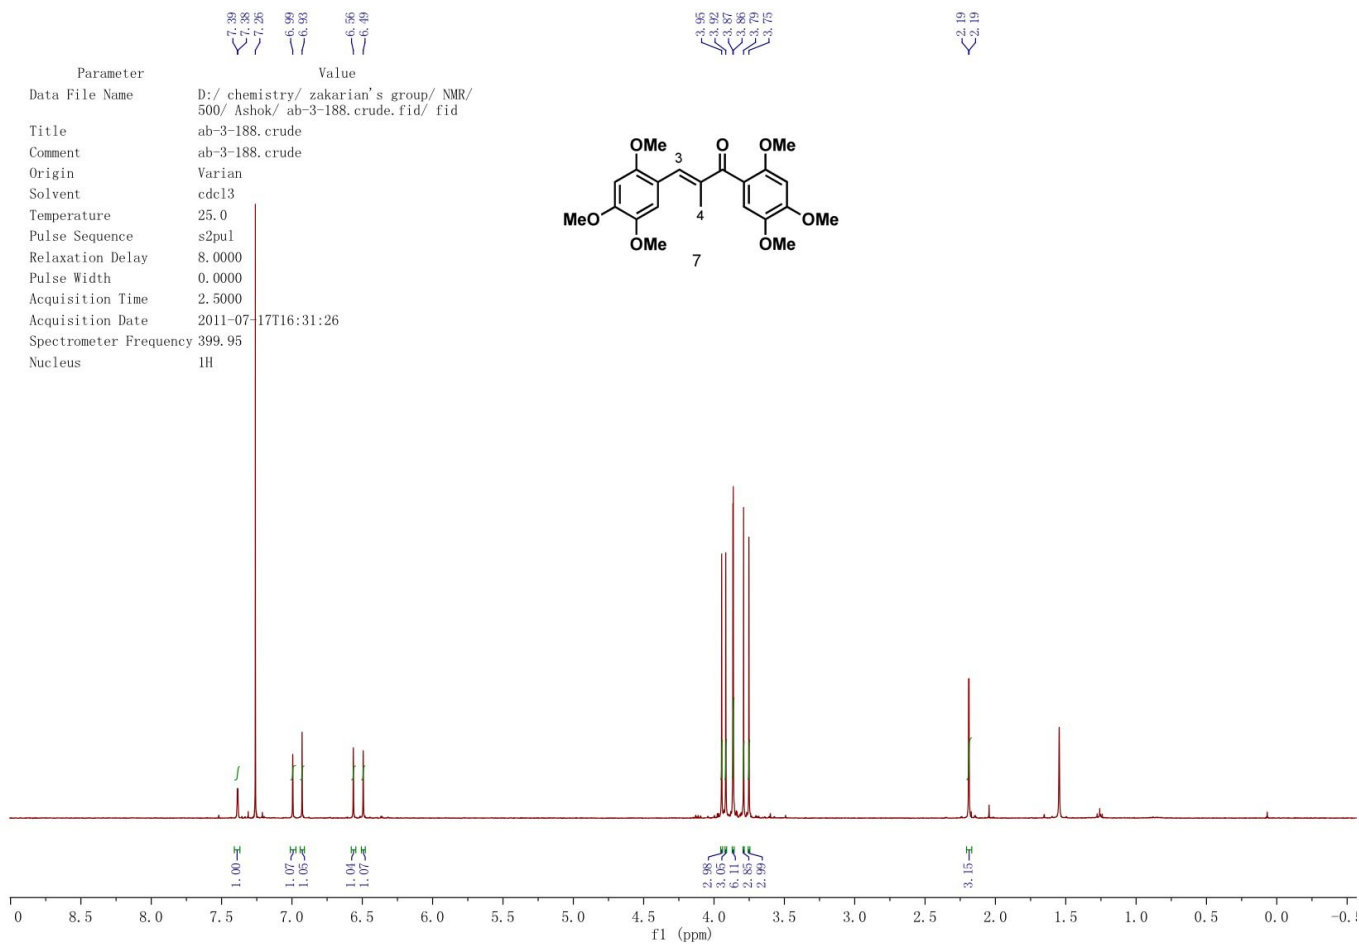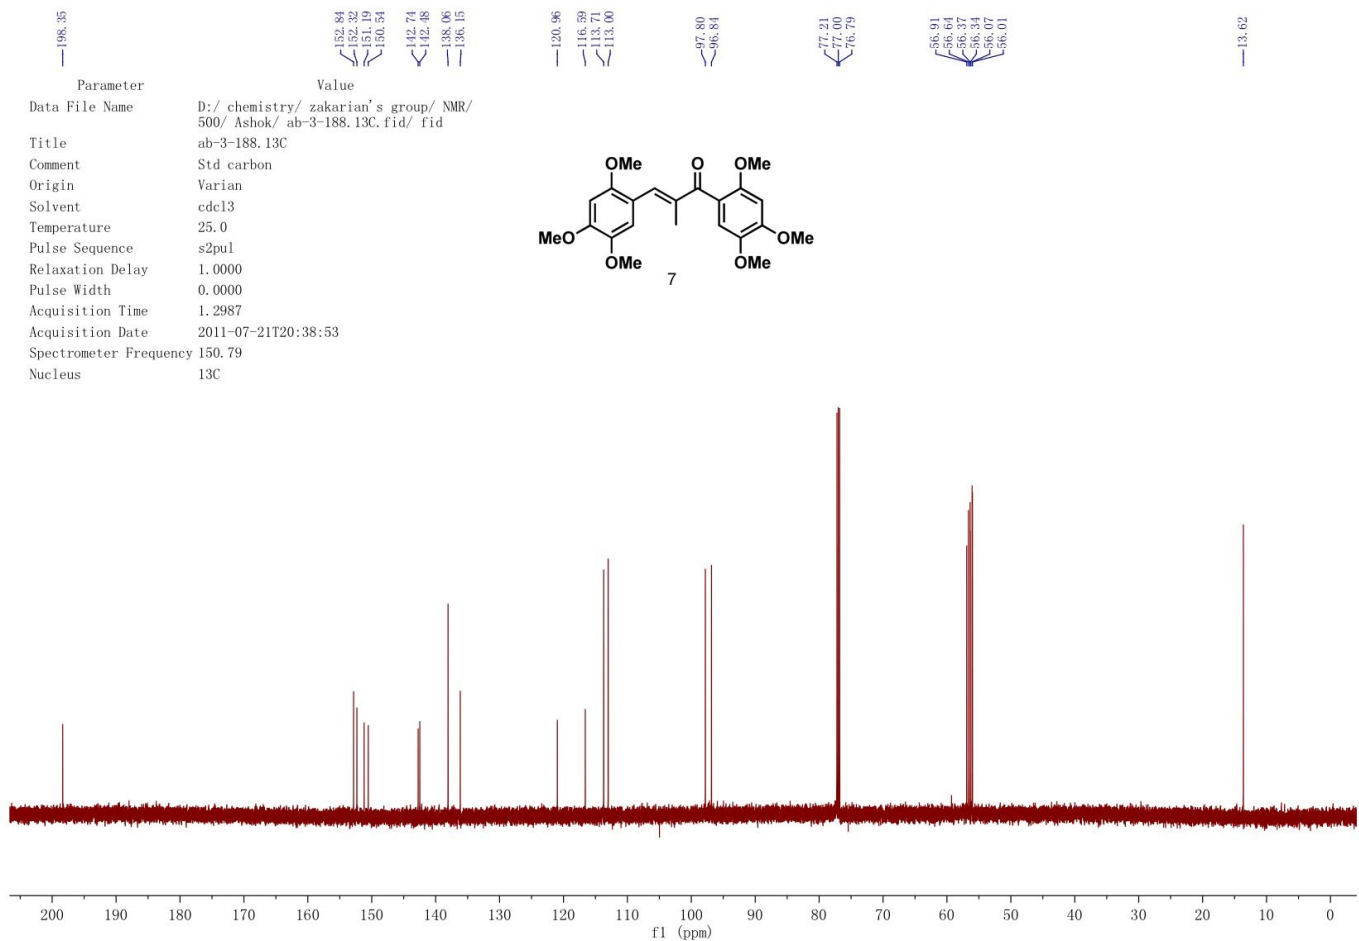

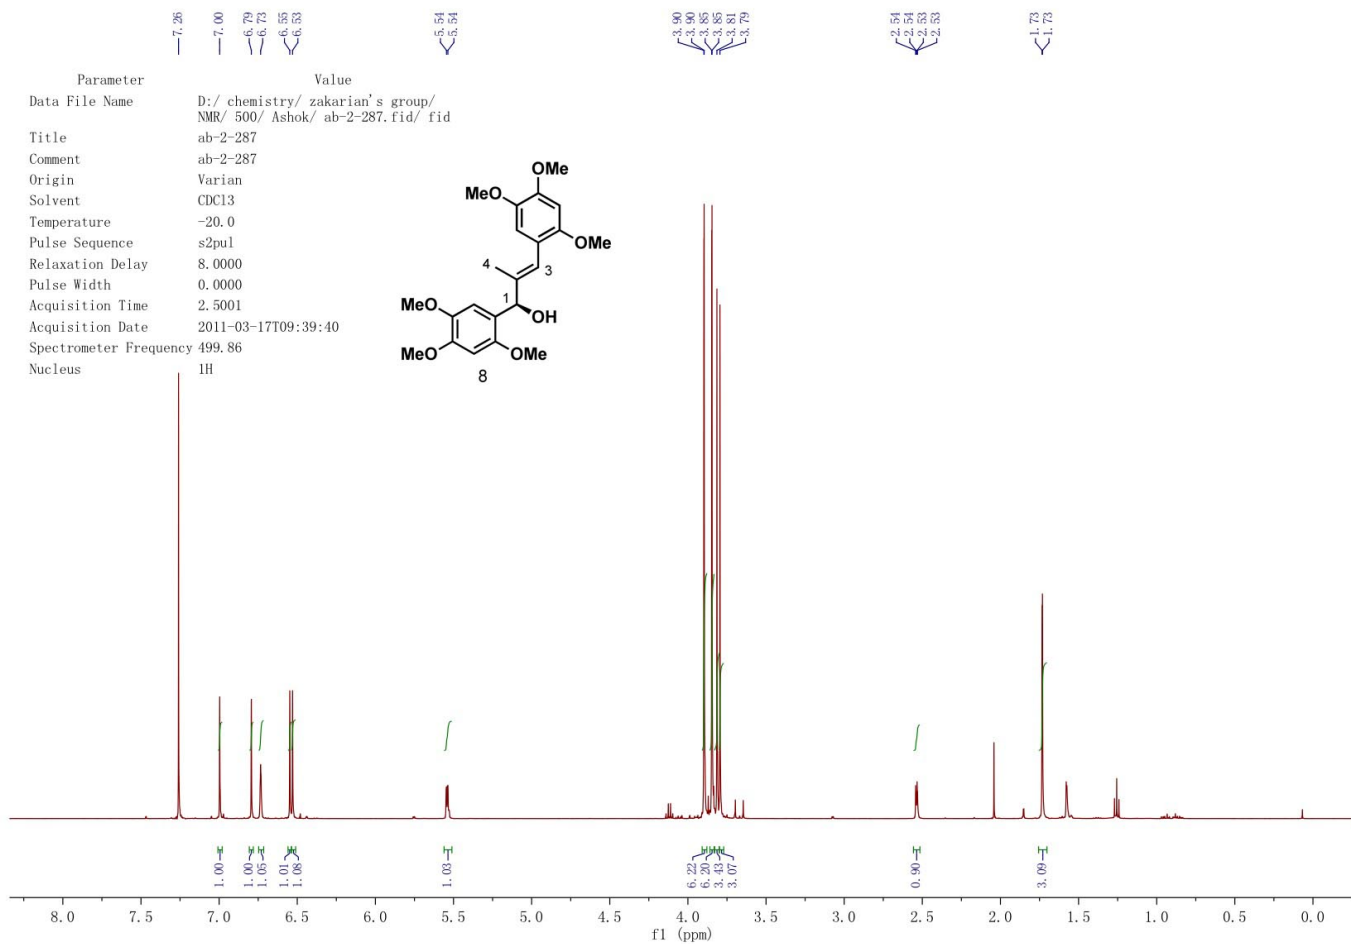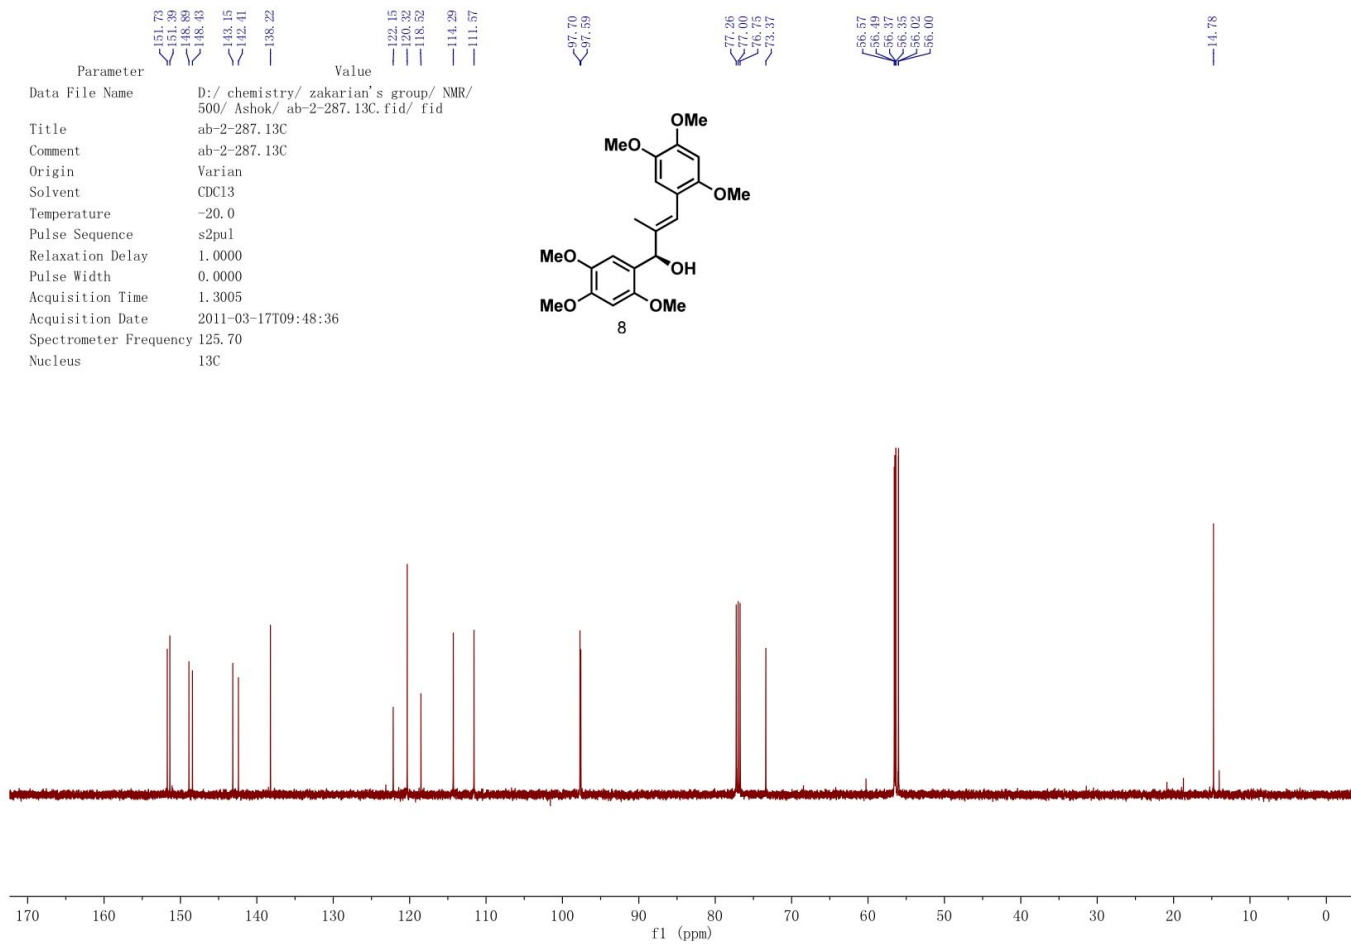

### ==== Shimadzu LCsolution Analysis Report ====

C:\LabSolutions\Data\lab\ab-3-097-03.lcd

Acquired by : Admin  
 Sample Name : ab-3-139  
 Sample ID : ab-3-139  
 Vial # :  
 Injection Volume : 25 uL  
 Data File Name : ab-3-097-03.lcd  
 Method File Name : ces-OD-H-analytical 0.46cm x 25cm.lcm  
 Batch File Name :  
 Report File Name : Default.lcr  
 Data Acquired : 6/11/2011 3:55:22 PM  
 Data Processed : 6/11/2011 4:37:44 PM

<Chromatogram>

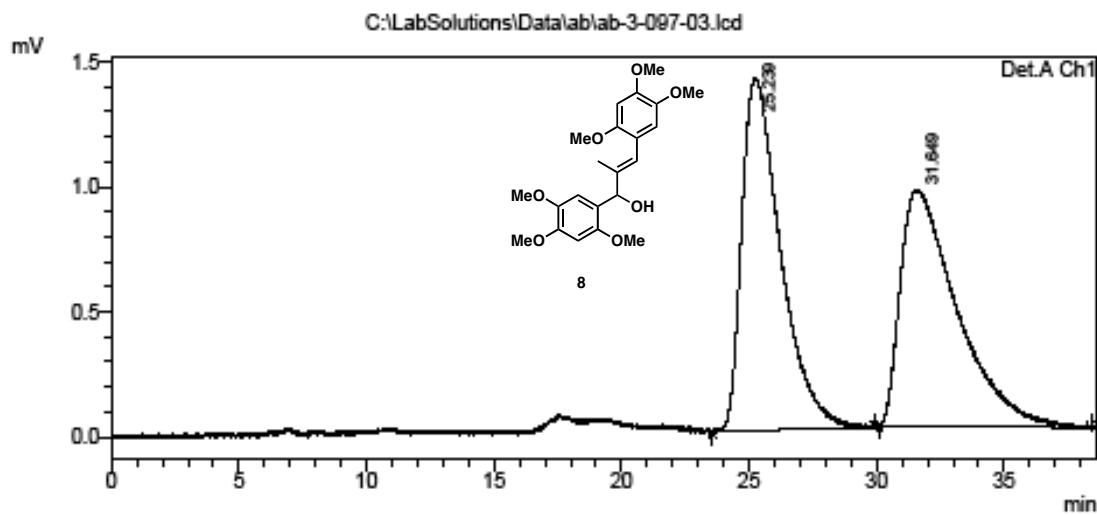

1 Det.A Ch1/275nm

PeakTable

| Peak# | Ret. Time | Area   | Height | Area %  | Height % |
|-------|-----------|--------|--------|---------|----------|
| 1     | 25.239    | 149571 | 1409   | 50.601  | 59.885   |
| 2     | 31.649    | 148019 | 944    | 49.399  | 40.115   |
| Total |           | 295590 | 2353   | 100.000 | 100.000  |

### ==== Shimadzu LCsolution Analysis Report ====

C:\LabSolutions\Data\lab\lab-3-193.lcd

Acquired by : Admin  
 Sample Name : ab-3-193  
 Sample ID : ab-3-193  
 Vail # :  
 Injection Volume : 25 uL  
 Data File Name : ab-3-193.lcd  
 Method File Name : ces-OD-H-analytical 0.46cm x 25cm.lcm  
 Batch File Name :  
 Report File Name : Default.lcr  
 Data Acquired : 7/21/2011 5:44:58 PM  
 Data Processed : 7/21/2011 6:34:01 PM

#### <Chromatogram>

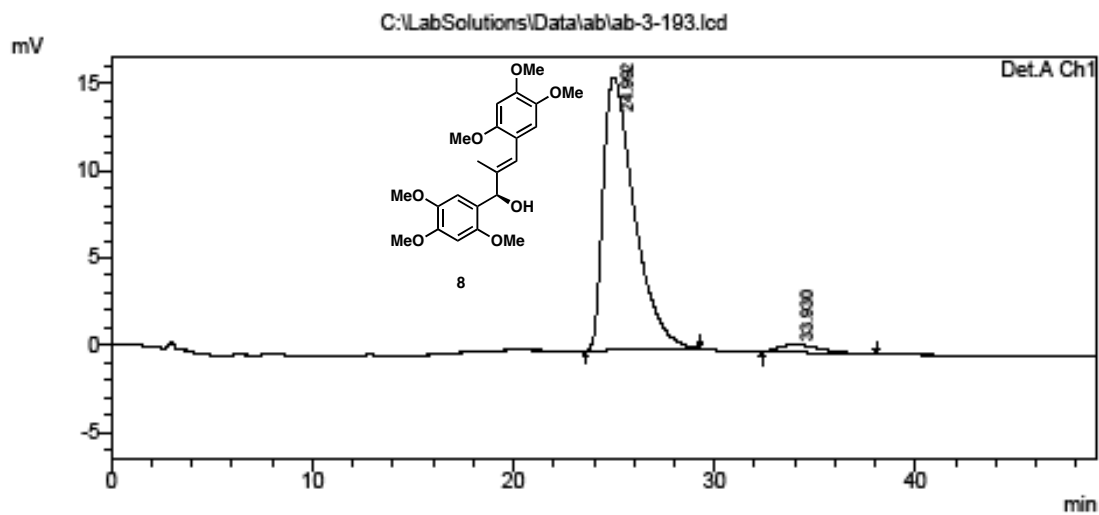

1 Det.A Ch1/215nm

PeakTable

| Peak# | Ret. Time | Area    | Height | Area %  | Height % |
|-------|-----------|---------|--------|---------|----------|
| 1     | 24.992    | 1689324 | 15639  | 96.437  | 97.213   |
| 2     | 33.930    | 62407   | 448    | 3.563   | 2.787    |
| Total |           | 1751731 | 16087  | 100.000 | 100.000  |

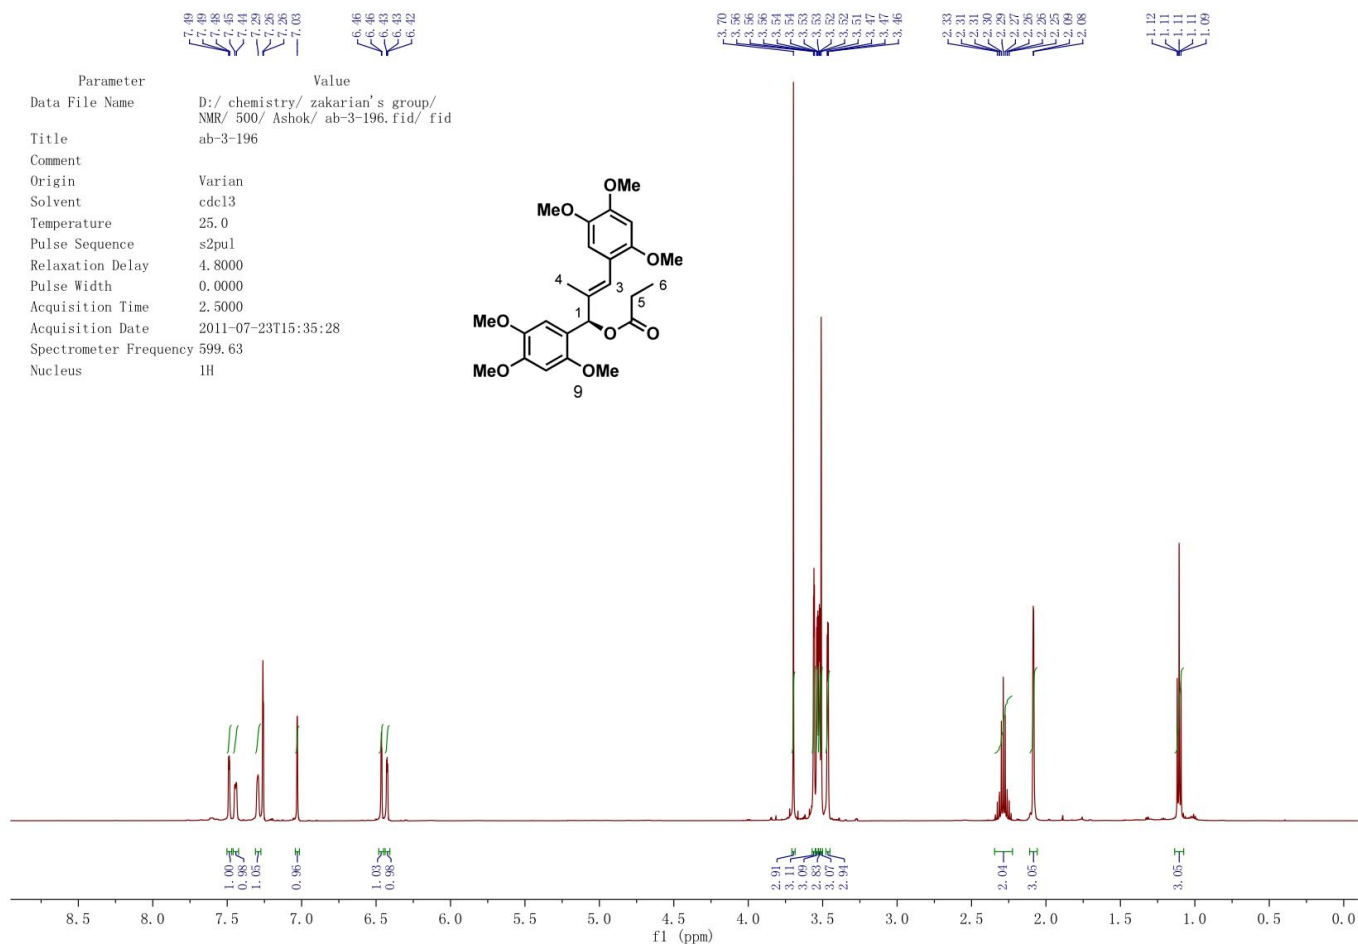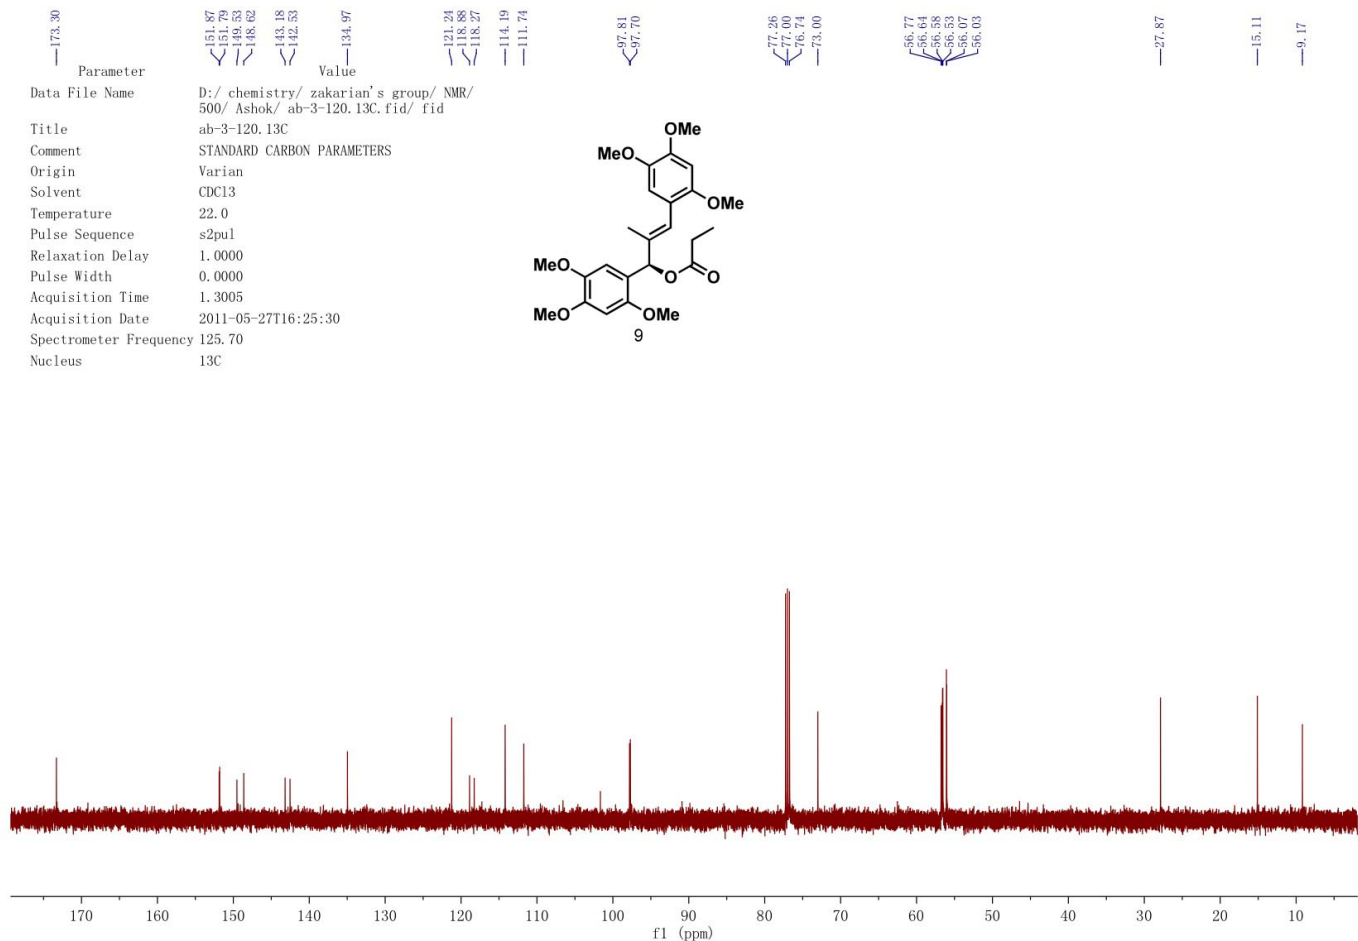

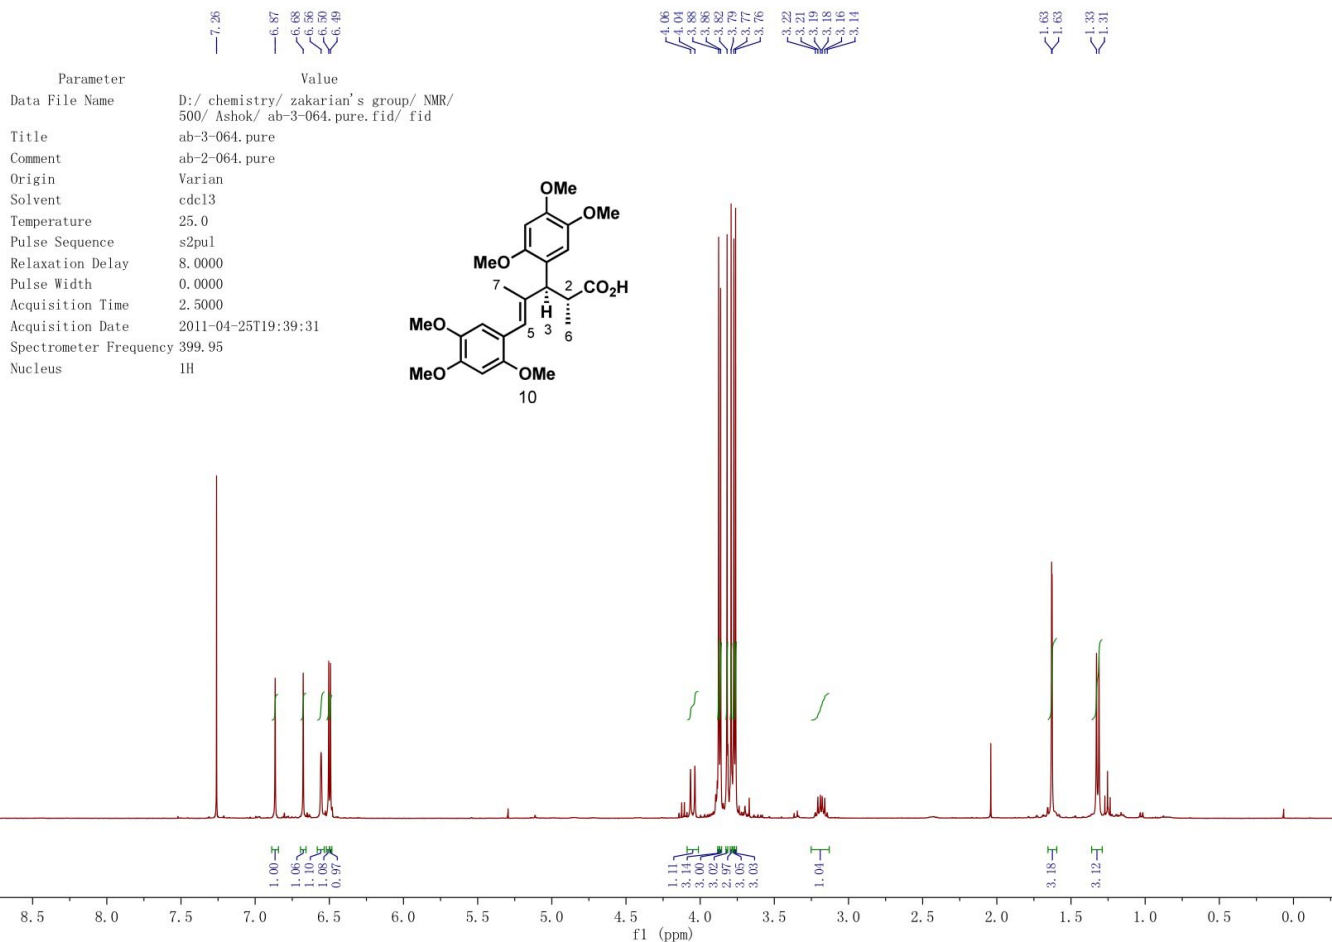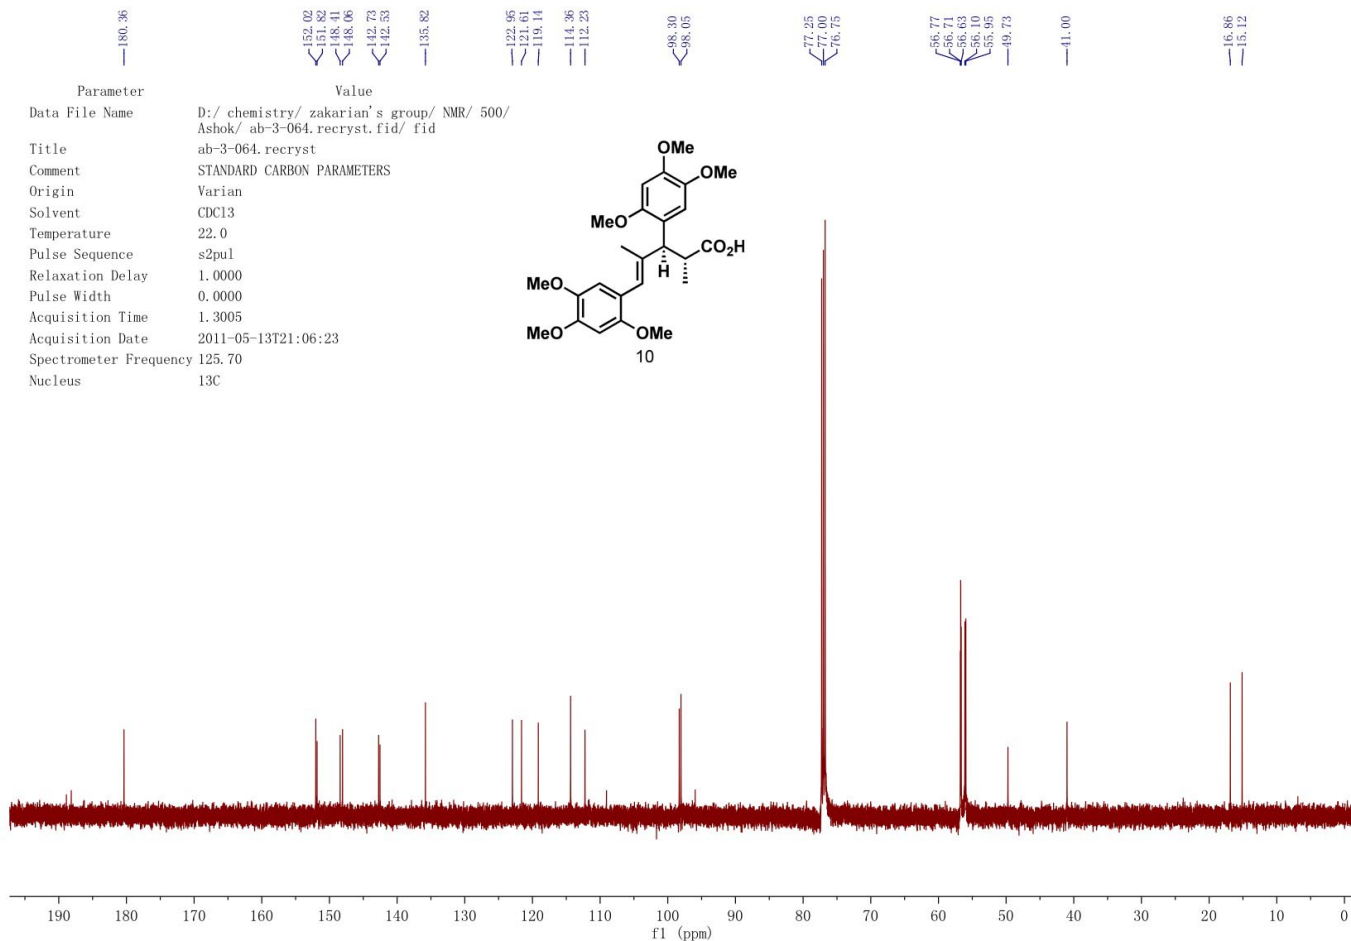

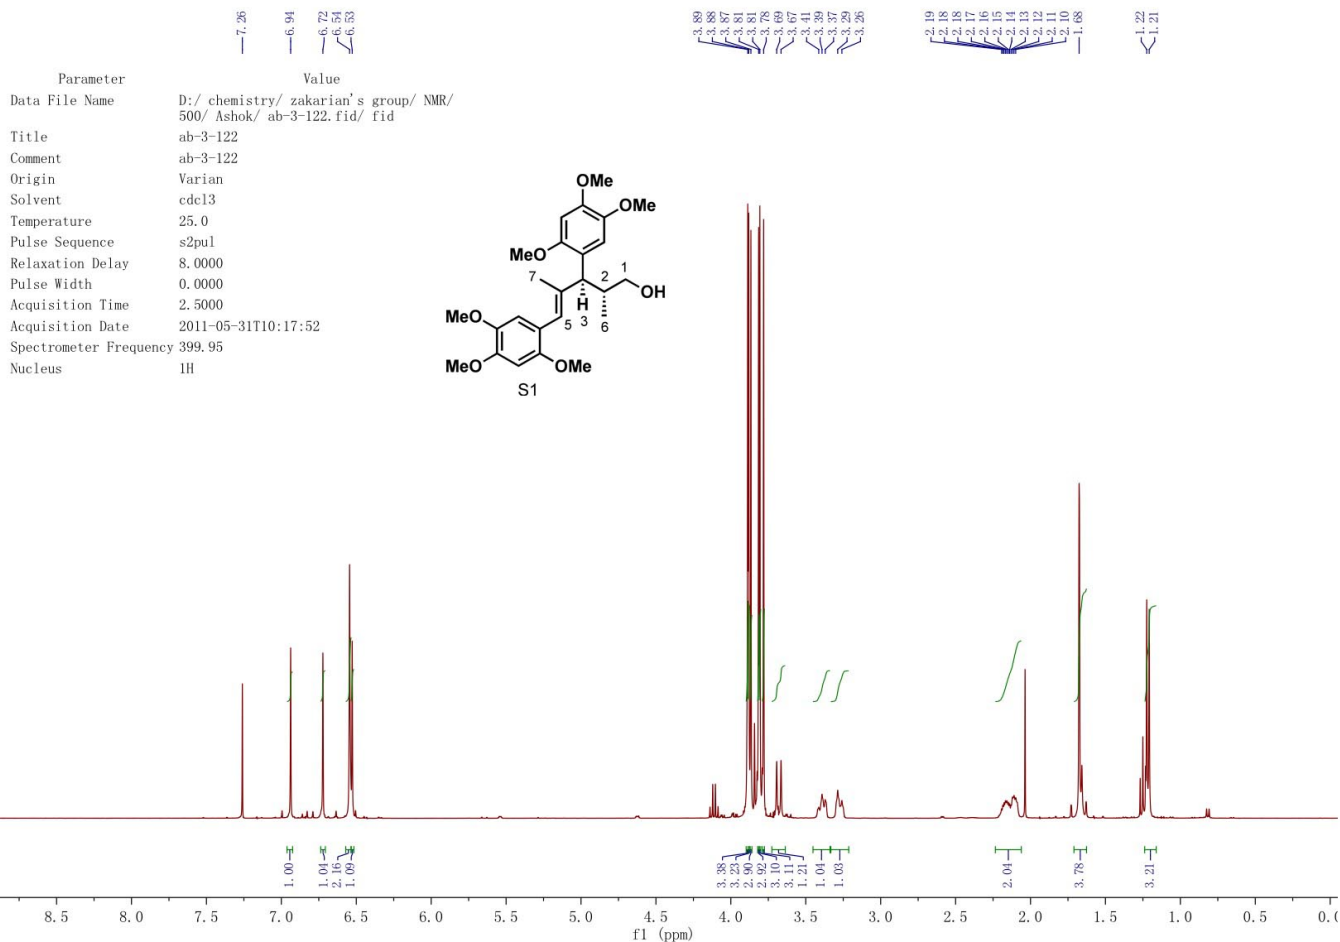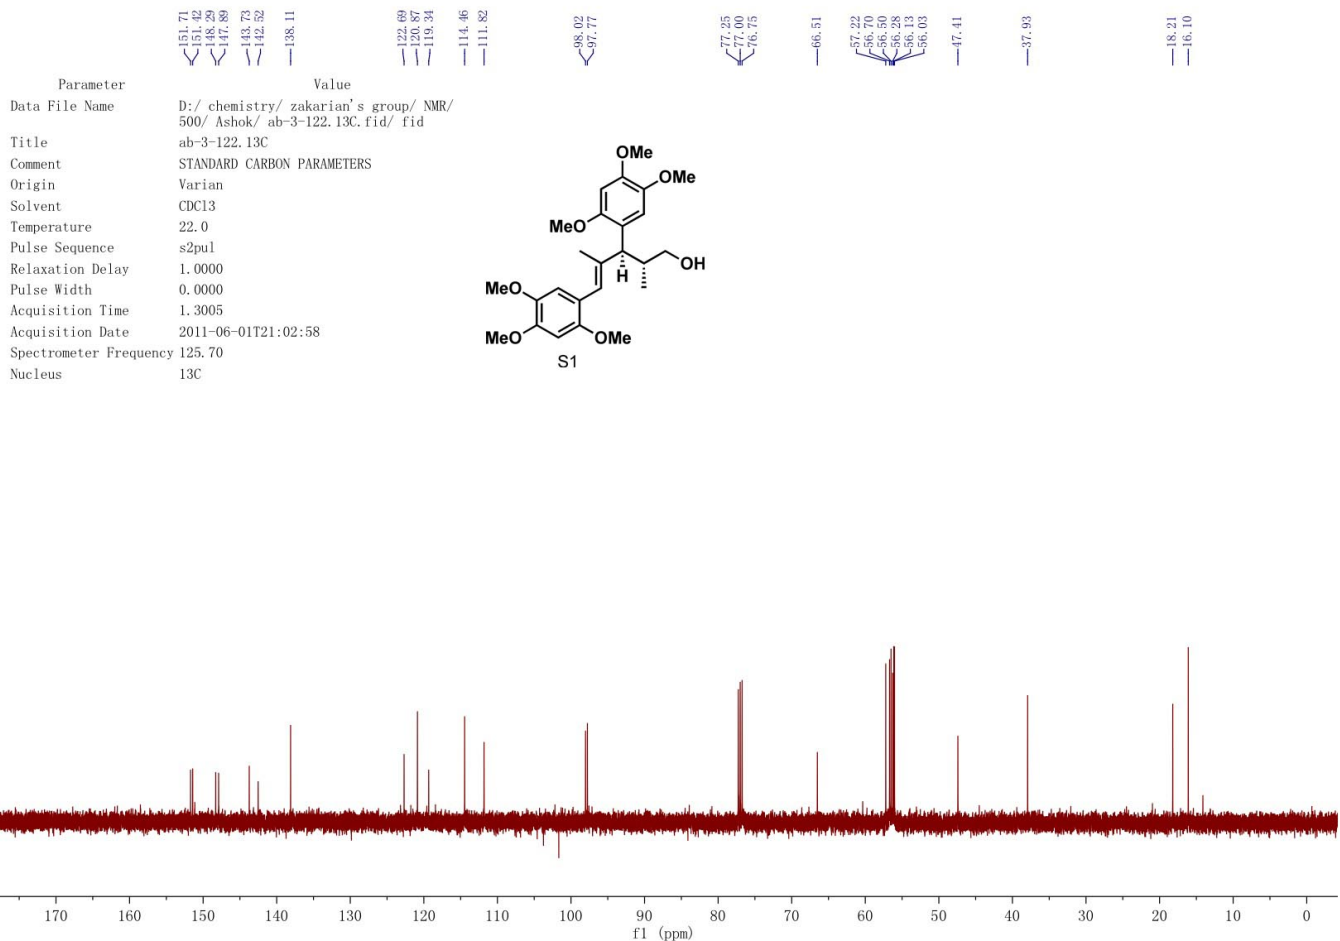

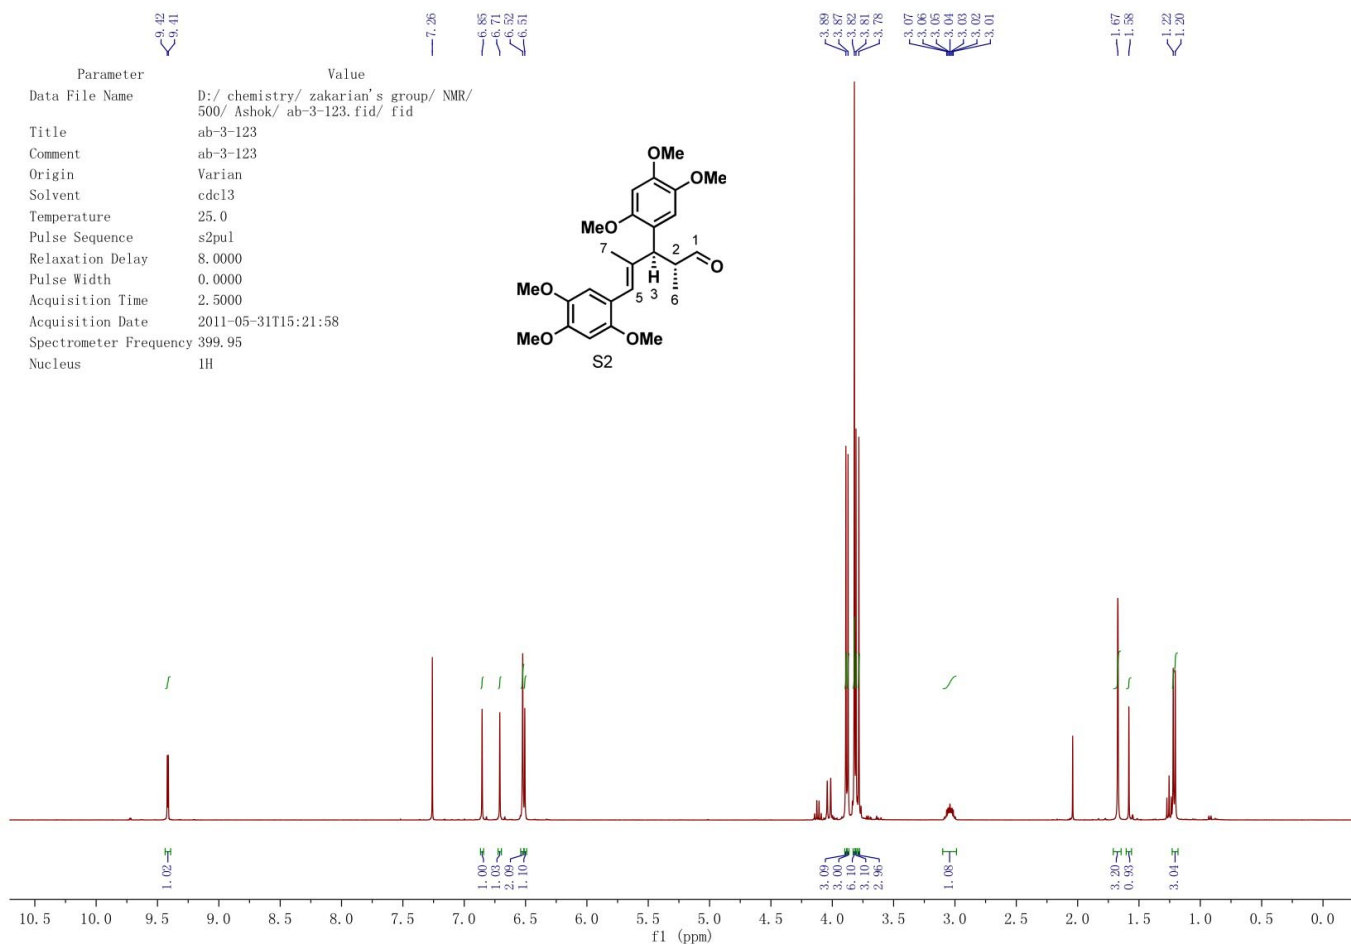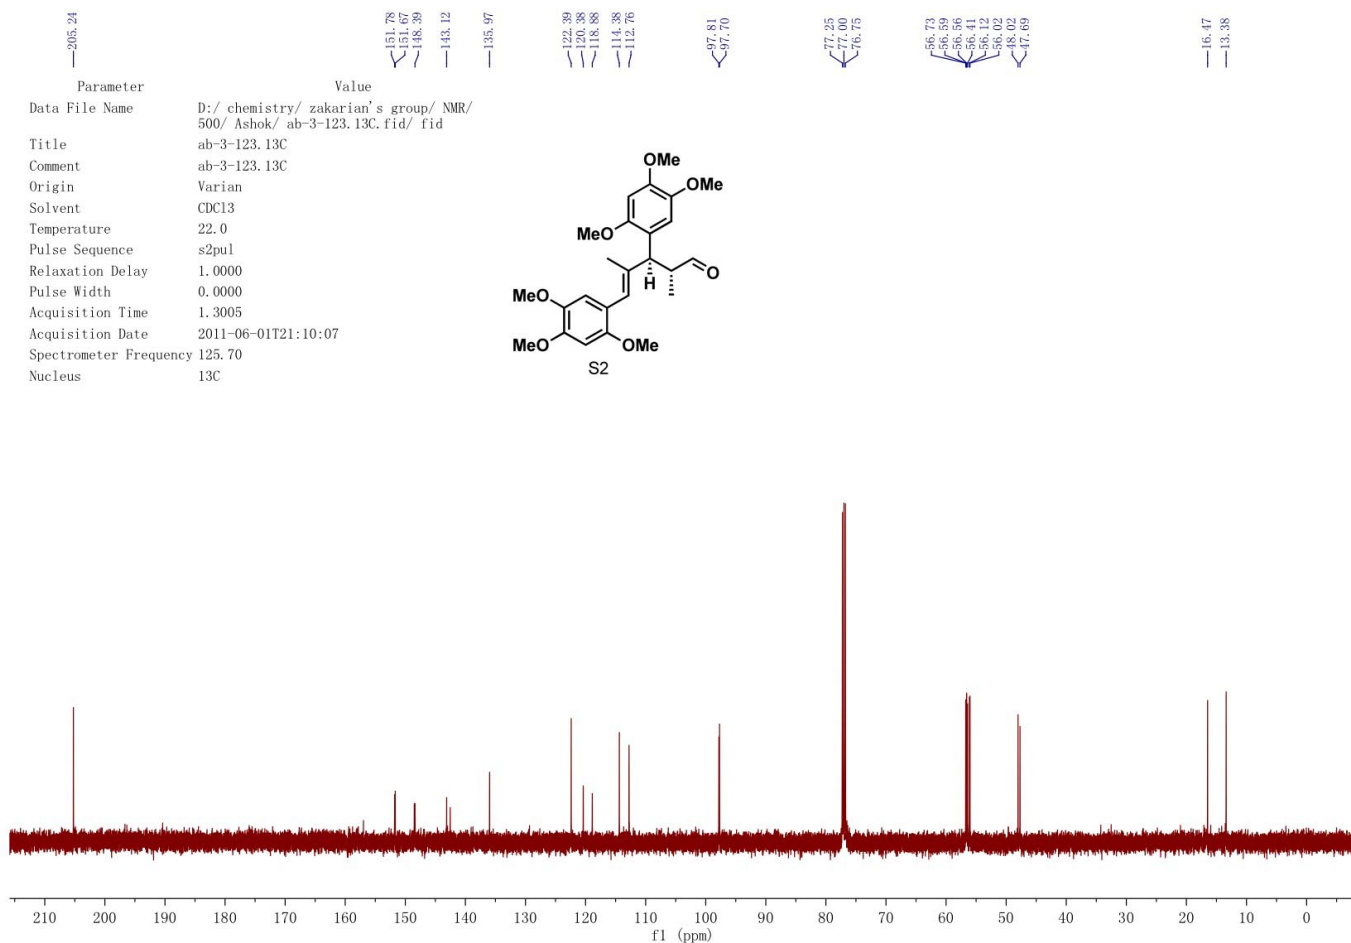



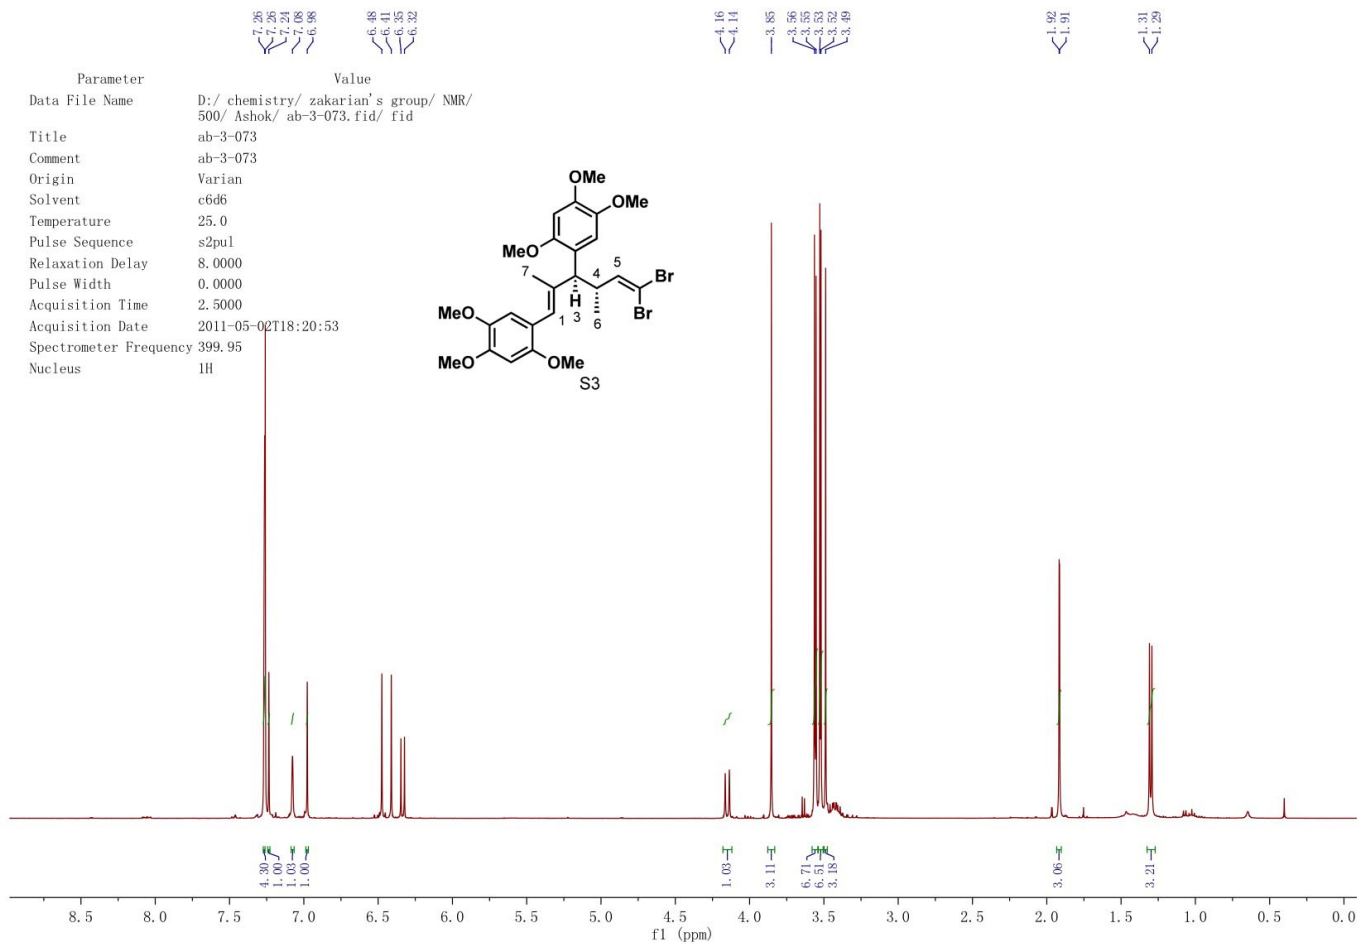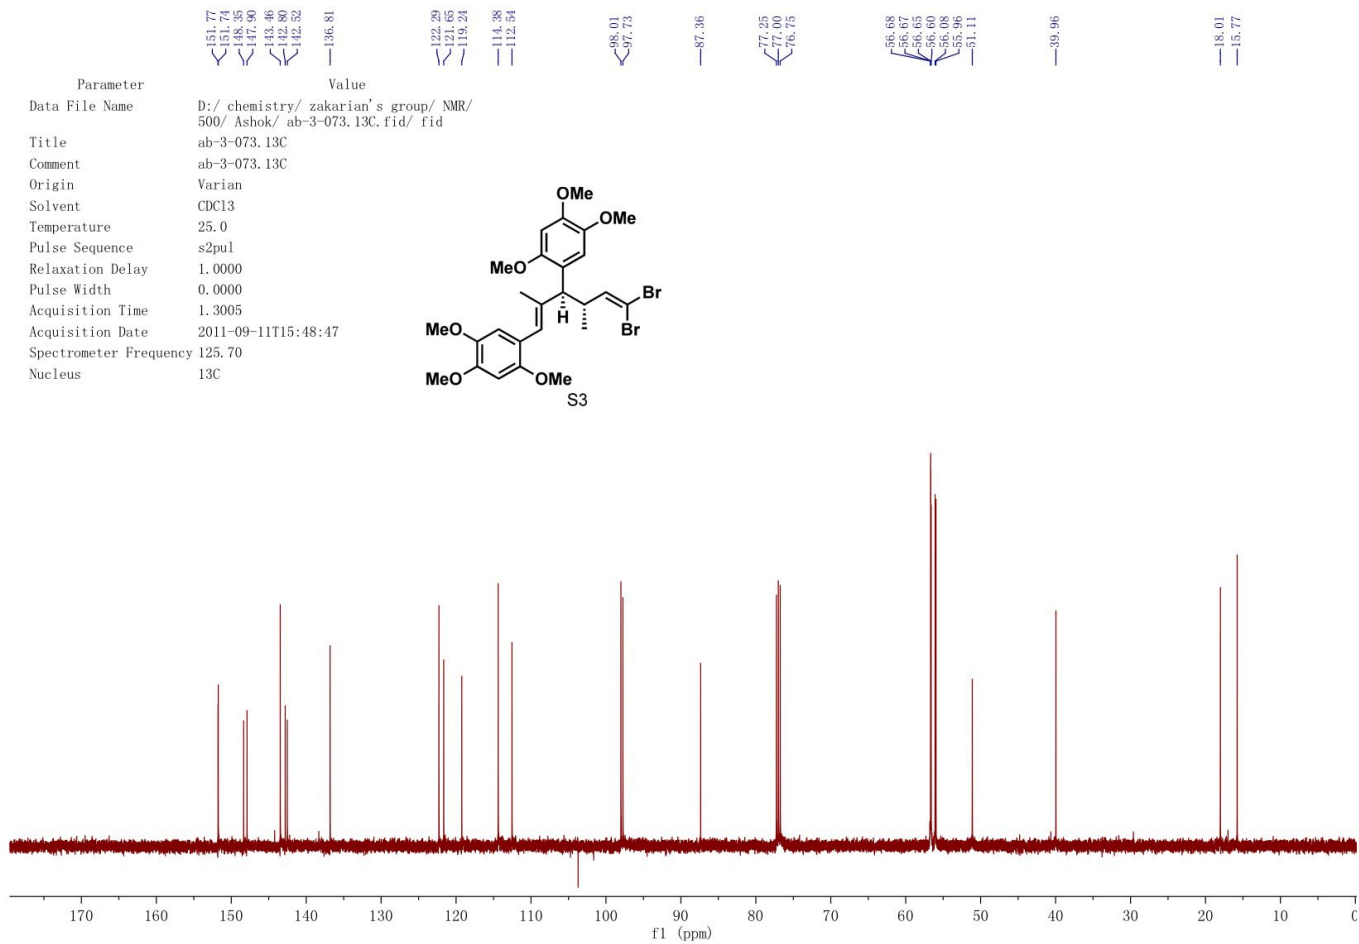

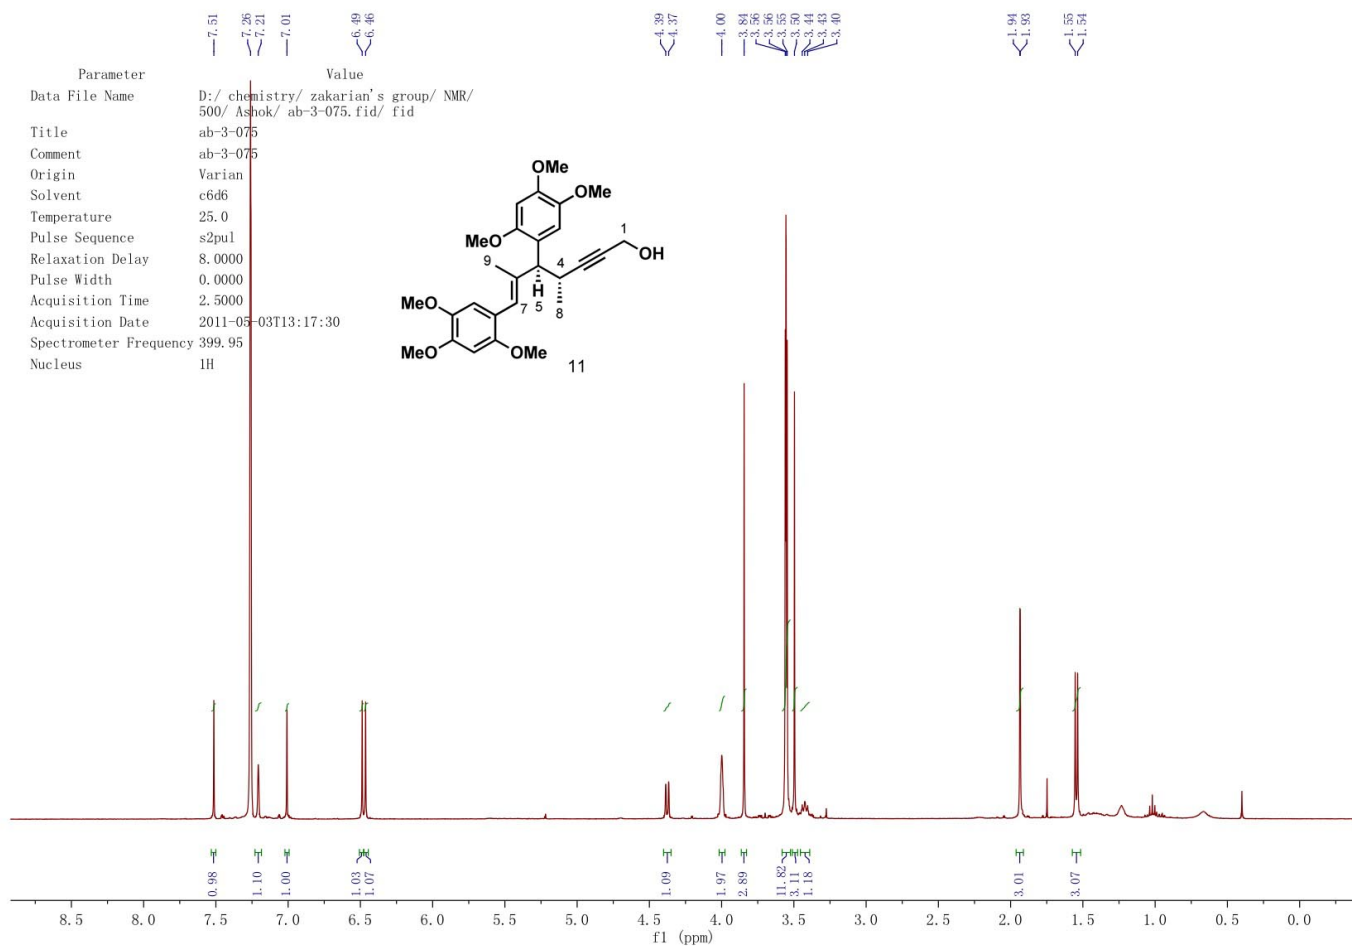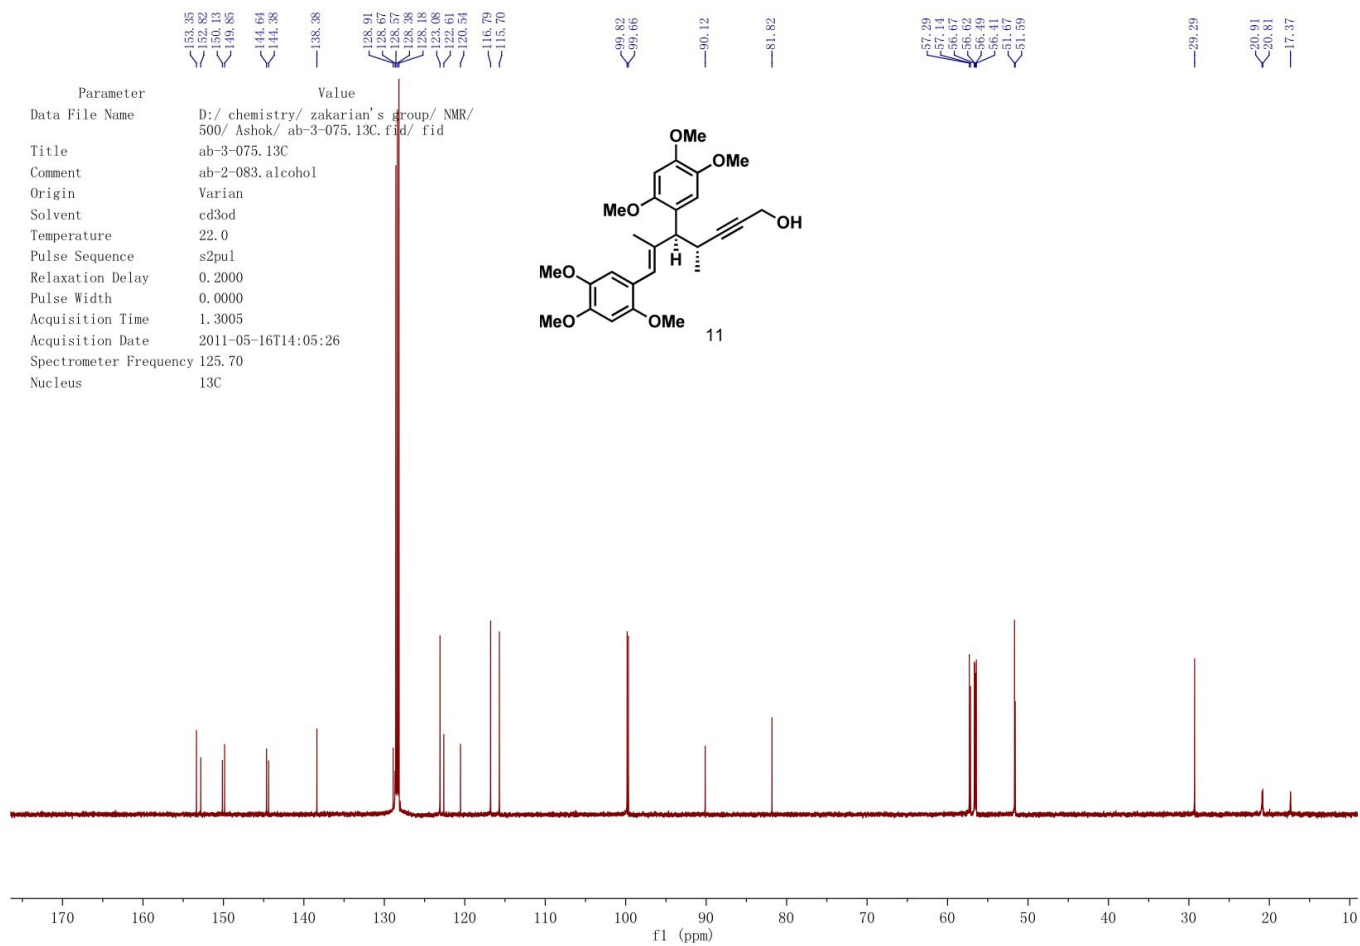

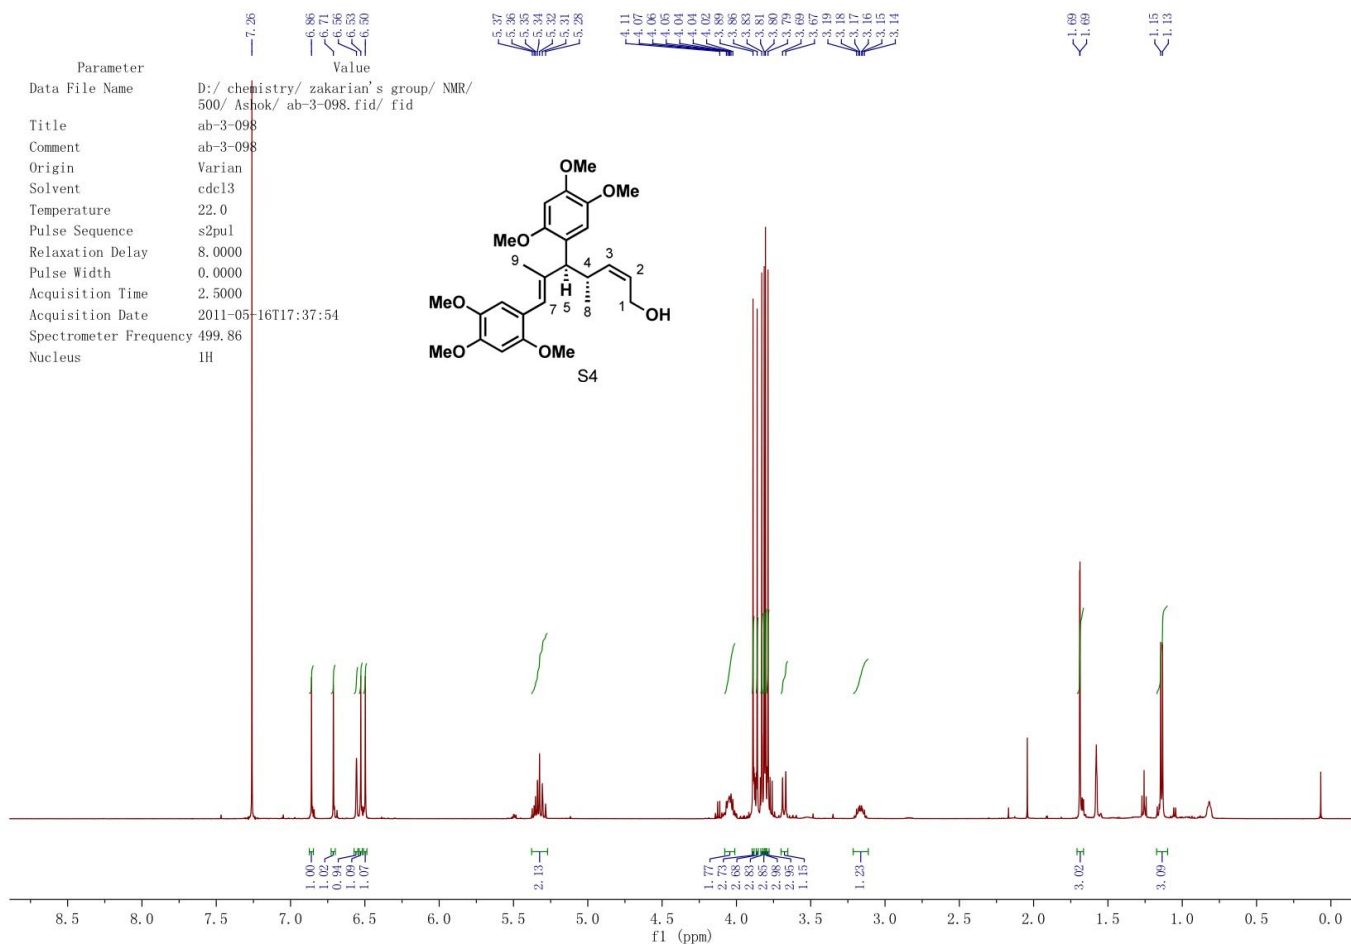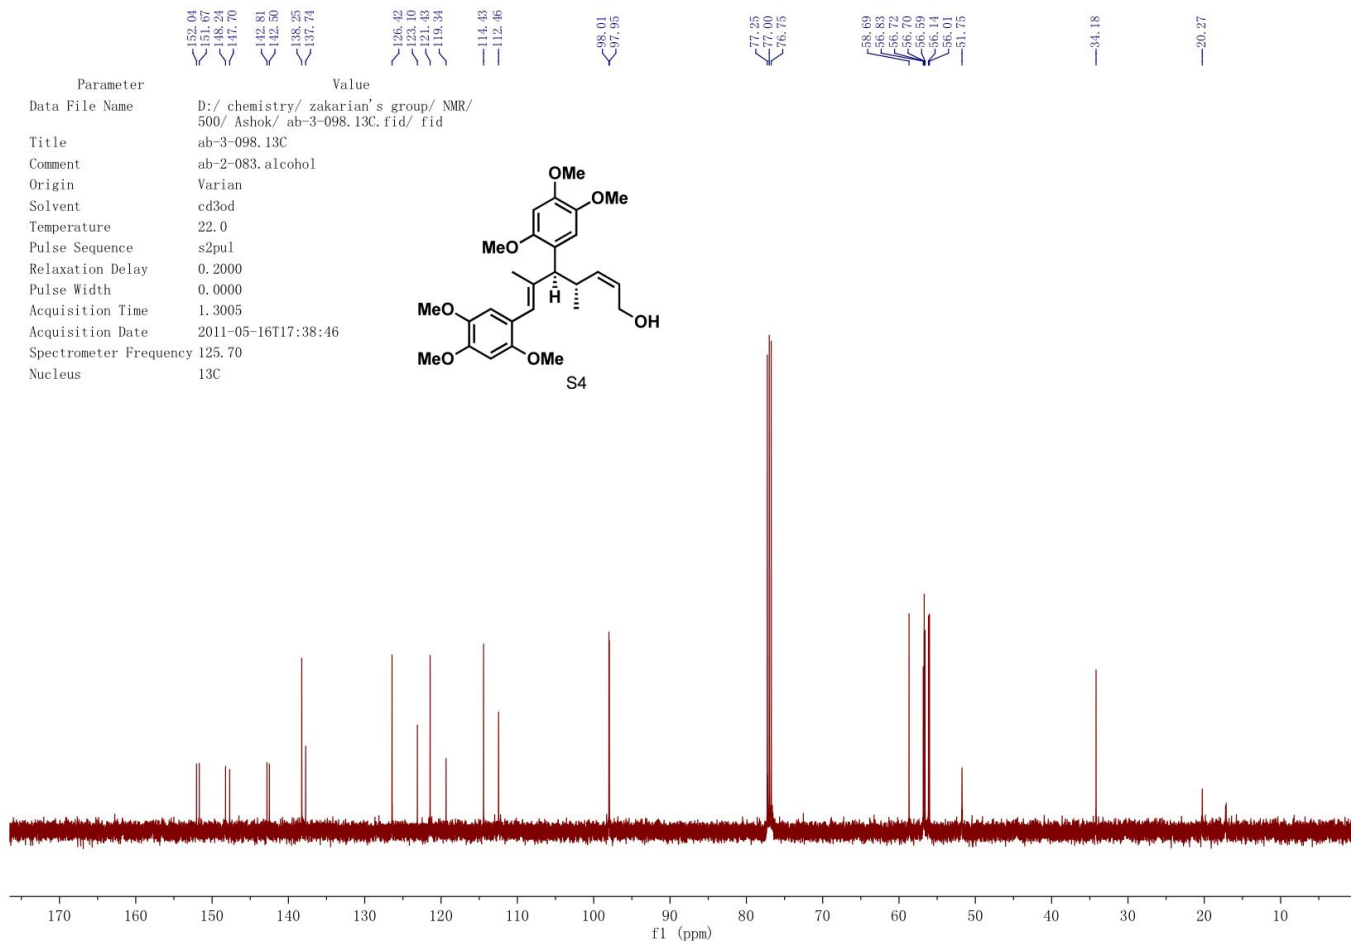

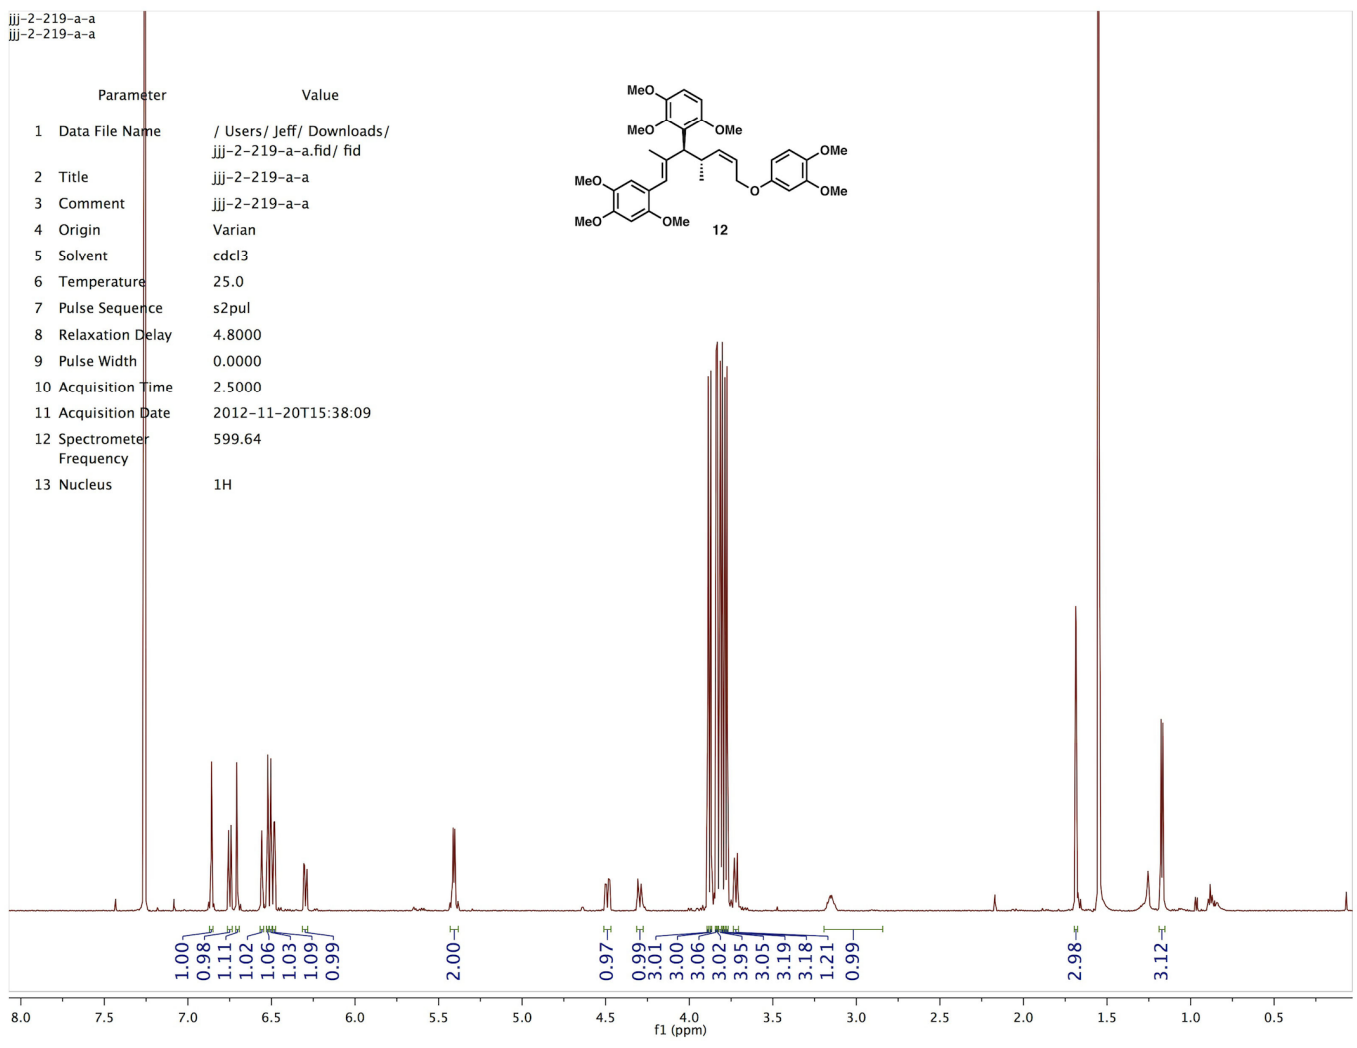

153.23  
151.97  
151.66  
149.79  
147.69  
143.83  
142.73  
142.46  
138.76  
137.70  
123.29  
122.83  
121.58  
119.31  
114.82  
111.61  
103.57  
102.02  
97.91  
97.81  
77.21  
77.00  
76.79  
64.60  
56.69  
56.47  
56.37  
56.10  
55.92  
55.74  
34.50  
20.12  
16.84

| Parameter              | Value                                                                            |
|------------------------|----------------------------------------------------------------------------------|
| Data File Name         | D:/ chemistry / zakarian's group / NMR / 500 /<br>Ashok / ab-3-128.13C.fid / fid |
| Title                  | ab-3-128.13C                                                                     |
| Comment                | ab-3-128.13C                                                                     |
| Origin                 | Varian                                                                           |
| Solvent                | cdcl3                                                                            |
| Temperature            | 25.0                                                                             |
| Pulse Sequence         | s2pul                                                                            |
| Relaxation Delay       | 1.0000                                                                           |
| Pulse Width            | 0.0000                                                                           |
| Acquisition Time       | 1.2987                                                                           |
| Acquisition Date       | 2011-07-28T21:49:15                                                              |
| Spectrometer Frequency | 150.79                                                                           |
| Nucleus                | <sup>13</sup> C                                                                  |

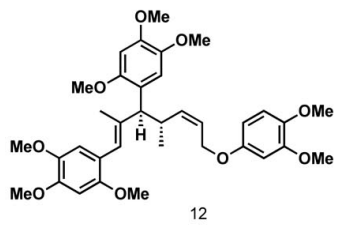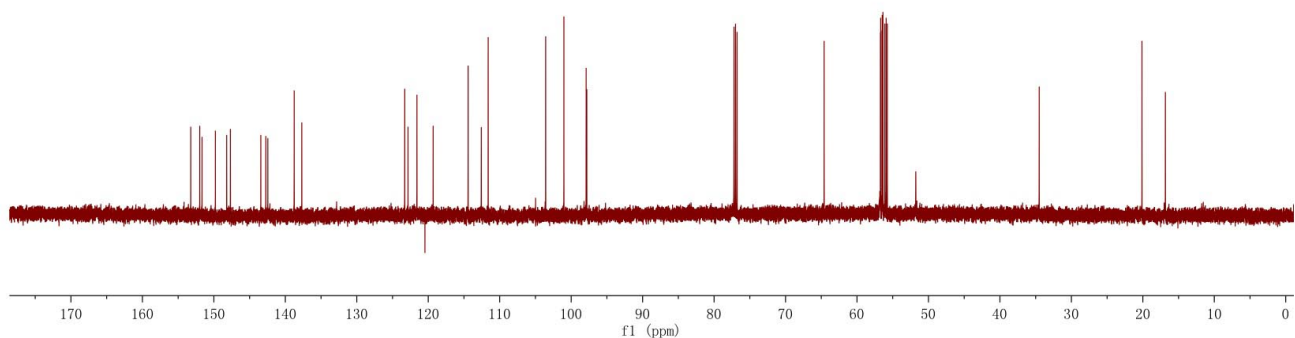

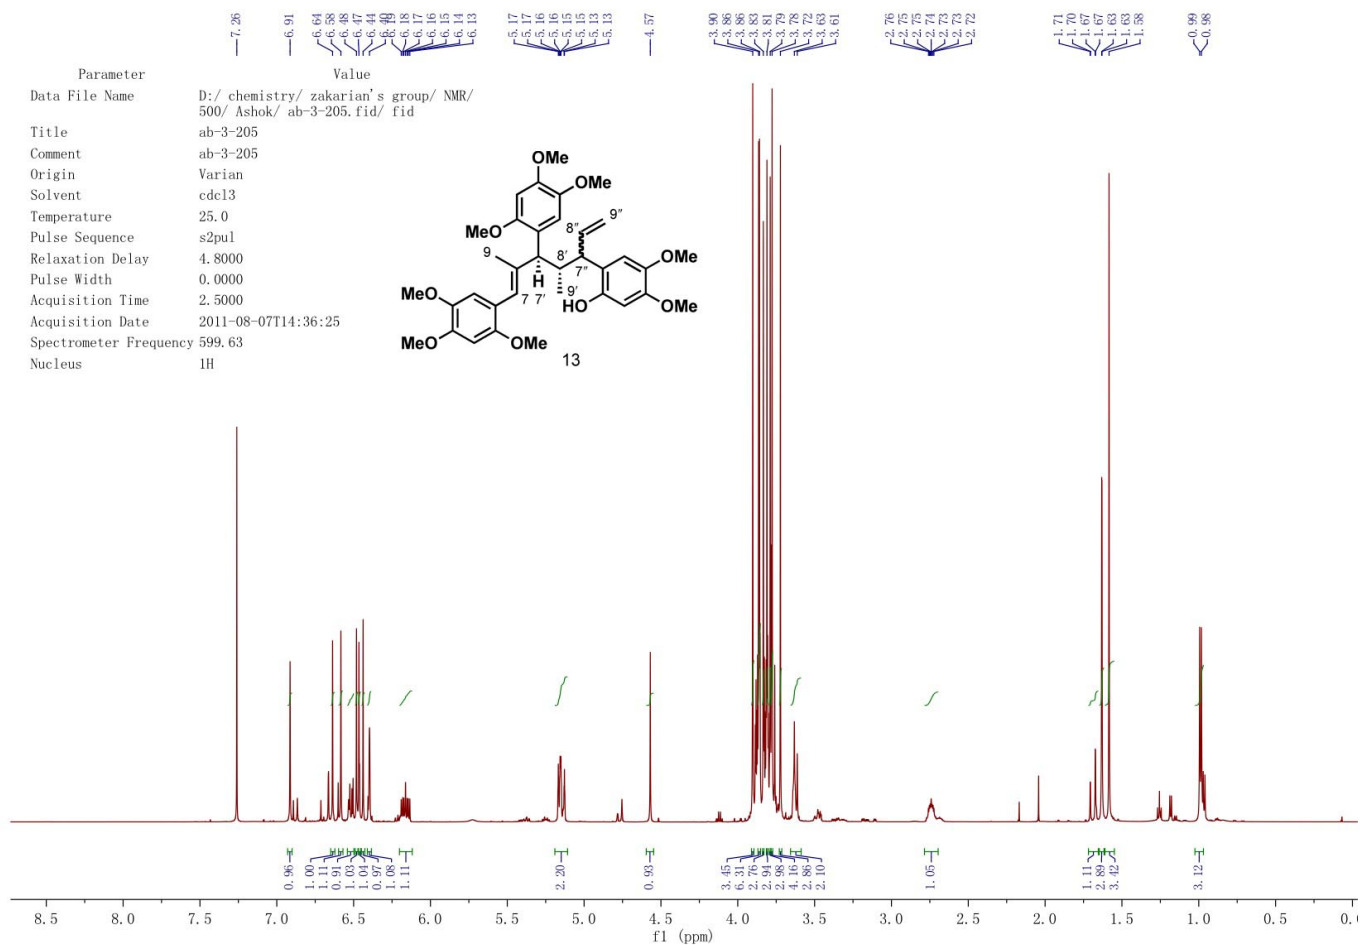

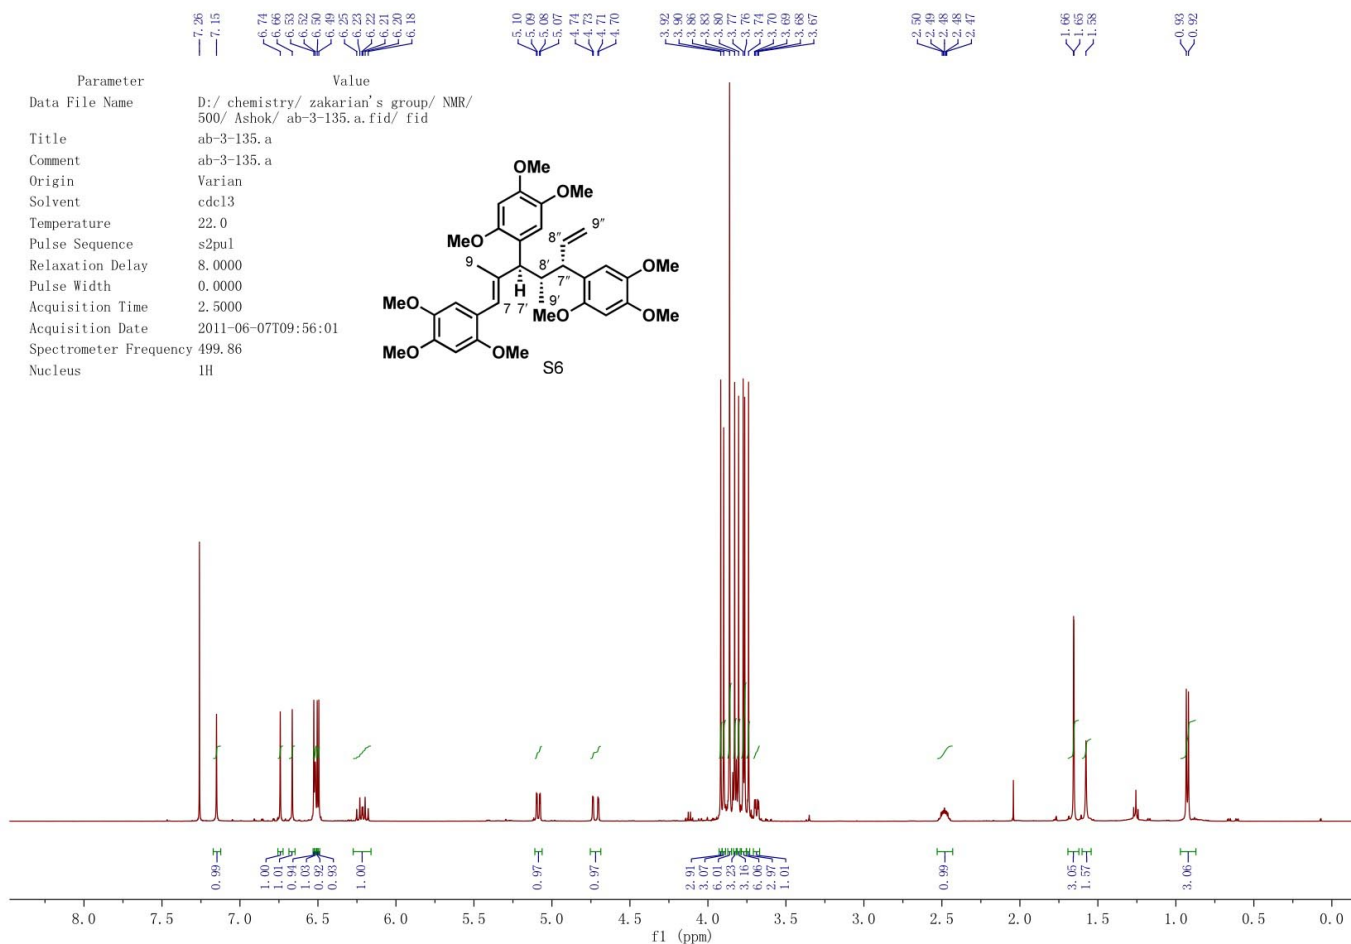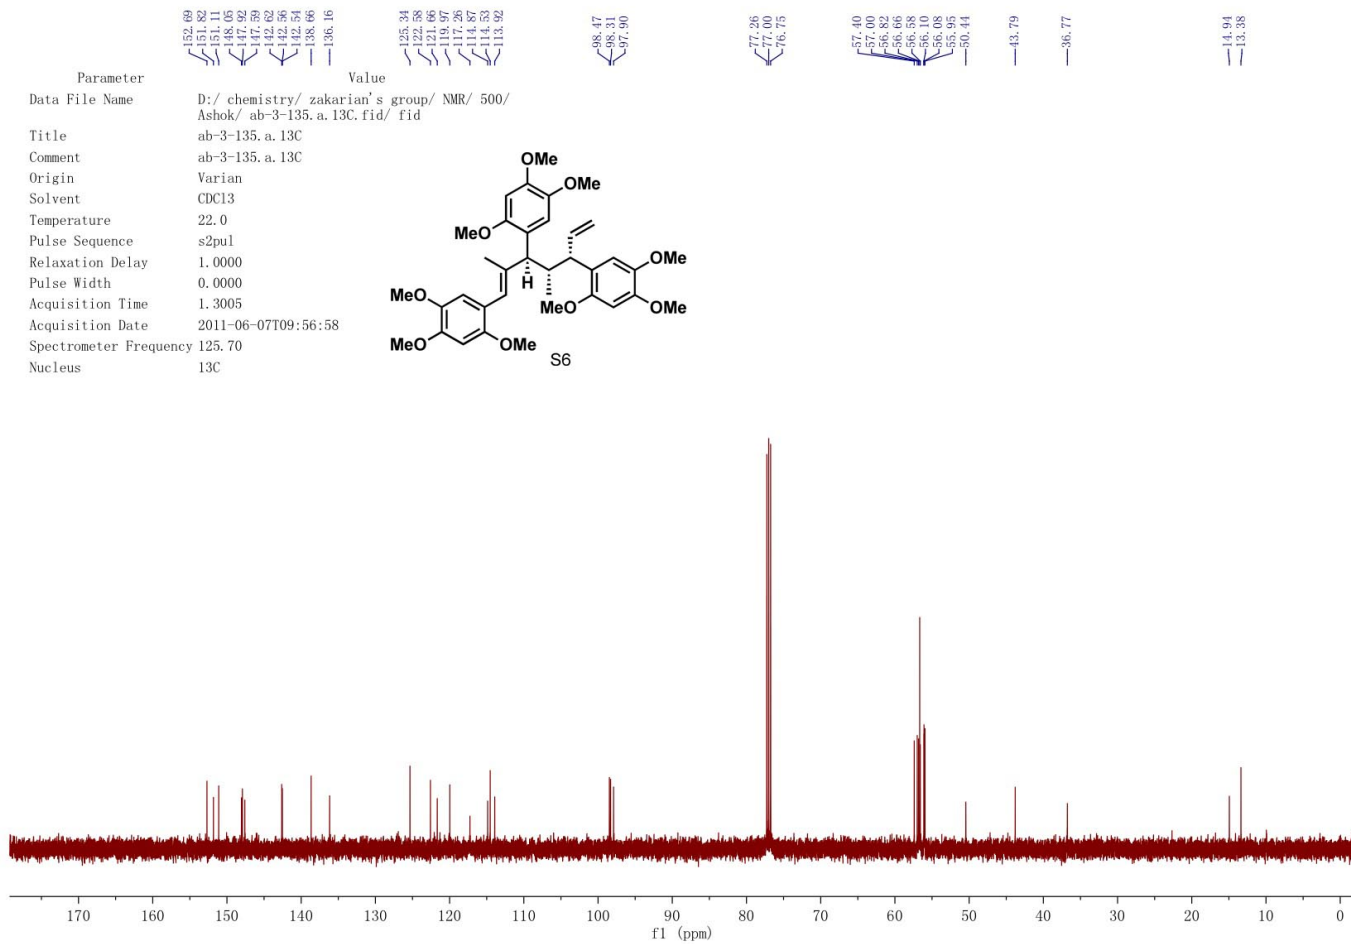

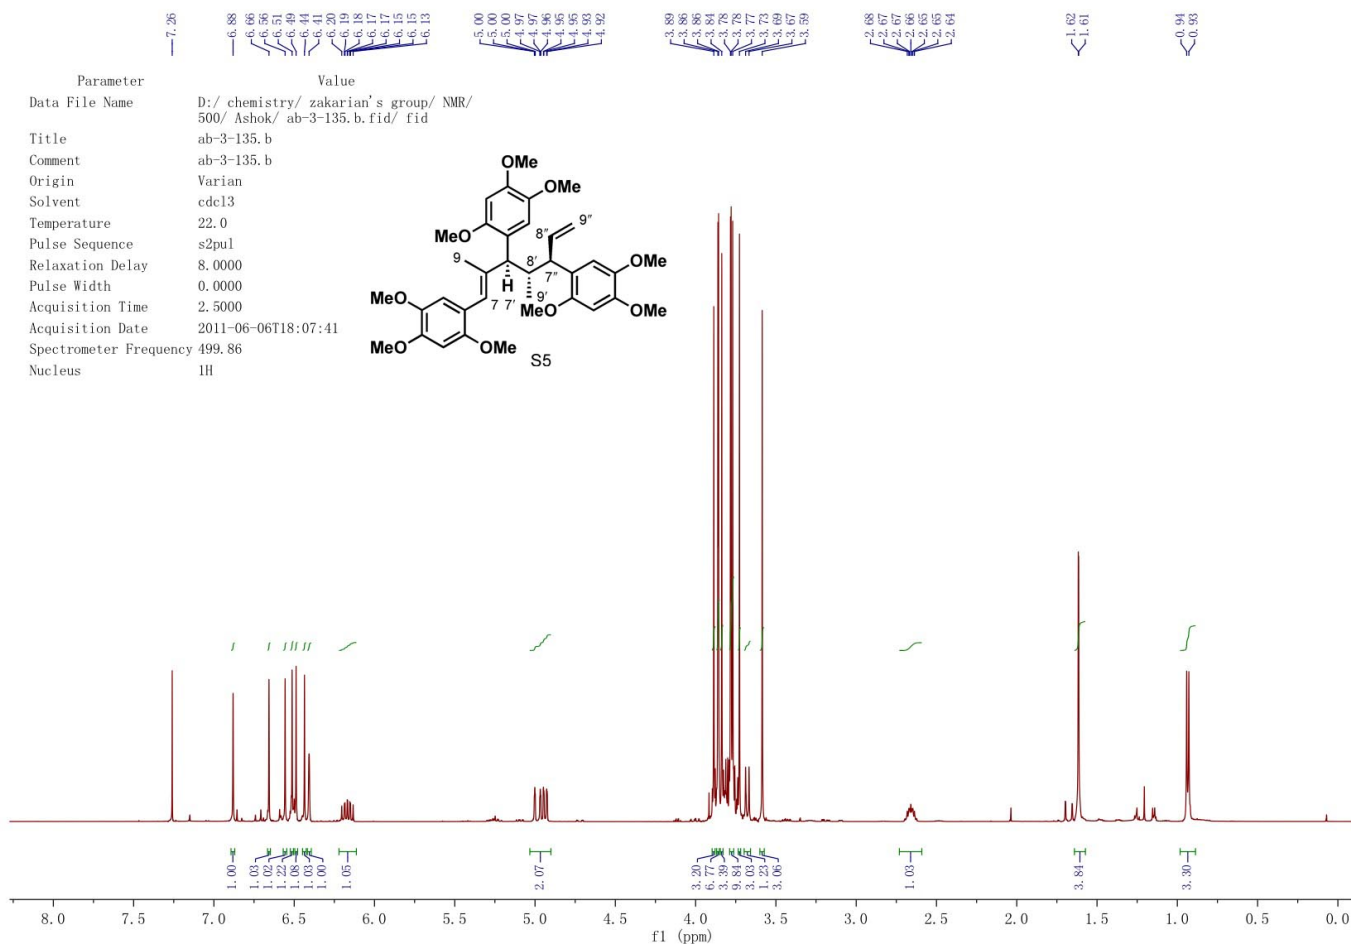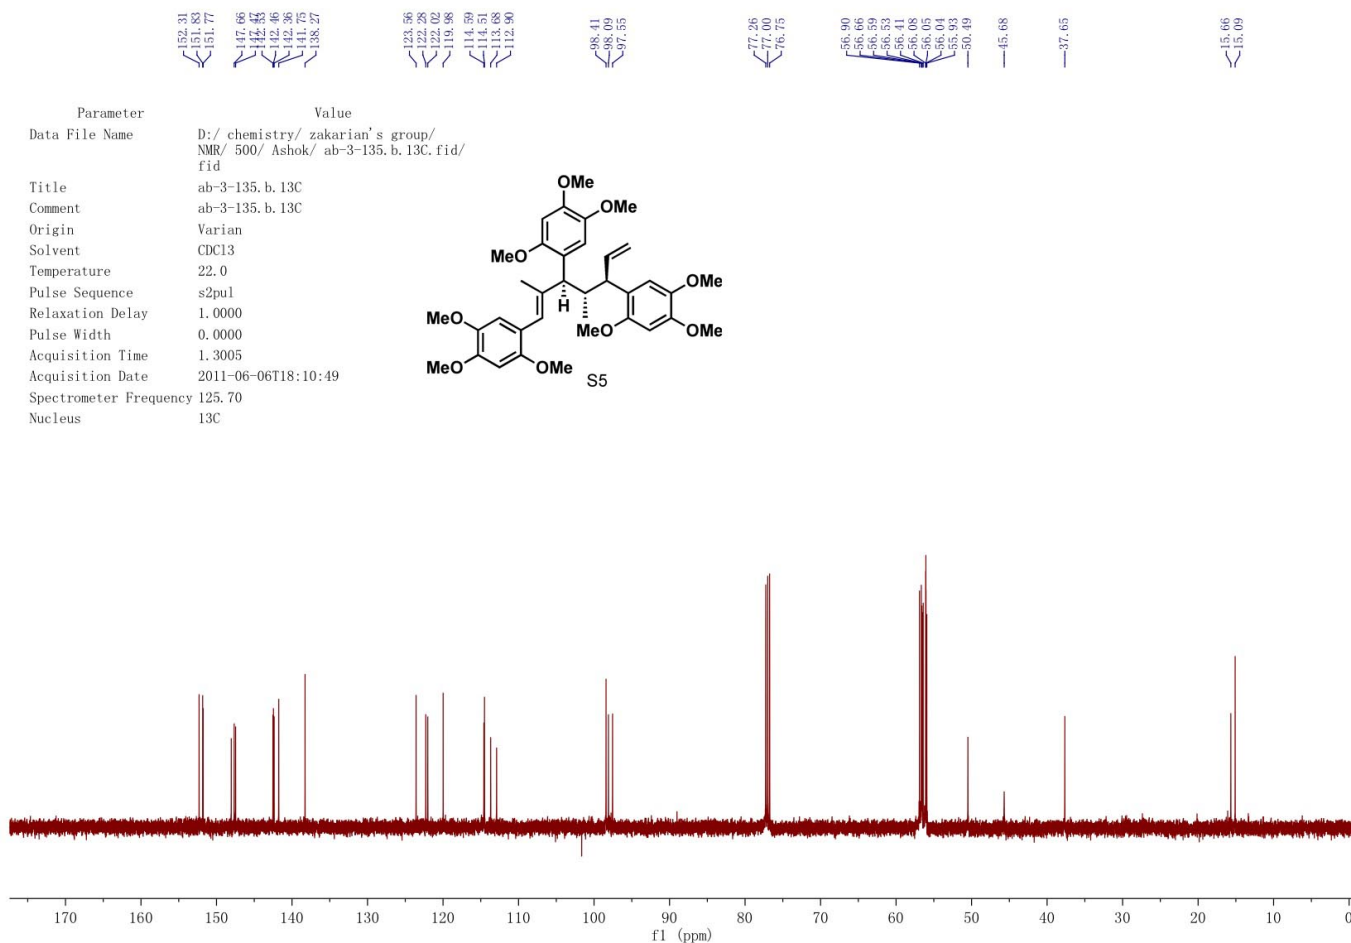

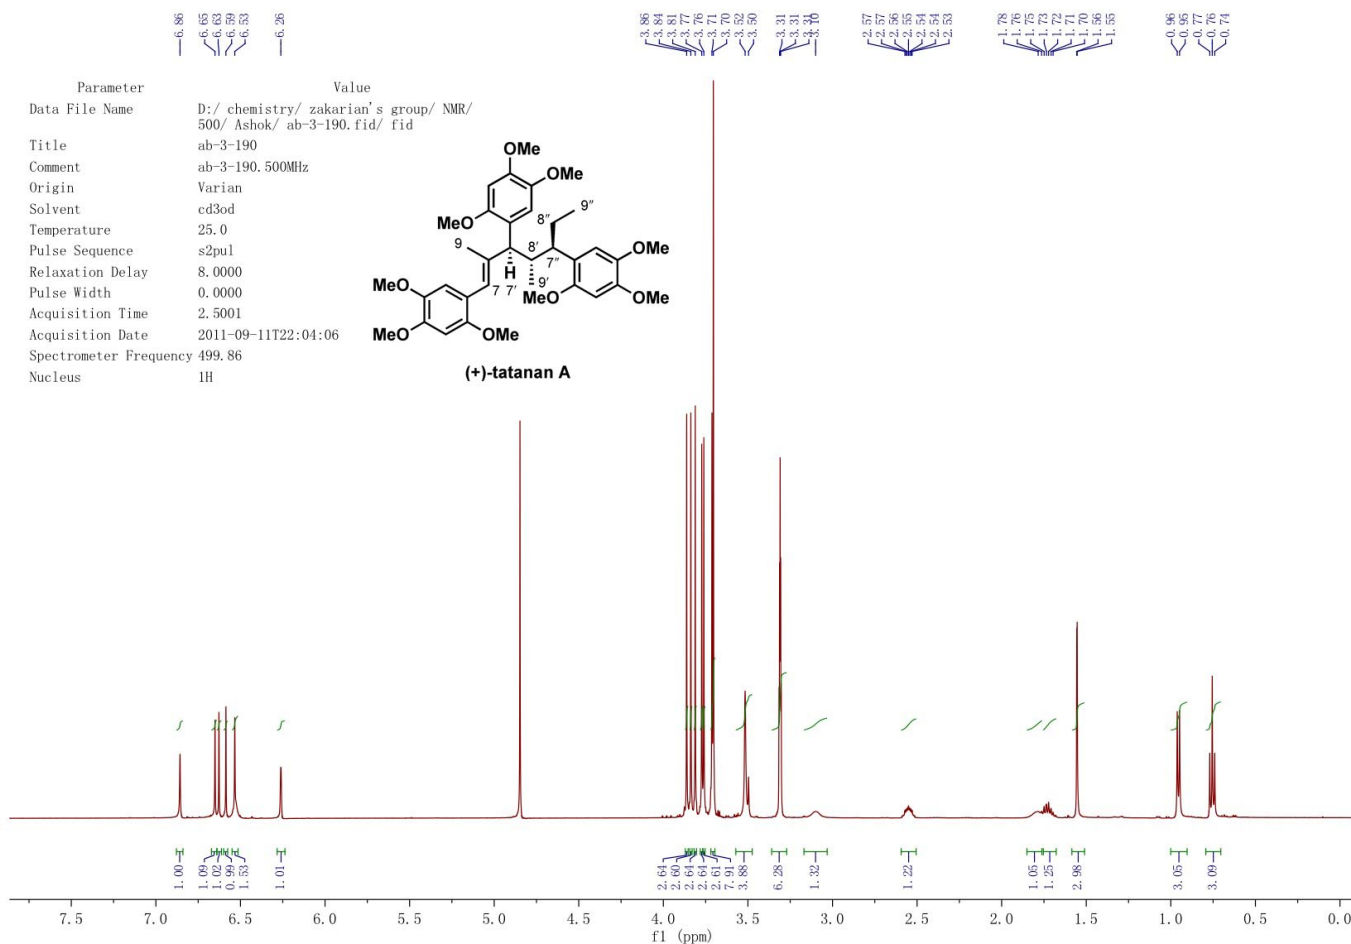



| Parameter              | Value                                                       |
|------------------------|-------------------------------------------------------------|
| Data File Name         | D:/ chemistry/ zakarian's group/ NMR/ 500/ xq-2-18.fid/ fid |
| Title                  | xq-2-18                                                     |
| Comment                | xq-2-18                                                     |
| Origin                 | Varian                                                      |
| Solvent                | CDCl3                                                       |
| Temperature            | 25.0                                                        |
| Pulse Sequence         | s2pul                                                       |
| Relaxation Delay       | 4.8000                                                      |
| Pulse Width            | 0.0000                                                      |
| Acquisition Time       | 2.5001                                                      |
| Acquisition Date       | 2012-04-28T10:45:39                                         |
| Spectrometer Frequency | 499.86                                                      |
| Nucleus                | 1H                                                          |

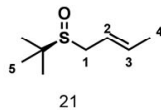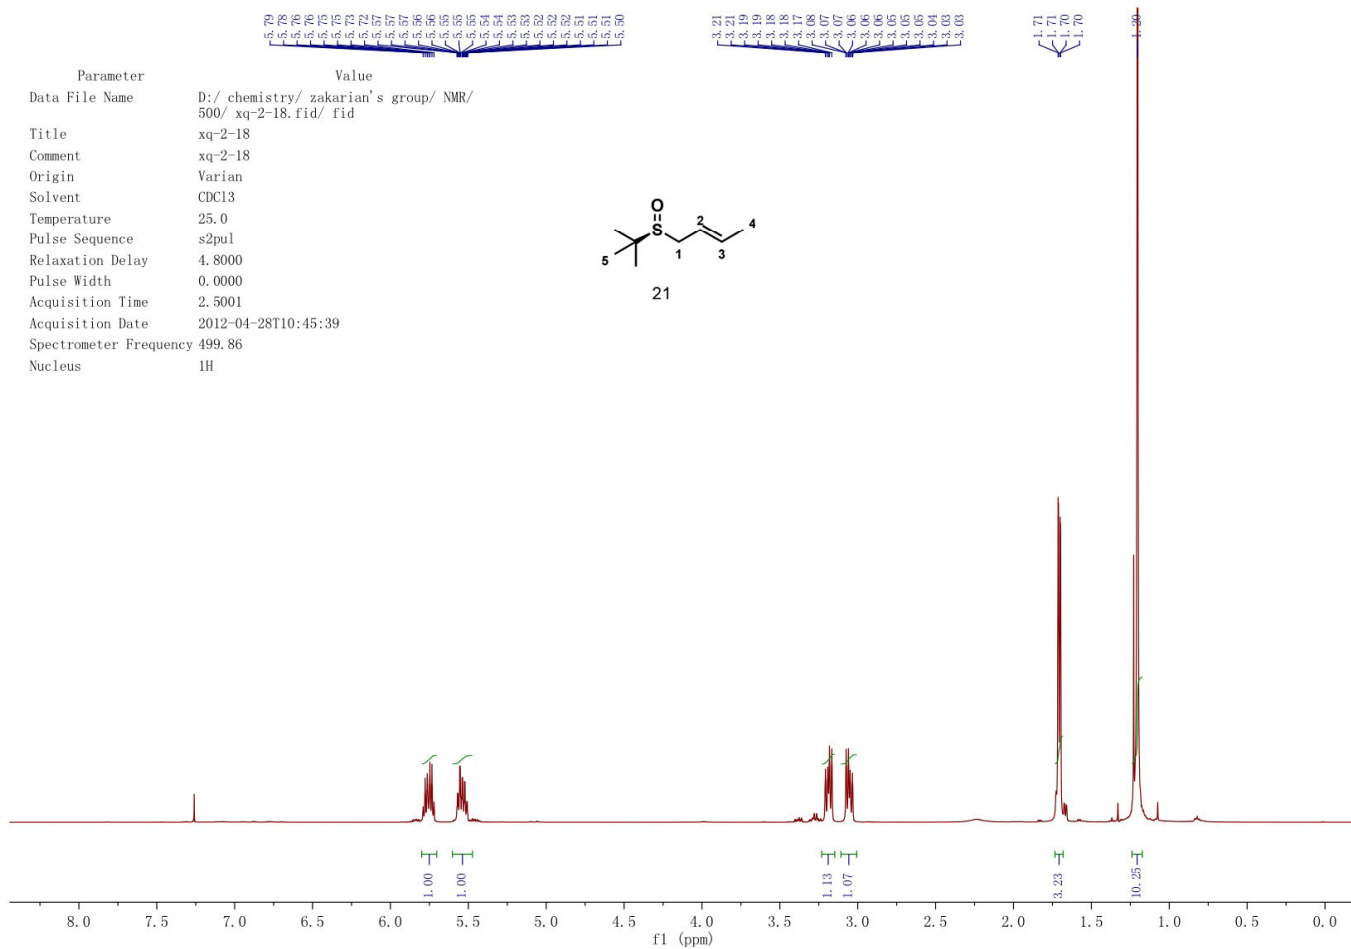

| Parameter              | Value                                                           |
|------------------------|-----------------------------------------------------------------|
| Data File Name         | D:/ chemistry/ zakarian's group/ NMR/ 500/ xq-2-18-C13.fid/ fid |
| Title                  | xq-2-18-C13                                                     |
| Comment                | xq-2-18-C13                                                     |
| Origin                 | Varian                                                          |
| Solvent                | CDCl3                                                           |
| Temperature            | 25.0                                                            |
| Pulse Sequence         | s2pul                                                           |
| Relaxation Delay       | 1.0000                                                          |
| Pulse Width            | 0.0000                                                          |
| Acquisition Time       | 1.3026                                                          |
| Acquisition Date       | 2012-04-28T10:46:51                                             |
| Spectrometer Frequency | 125.70                                                          |
| Nucleus                | 13C                                                             |

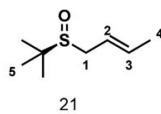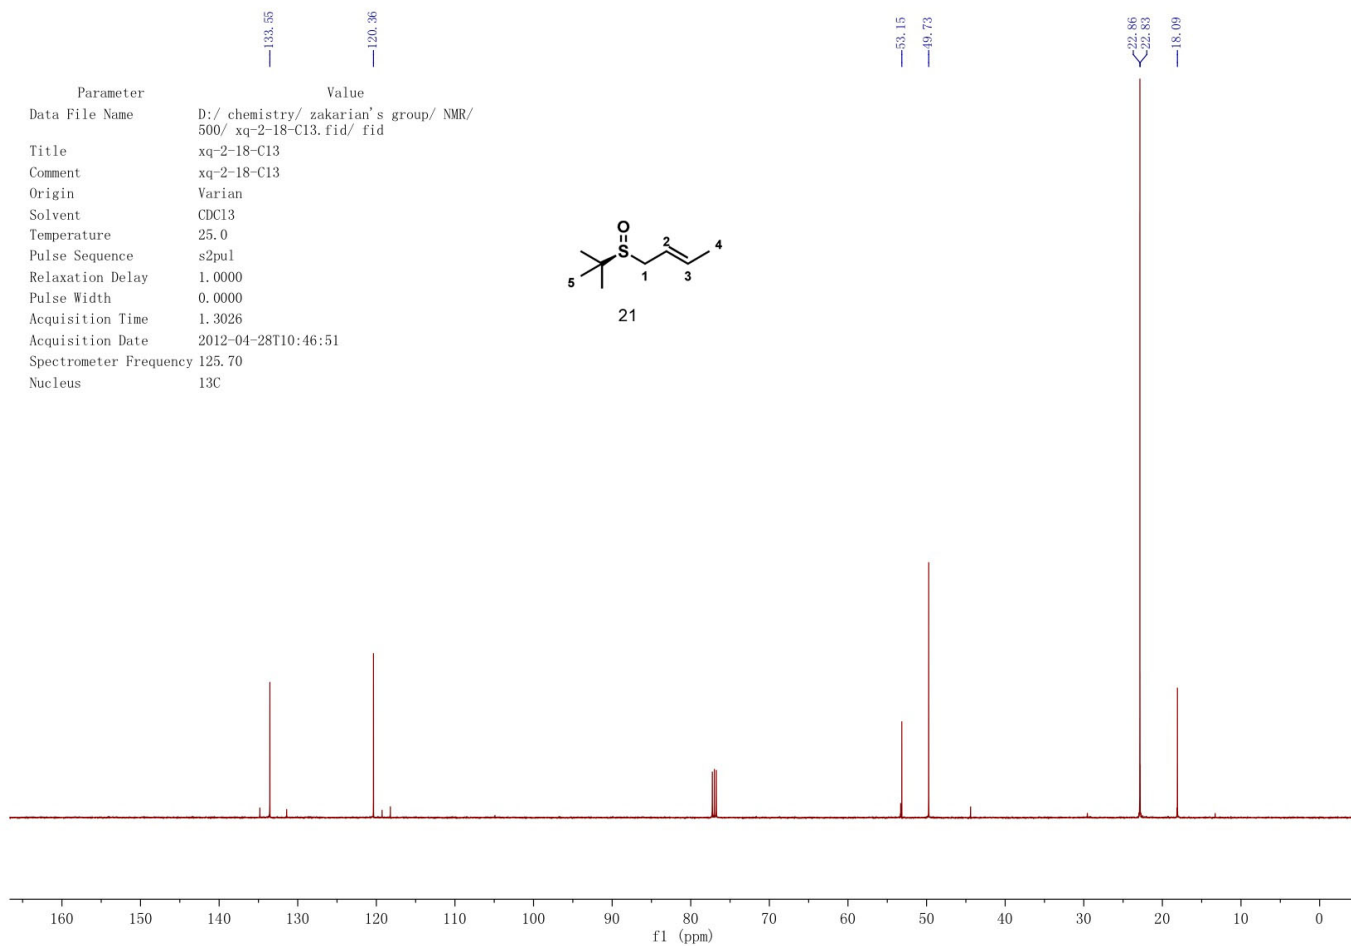

### ==== Shimadzu LCsolution Analysis Report ====

C:\LabSolutions\Data\Project1\xq-sulfoxide-rac-01.lcd

Acquired by : Admin  
 Sample Name : xq-sulfoxide-rac  
 Sample ID : xq-sulfoxide-rac  
 Vial # :  
 Injection Volume : 25 uL  
 Data File Name : xq-sulfoxide-rac-01.lcd  
 Method File Name : JB-test-1.lcm  
 Batch File Name :  
 Report File Name : Default.lcr  
 Data Acquired : 5/4/2012 8:40:22 PM  
 Data Processed : 7/26/2012 4:33:16 PM 2% iPrOH-hexane  
 1 ml/min  
 1 mg/ml concentration  
 30 uL injection  
 200 nm  
 chiral-AD-H  
 Chromatogram

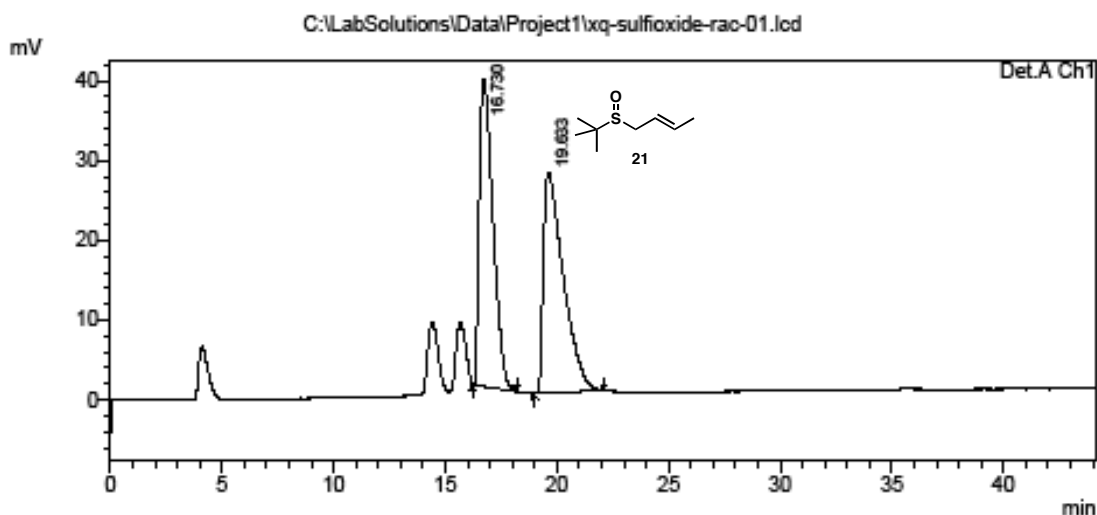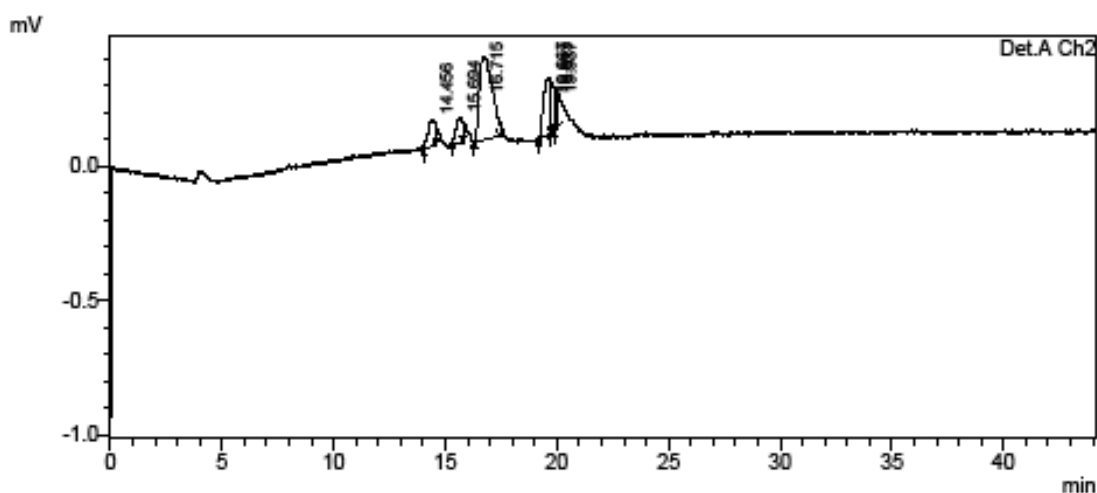

1 Det.A Ch1/200nm  
 2 Det.A Ch2/254nm

PeakTable

### ==== Shimadzu LCsolution Analysis Report ====

C:\LabSolutions\Data\Project1\xq-sulfoxide-2-43.lcd

2% iPrOH in Hex  
 1ml/min AD-H  
 1 mg/ml  
 20 uL Acquired by : Admin  
 Sample Name : xq-sulfoxide-2-43.lcd  
 Sample ID : xq-sulfoxide-2-43  
 Vial # :  
 Injection Volume : 20 uL  
 Data File Name : xq-sulfoxide-2-43.lcd  
 Method File Name : hk-standard.lcm  
 Batch File Name :  
 Report File Name : Default.lcr  
 Data Acquired : 5/21/2012 12:07:47 PM  
 Data Processed : 5/21/2012 8:08:47 PM

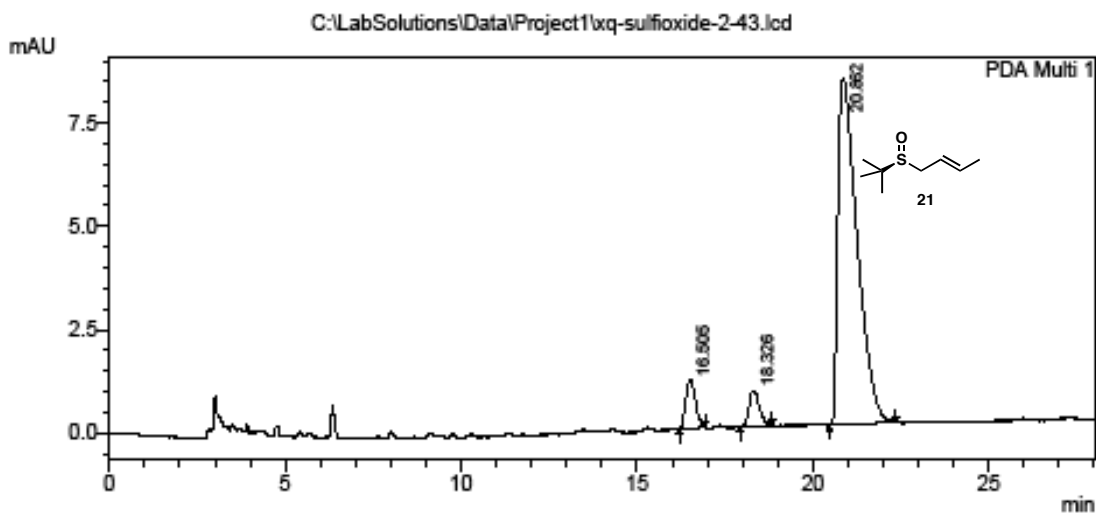

1 PDA Multi 1/254nm 4nm

PeakTable

PDA Ch1 254nm 4nm

| Peak# | Ret. Time | Area   | Height | Area %  | Height % |
|-------|-----------|--------|--------|---------|----------|
| 1     | 16.505    | 22128  | 1161   | 6.110   | 11.158   |
| 2     | 18.326    | 18122  | 859    | 5.004   | 8.258    |
| 3     | 20.862    | 321895 | 8382   | 88.886  | 80.584   |
| Total |           | 362145 | 10401  | 100.000 | 100.000  |

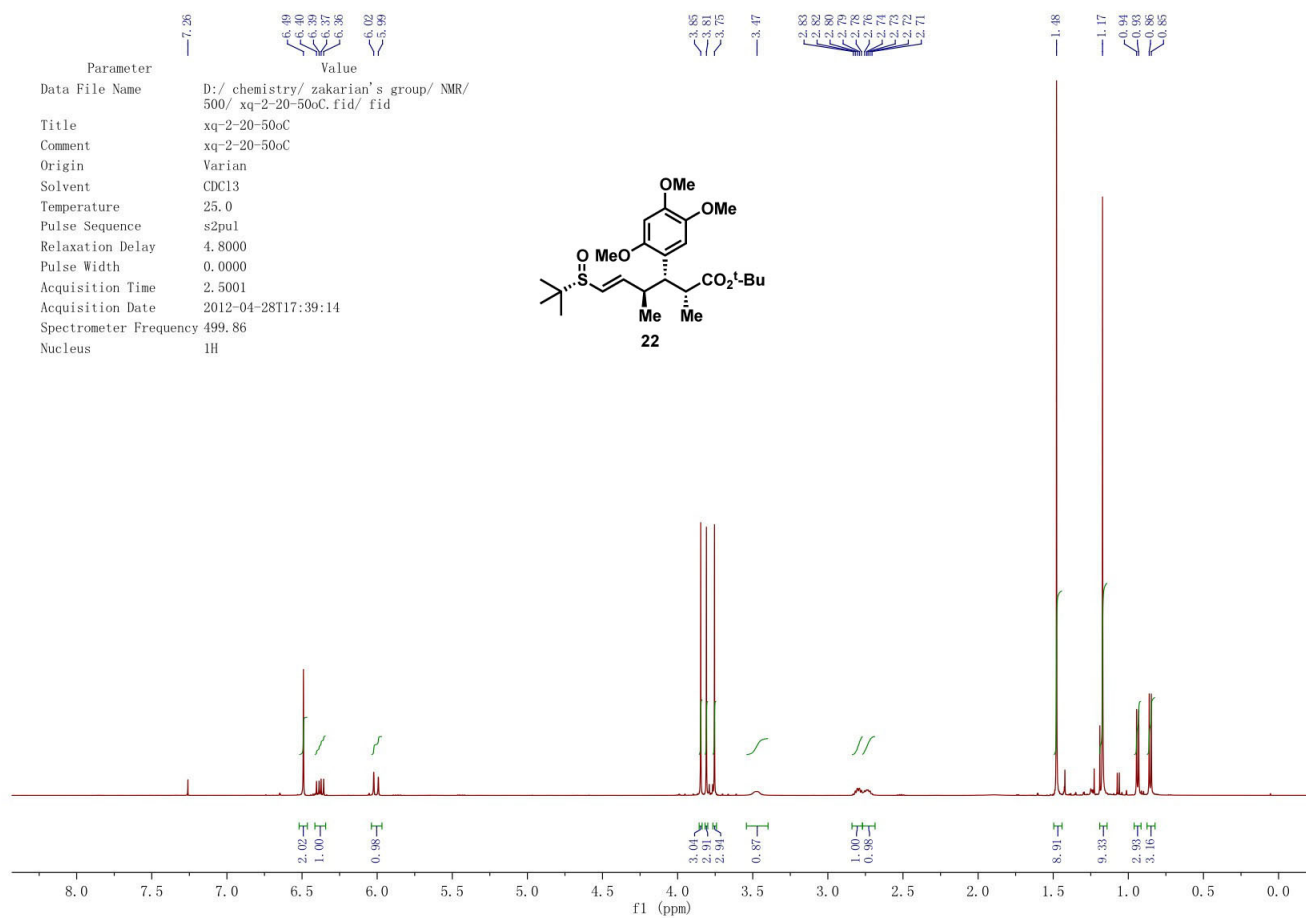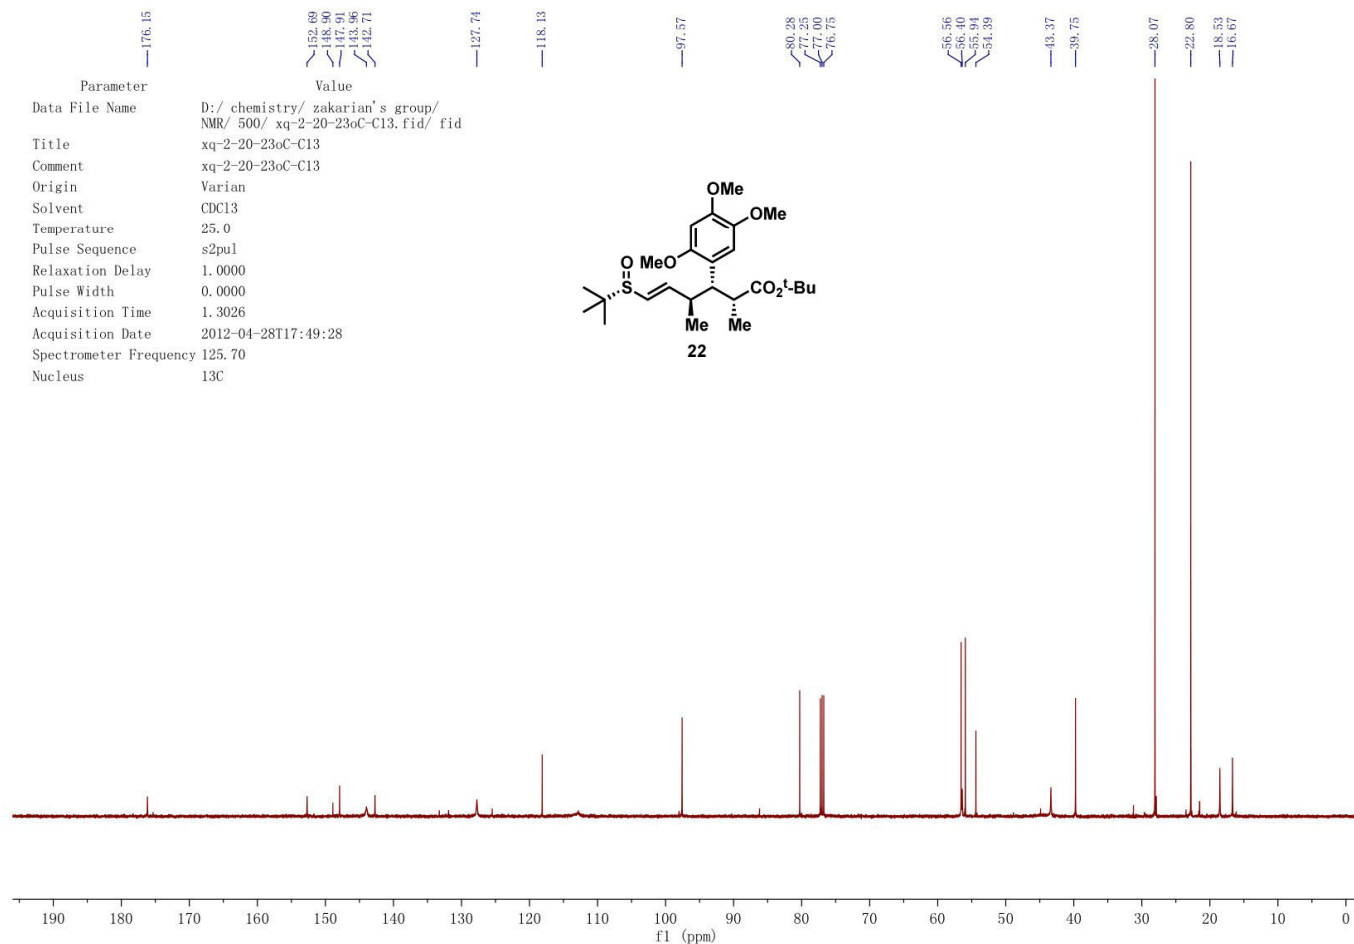

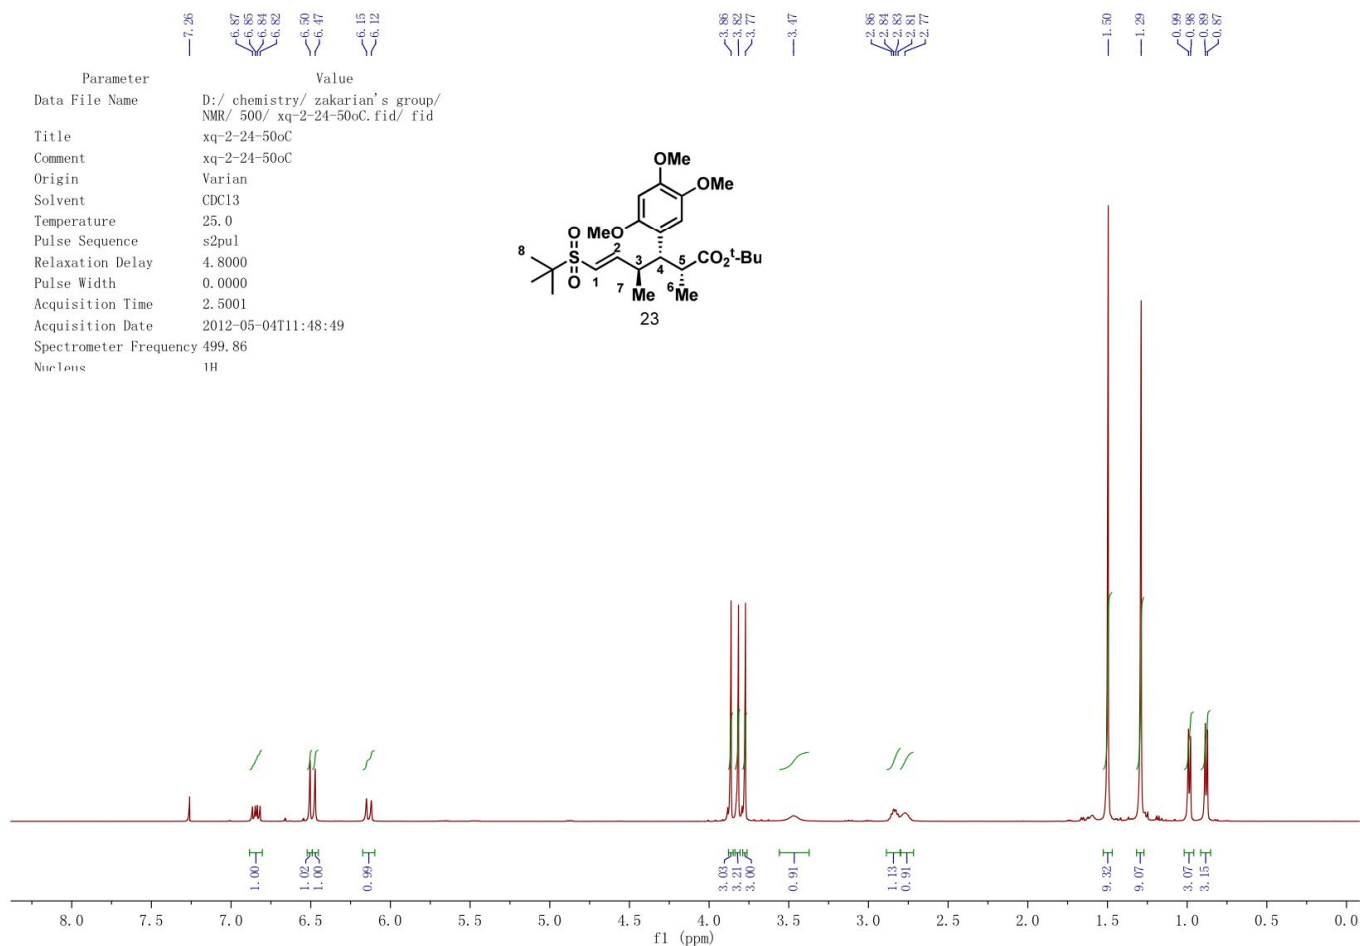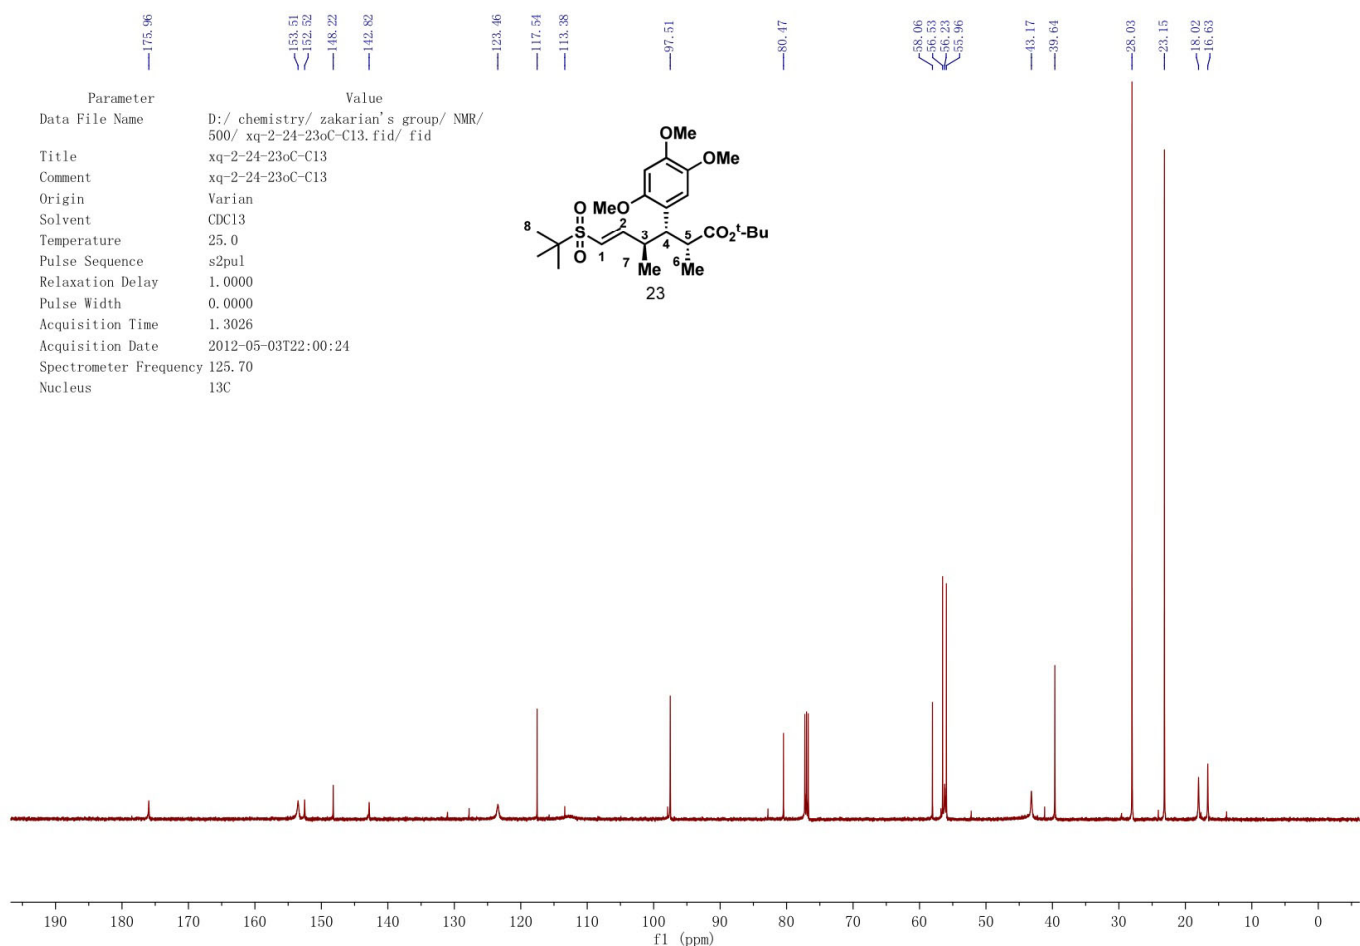

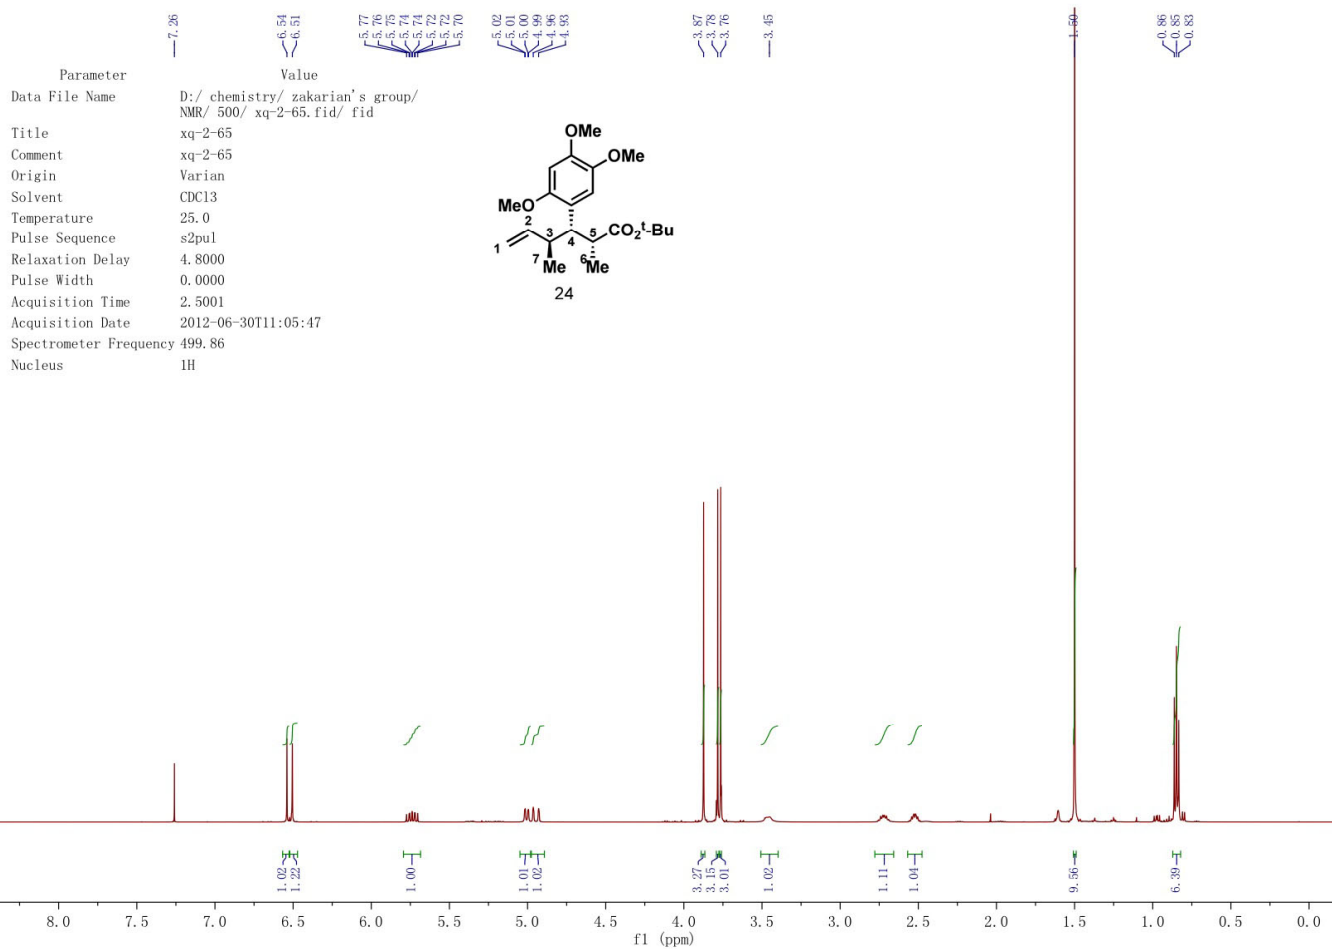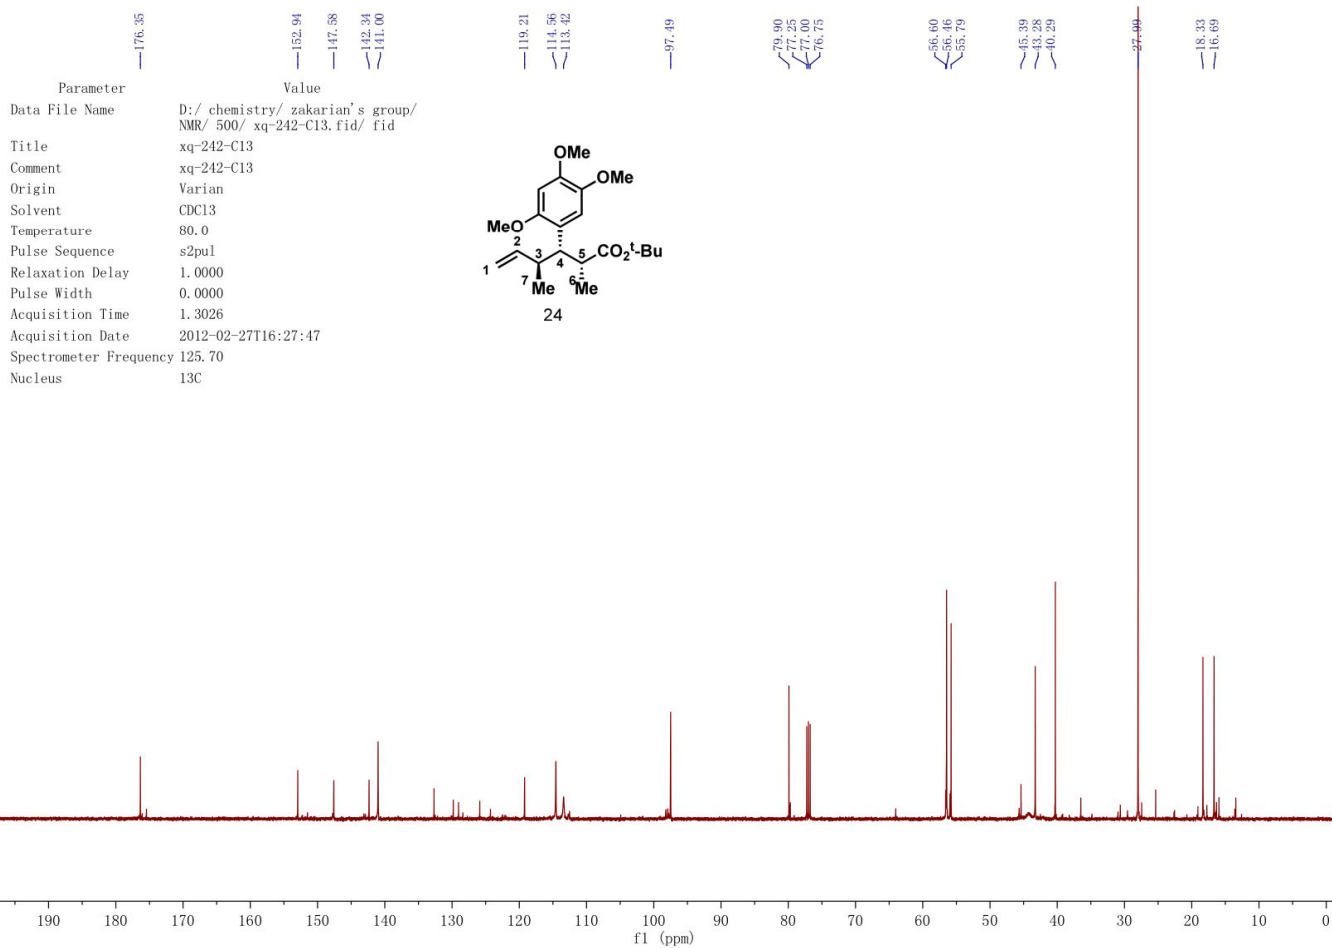

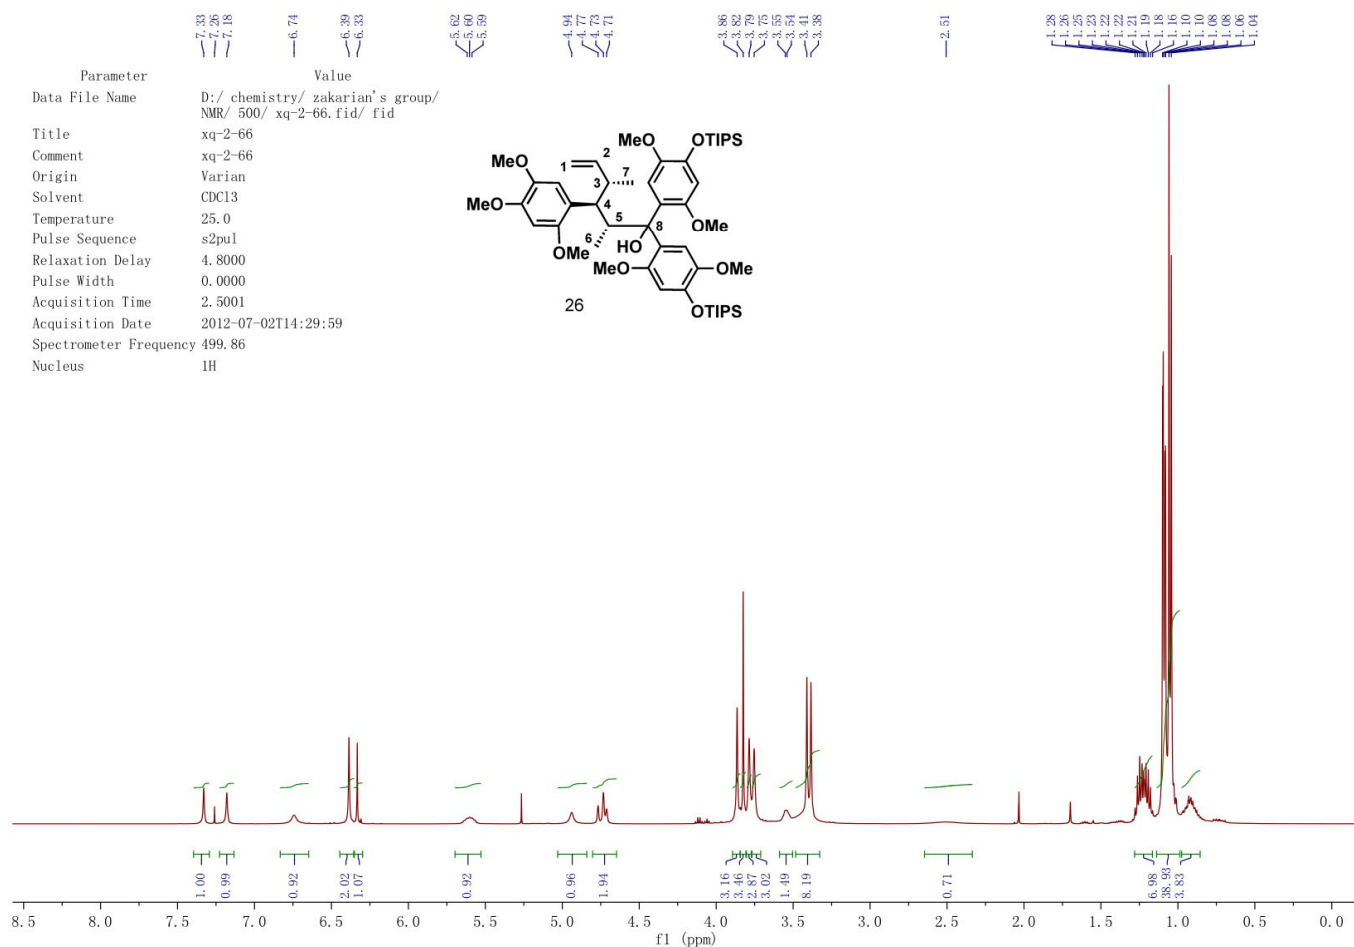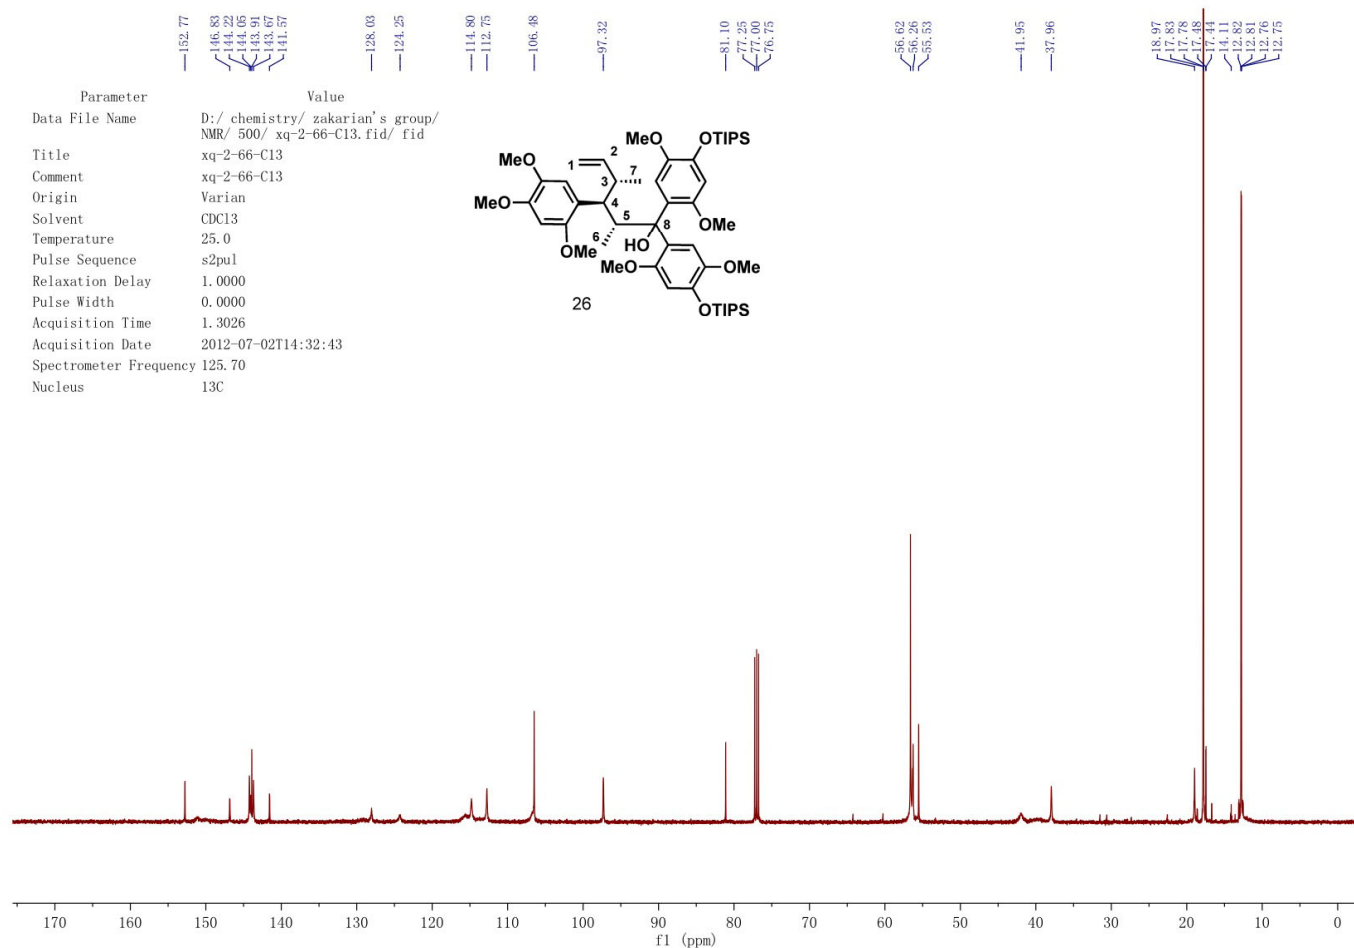

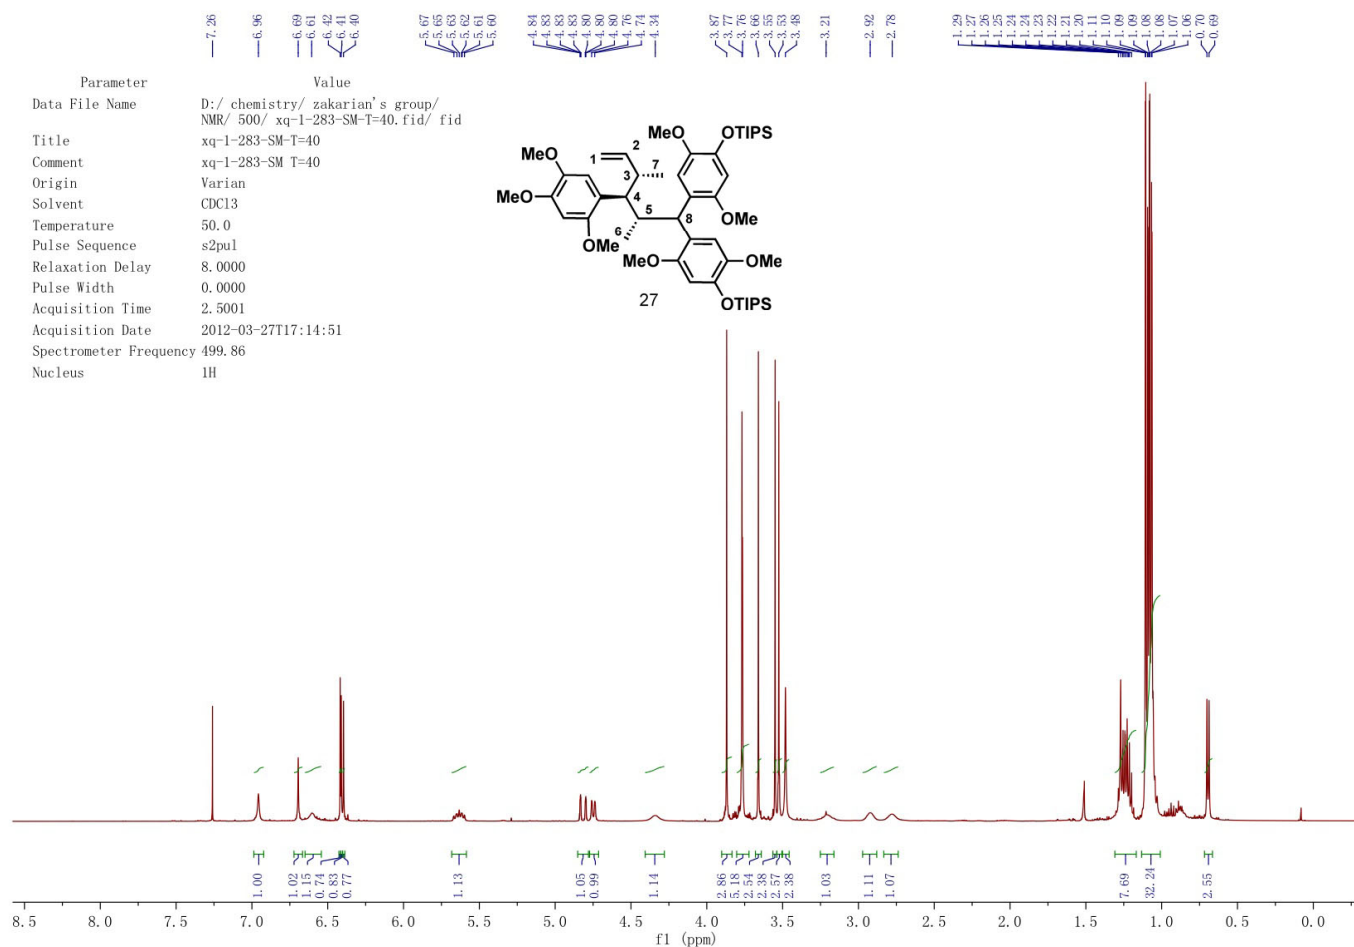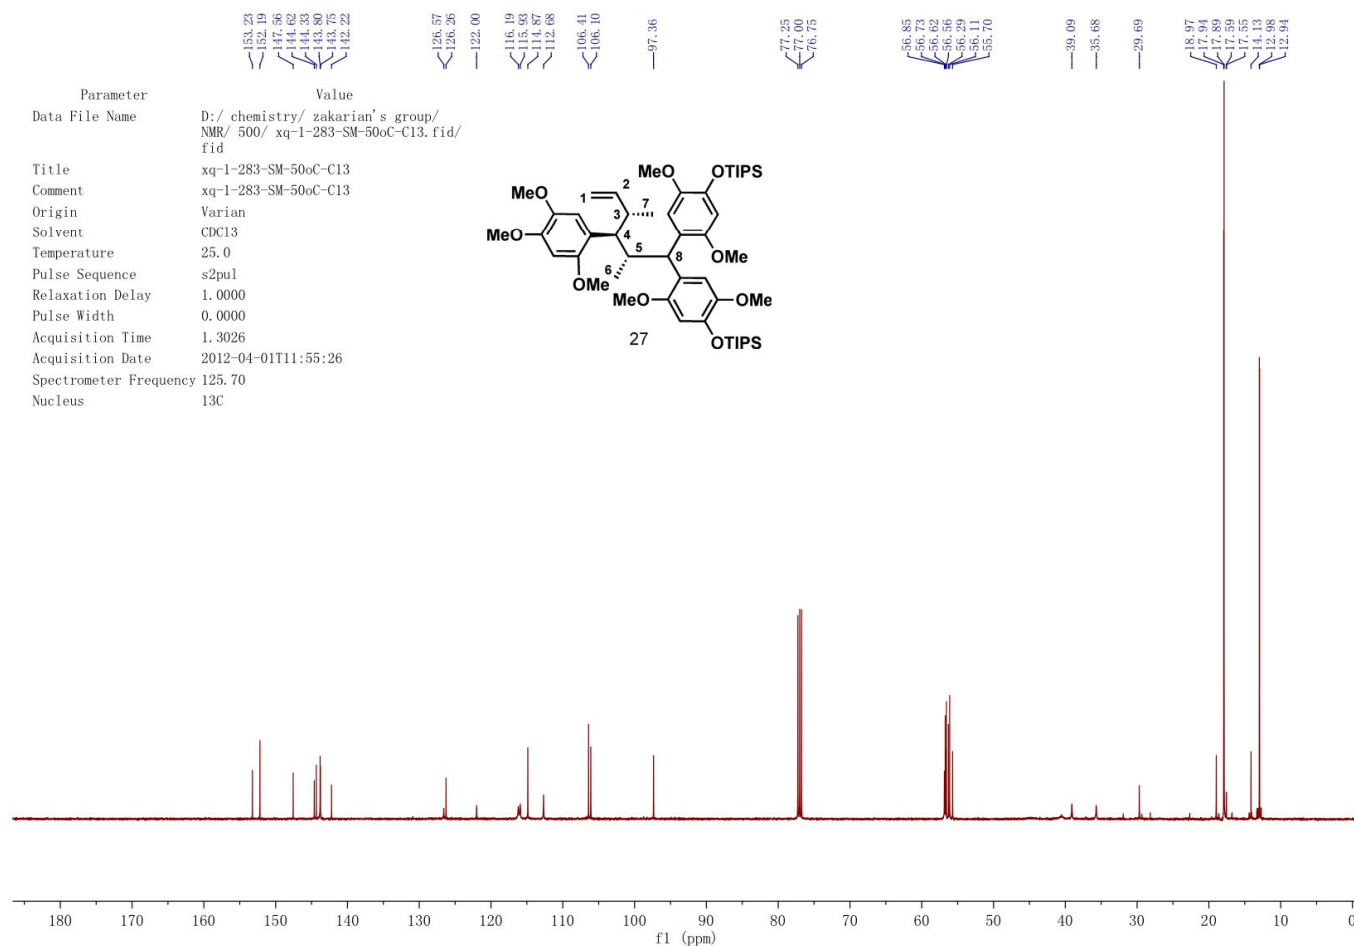



Parameter Value  
 Data File Name D:/chemistry/zakarian's group/  
 NMR/ 500/ xq-1-292-HPLC-2-50oC.fid/  
 fid  
 Title xq-1-292-HPLC-2-50oC  
 Comment xq-1-292-HPLC-2-50oC  
 Origin Varian  
 Solvent CDCl3  
 Temperature 25.0  
 Pulse Sequence s2pul  
 Relaxation Delay 4.8000  
 Pulse Width 0.0000  
 Acquisition Time 2.5001  
 Acquisition Date 2012-04-15T13:56:44  
 Spectrometer Frequency 499.86  
 Nucleus 1H

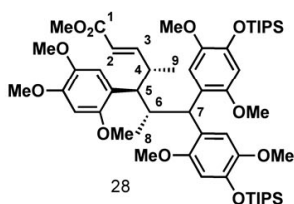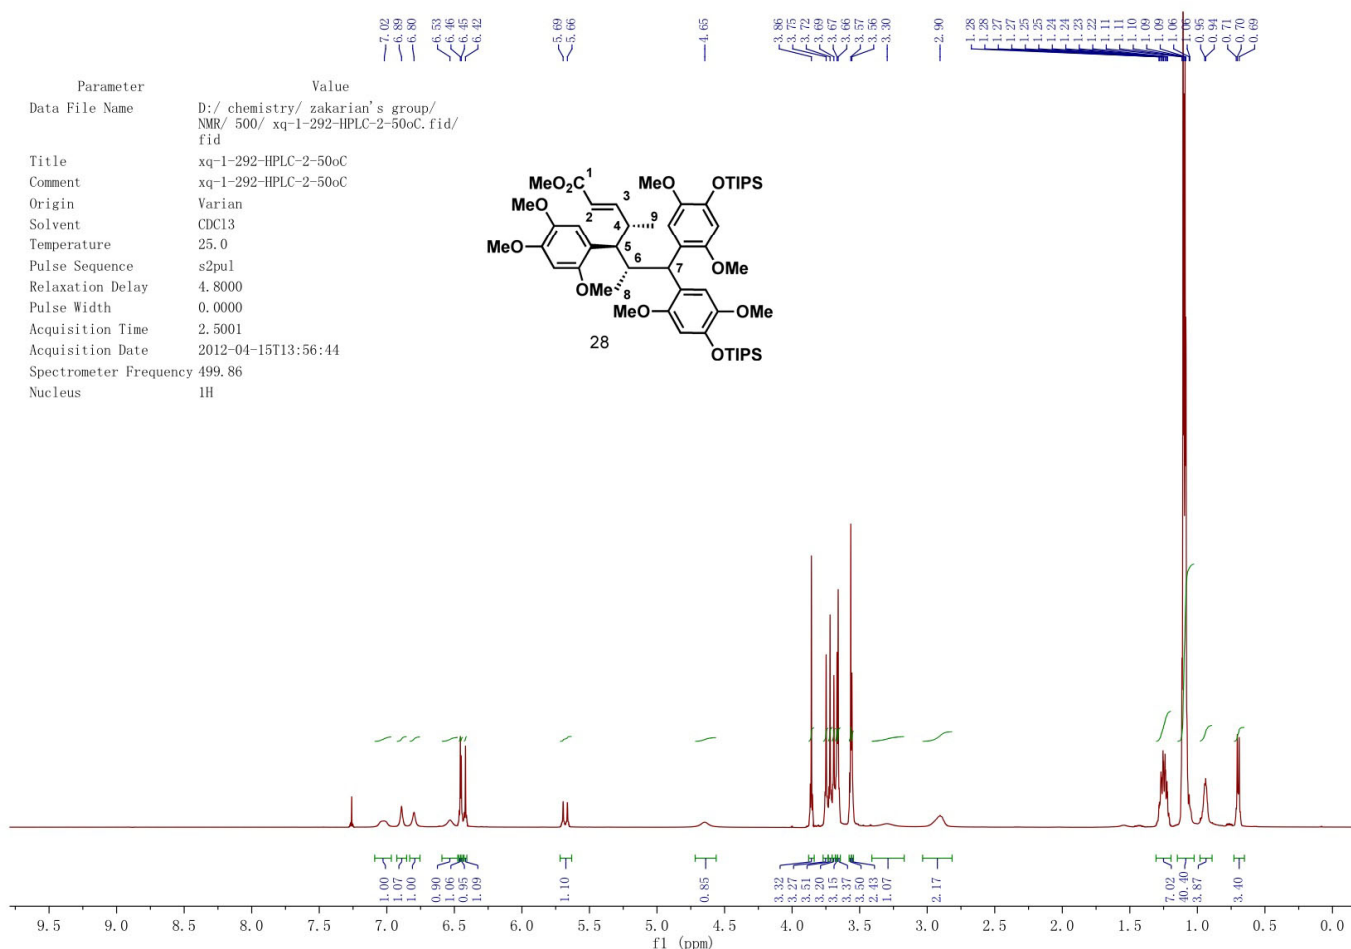

Parameter Value  
 Data File Name D:/chemistry/zakarian's group/ NMR/  
 500/ xq-1-292-HPLC-2-50oC-C13.fid/ fid  
 Title xq-1-292-HPLC-2-50oC-C13  
 Comment xq-1-292-HPLC-2-50oC-C13  
 Origin Varian  
 Solvent CDCl3  
 Temperature 25.0  
 Pulse Sequence s2pul  
 Relaxation Delay 1.0000  
 Pulse Width 0.0000  
 Acquisition Time 1.3026  
 Acquisition Date 2012-04-15T13:59:08  
 Spectrometer Frequency 125.70  
 Nucleus 13C

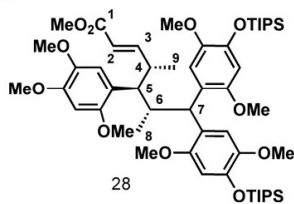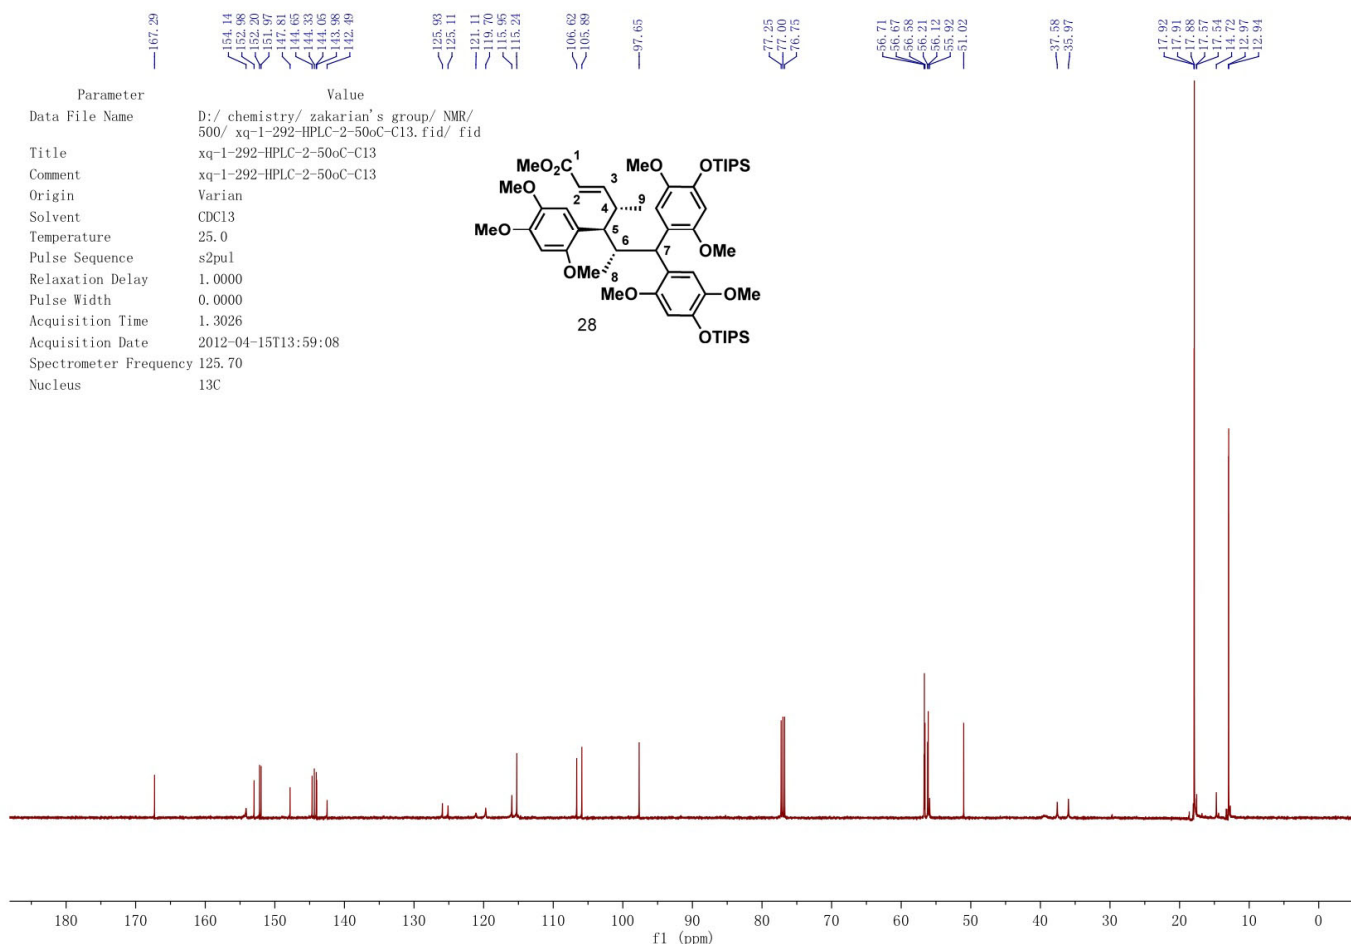

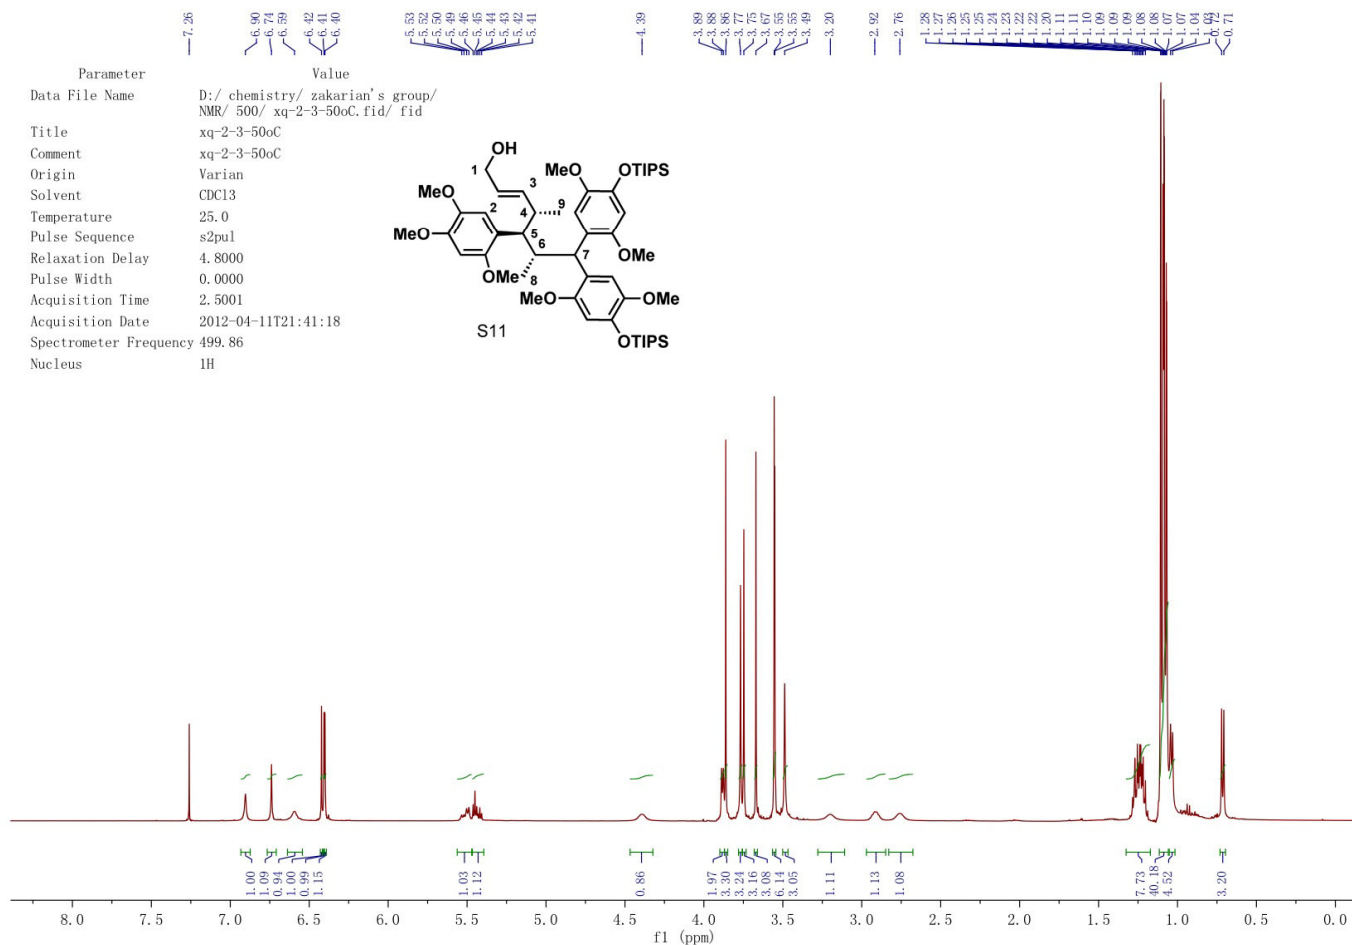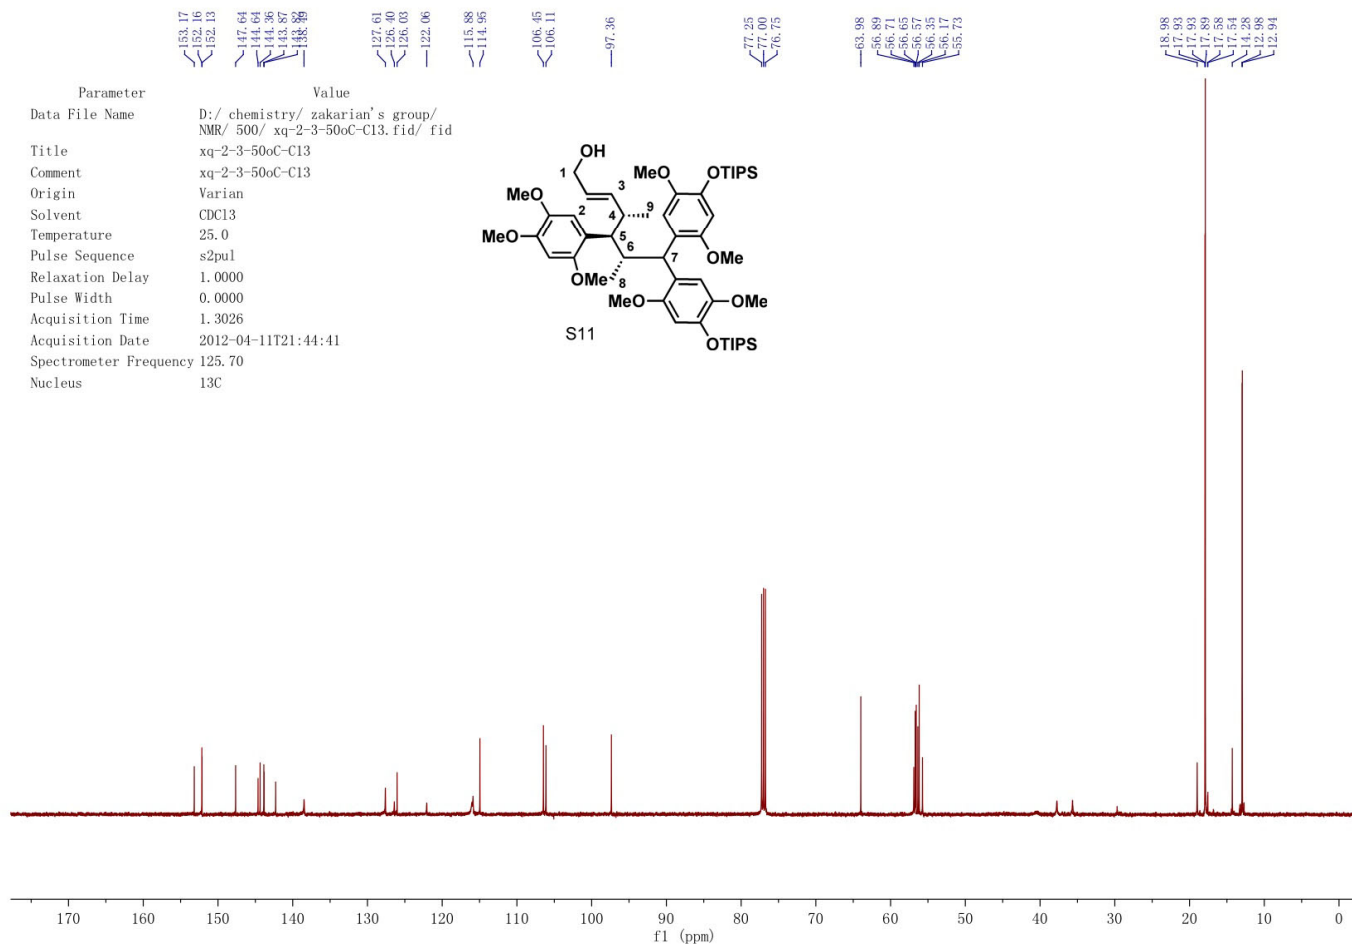

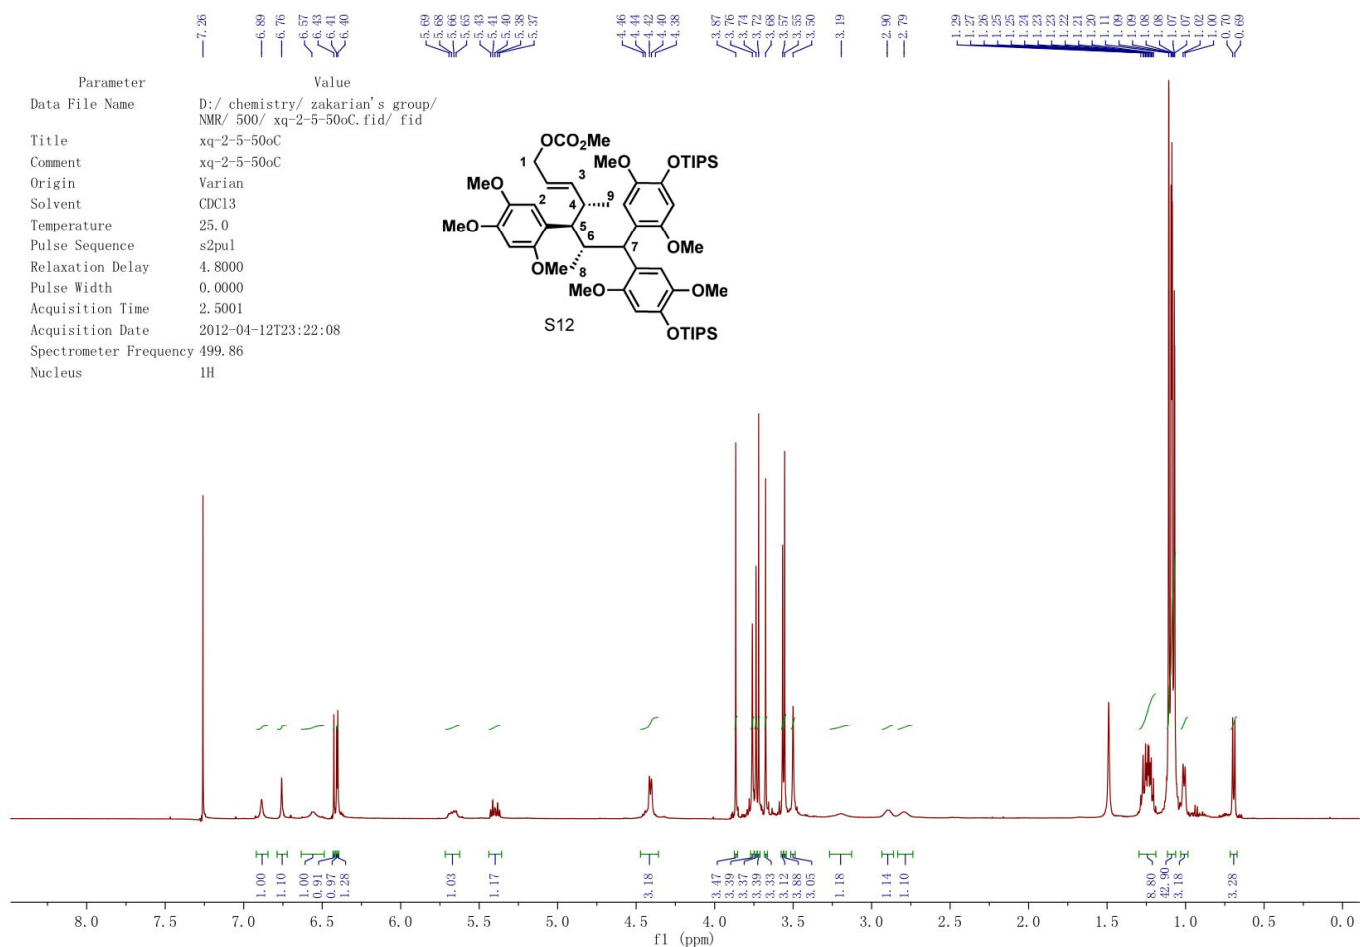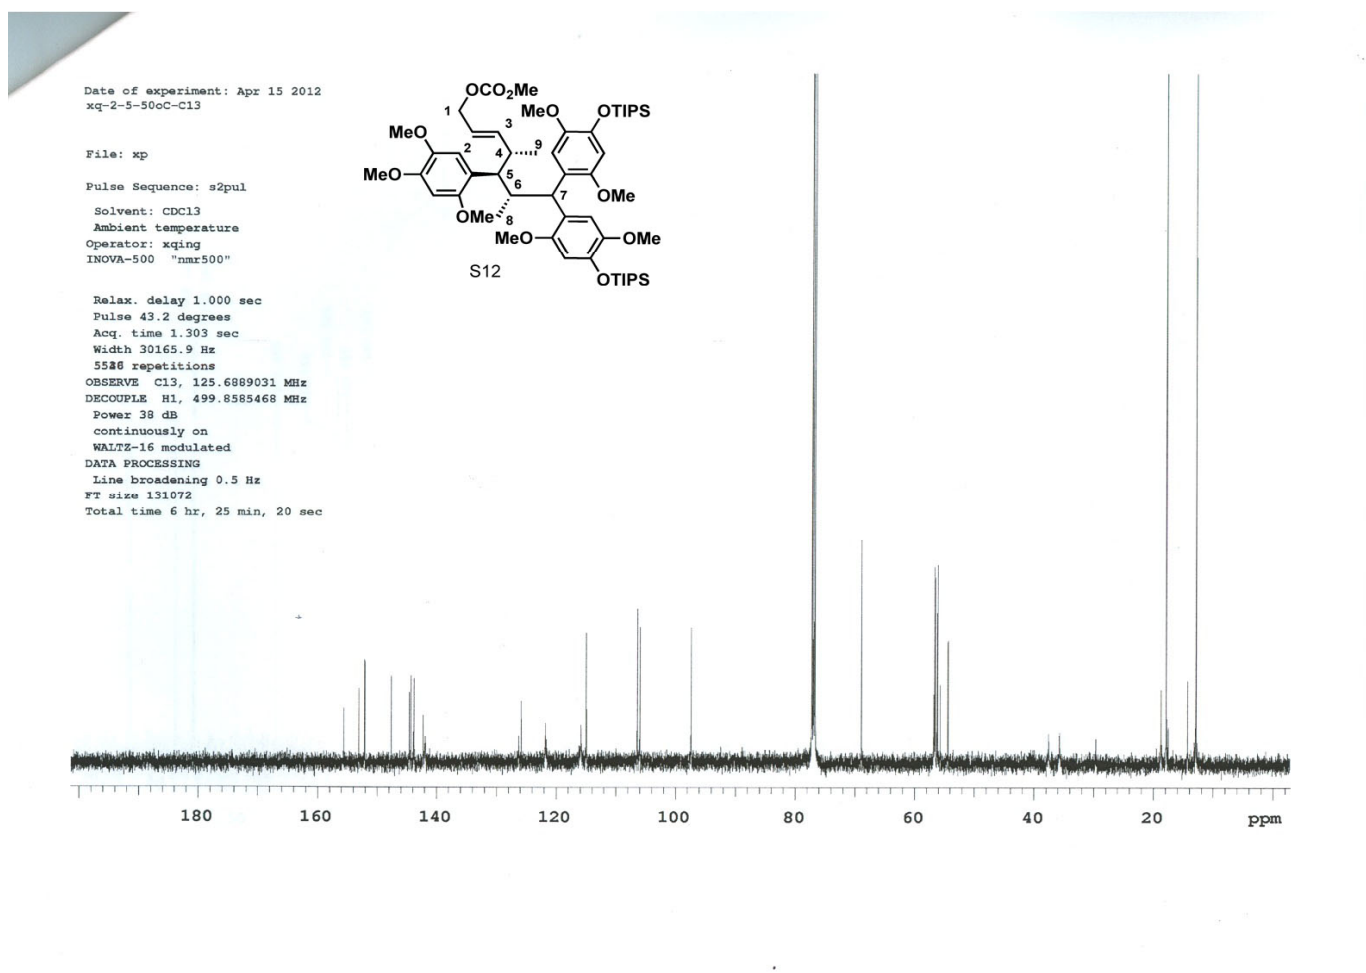

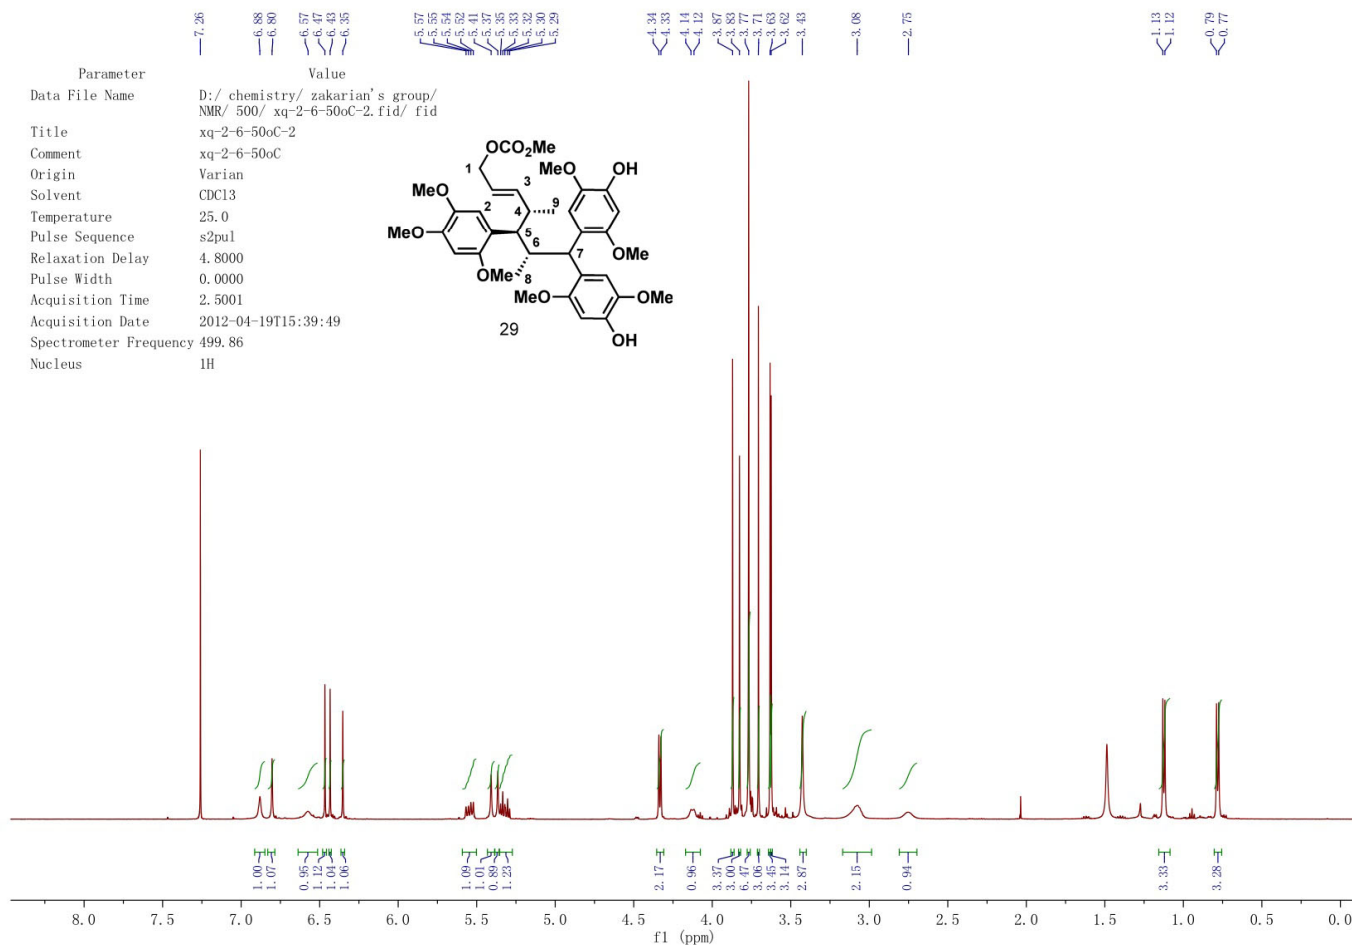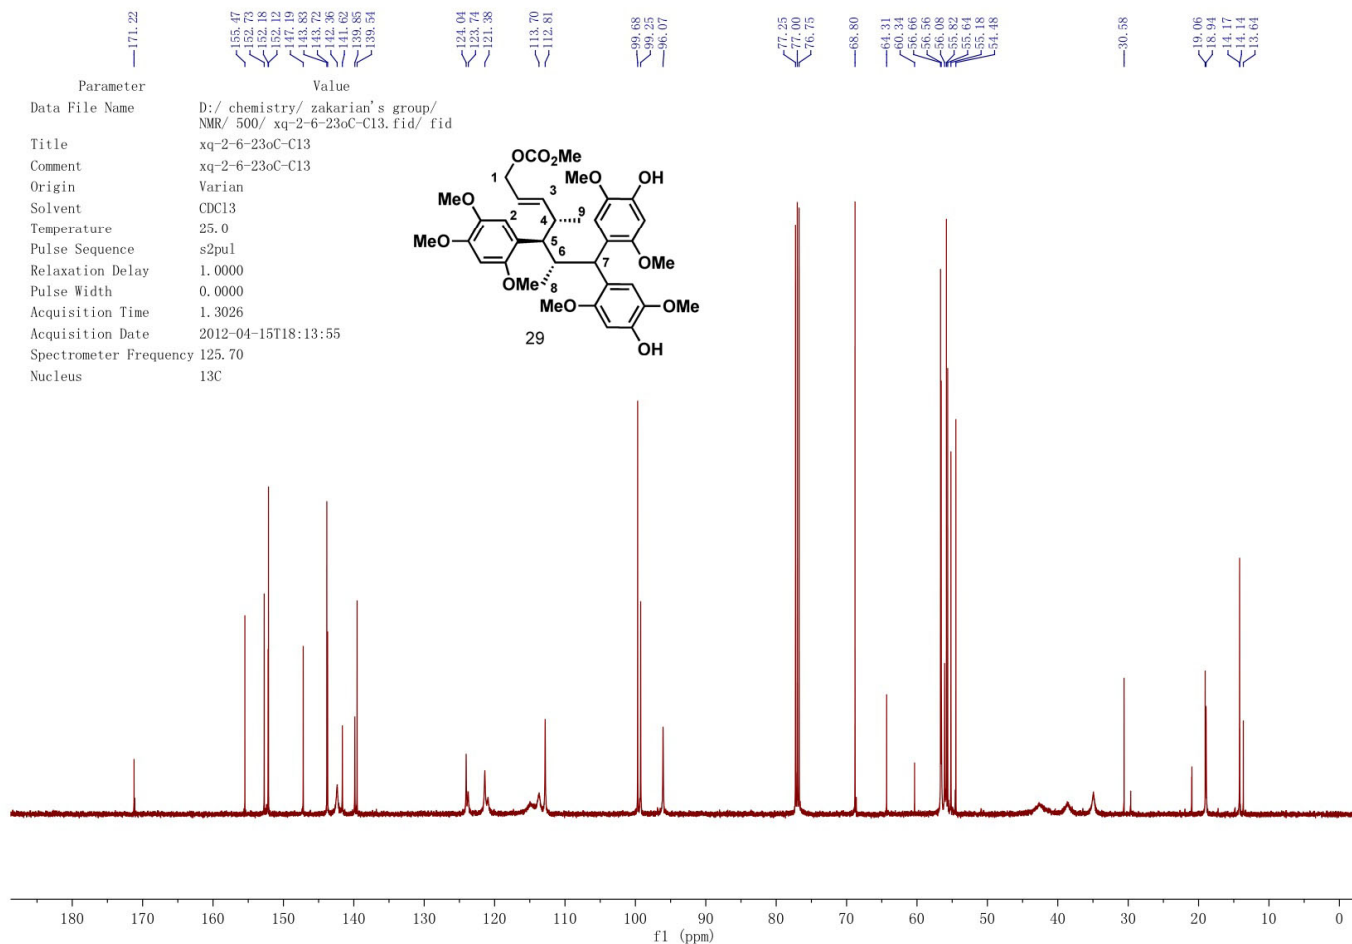

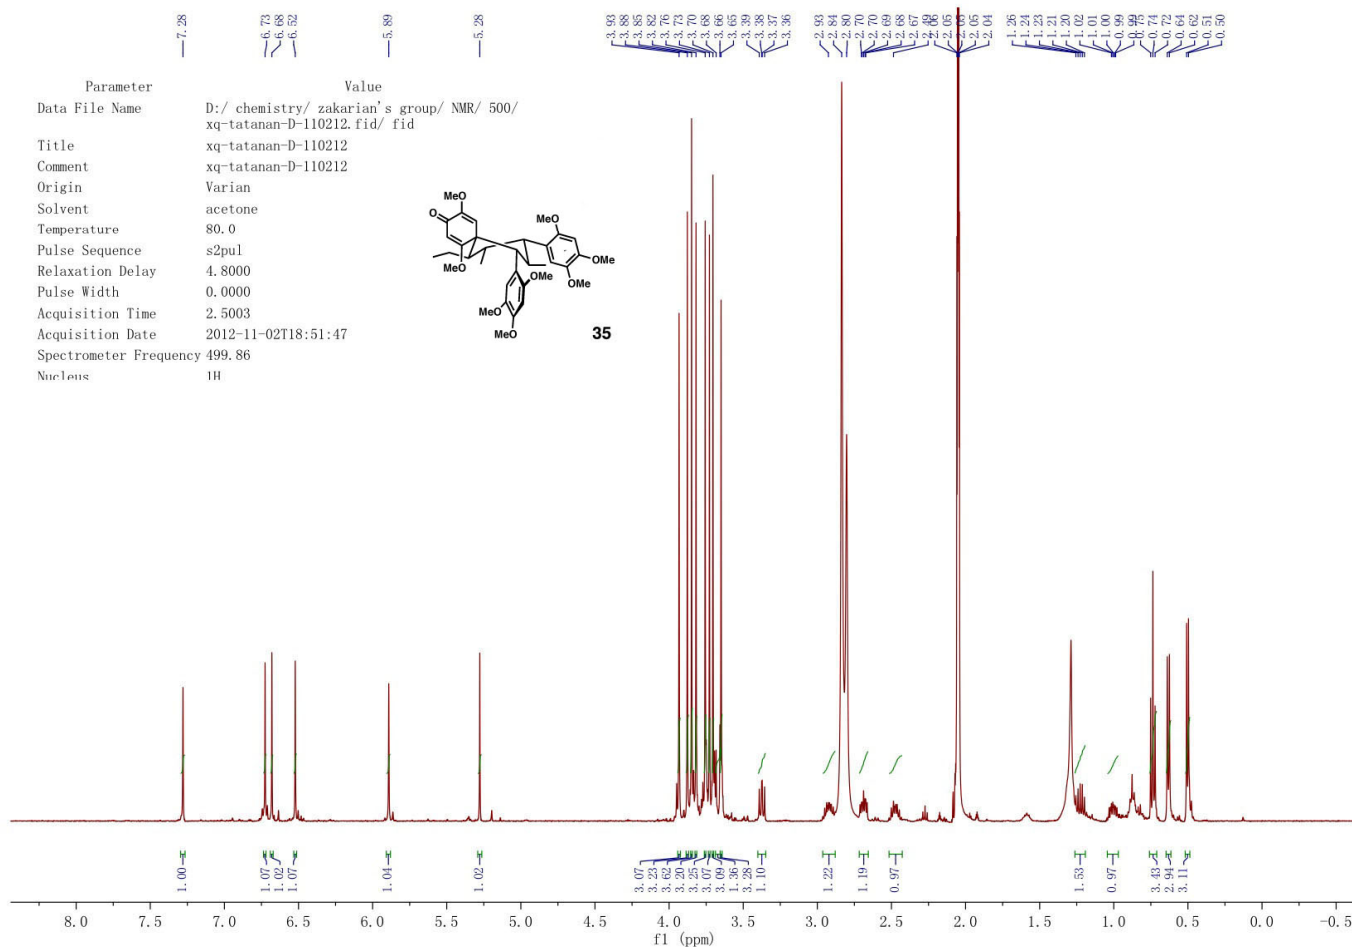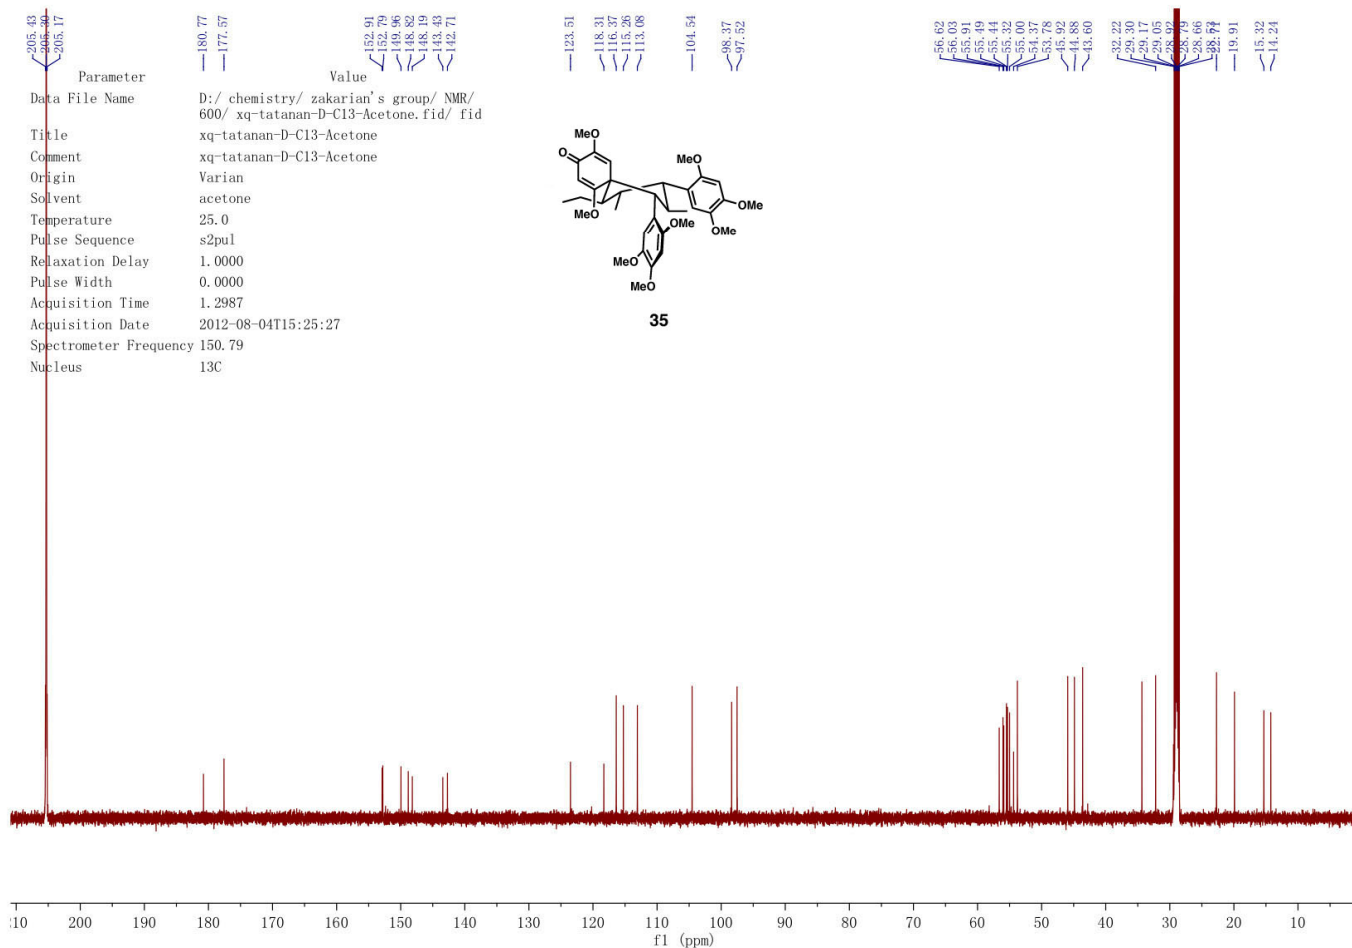

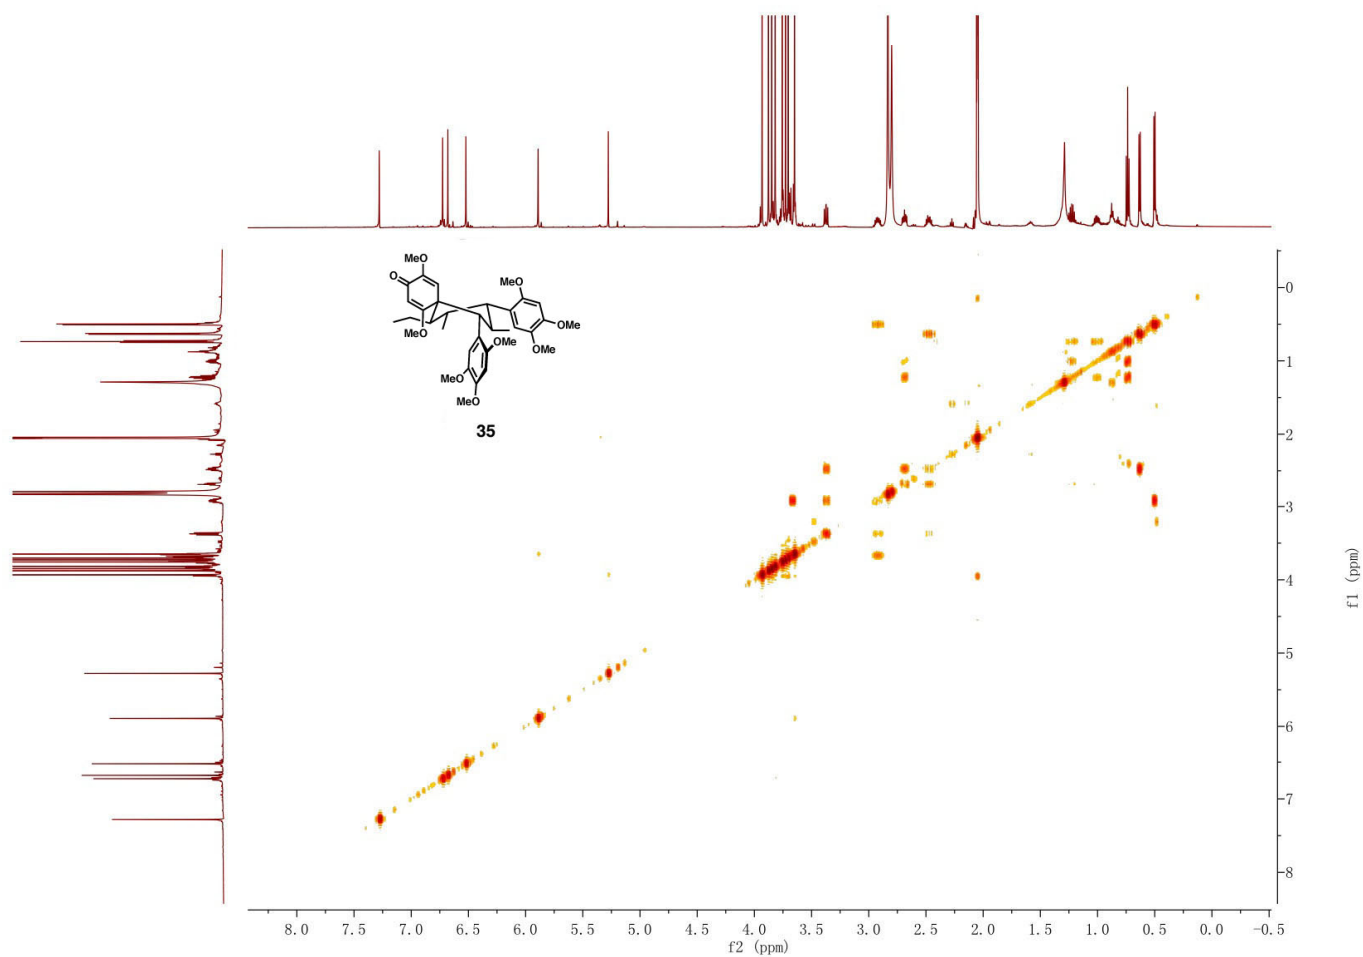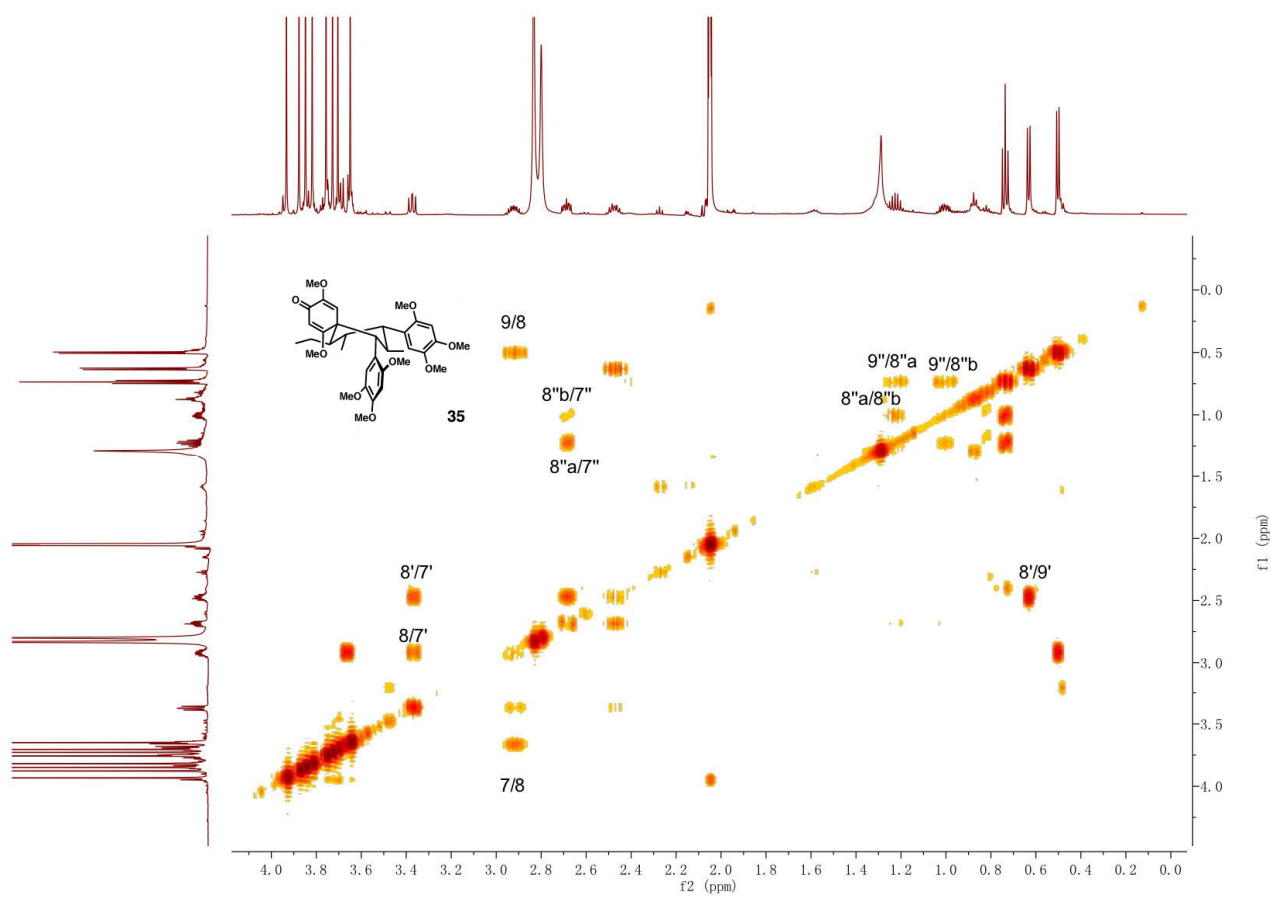

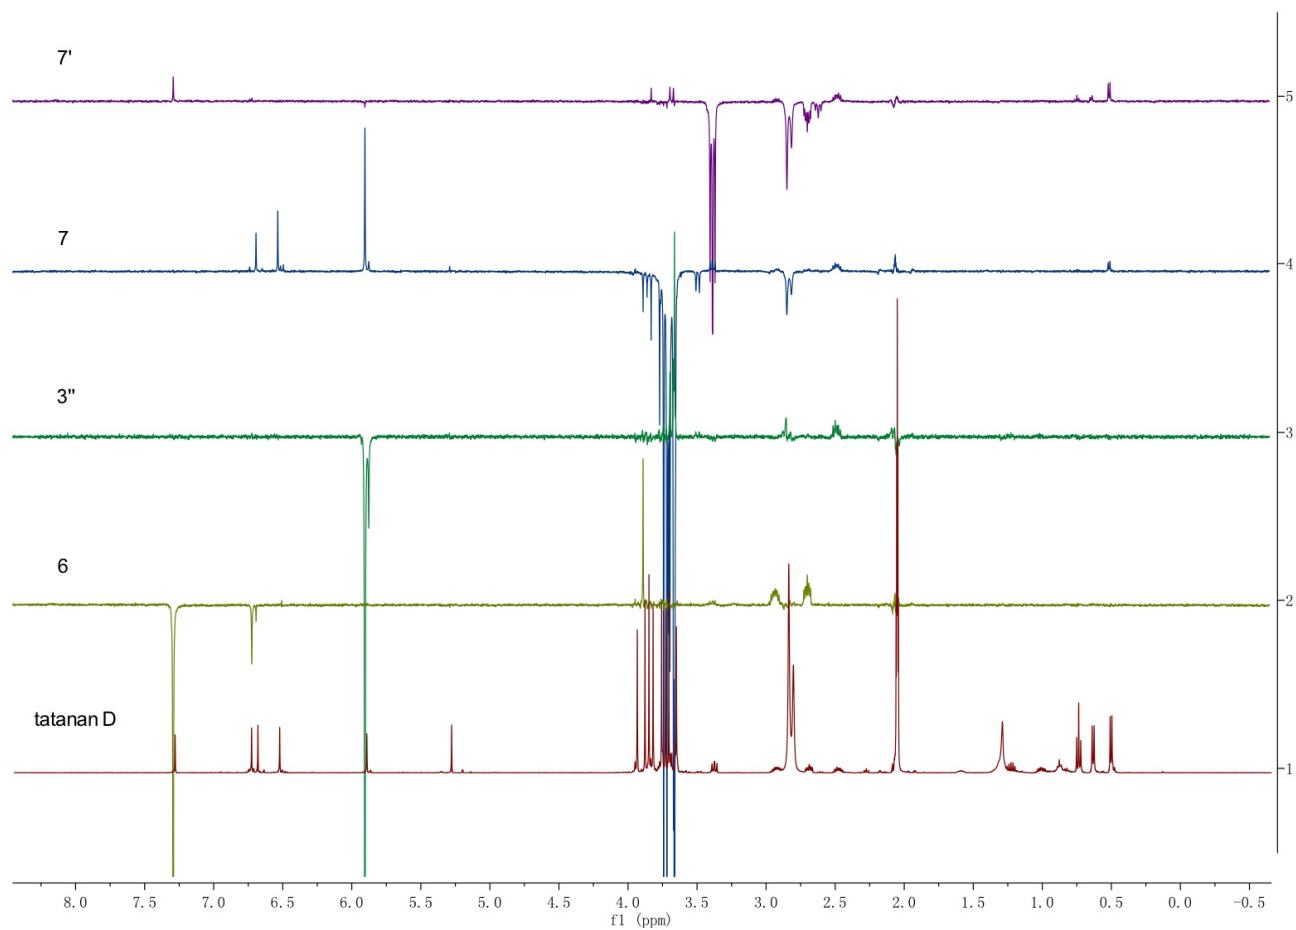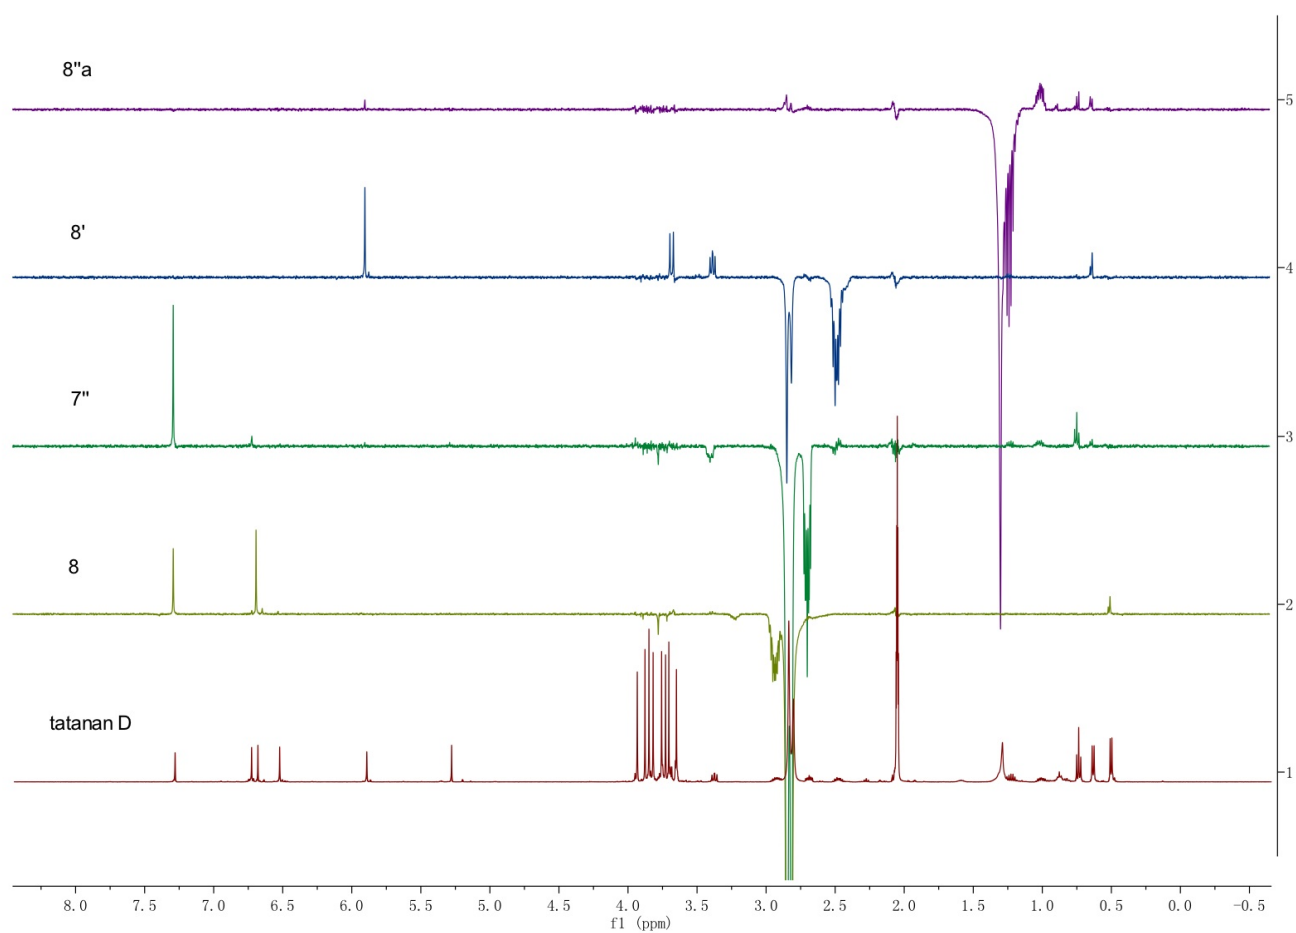NOE spectrum of **35** in CD<sub>3</sub>COCD<sub>3</sub> (500 MHz)

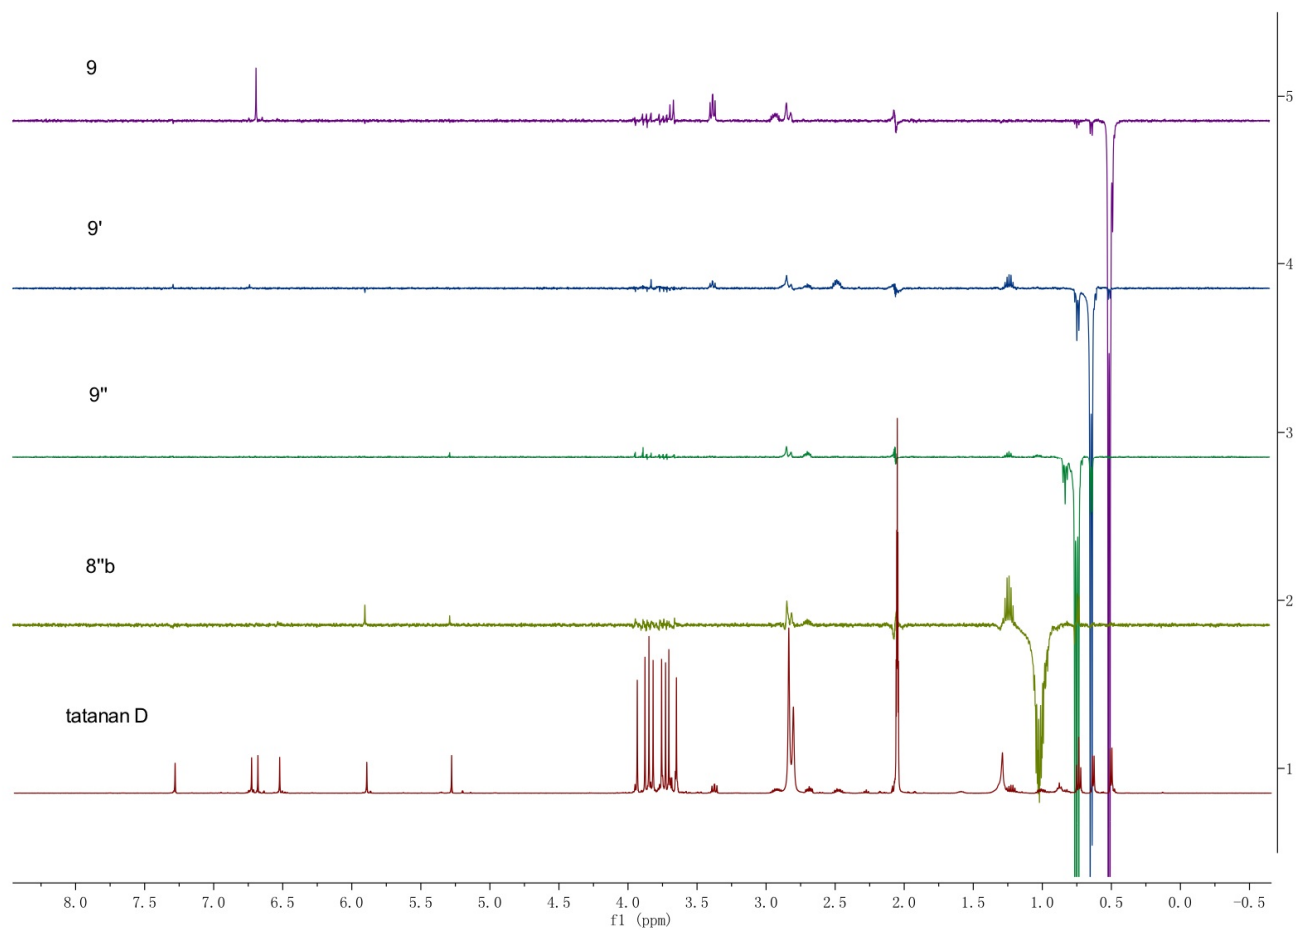NOE spectrum of **35** in  $\text{CD}_3\text{COCD}_3$  (500 MHz)



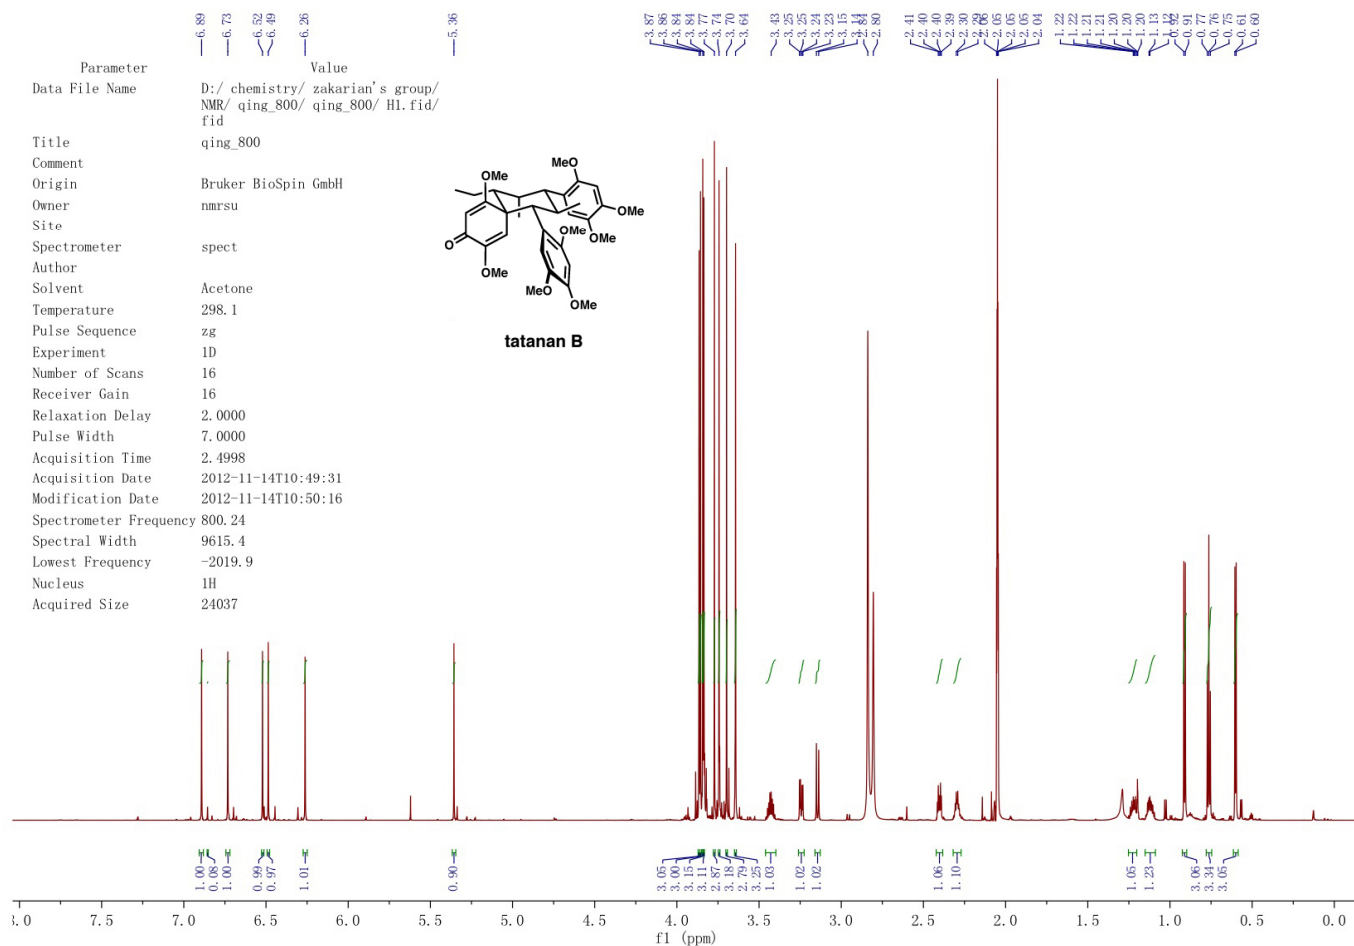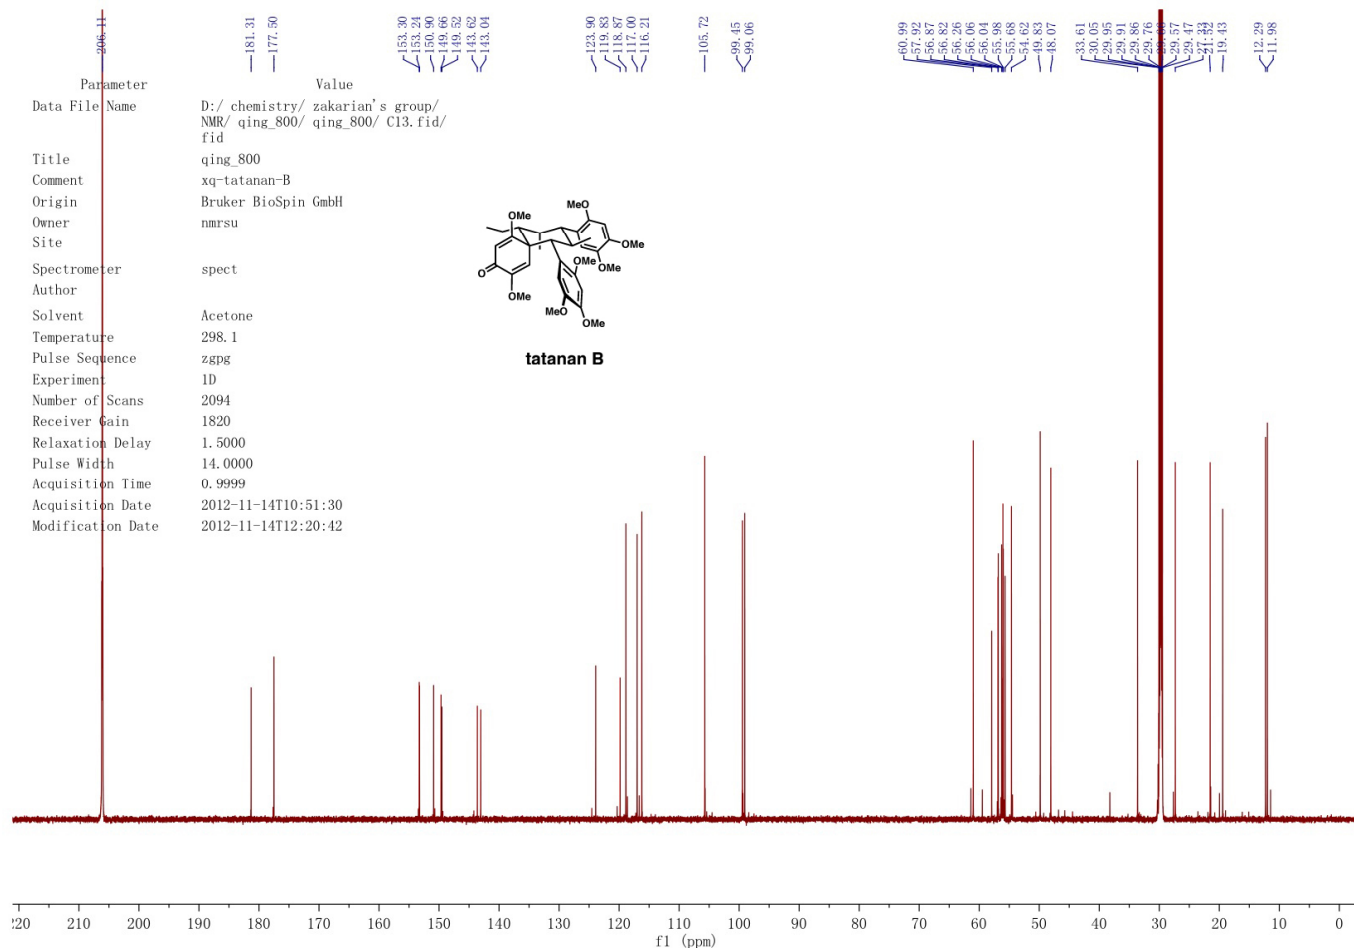

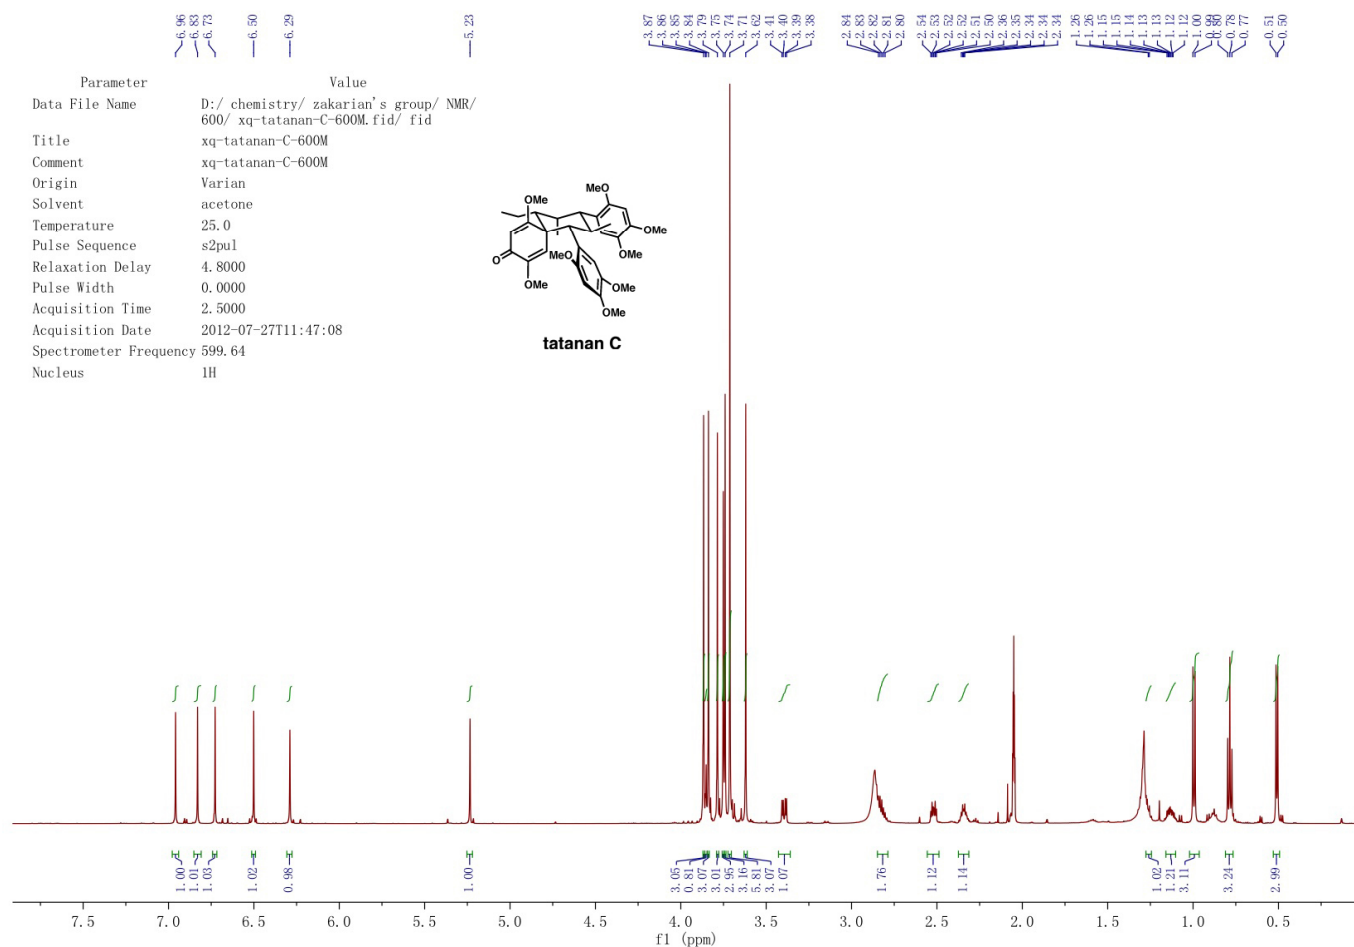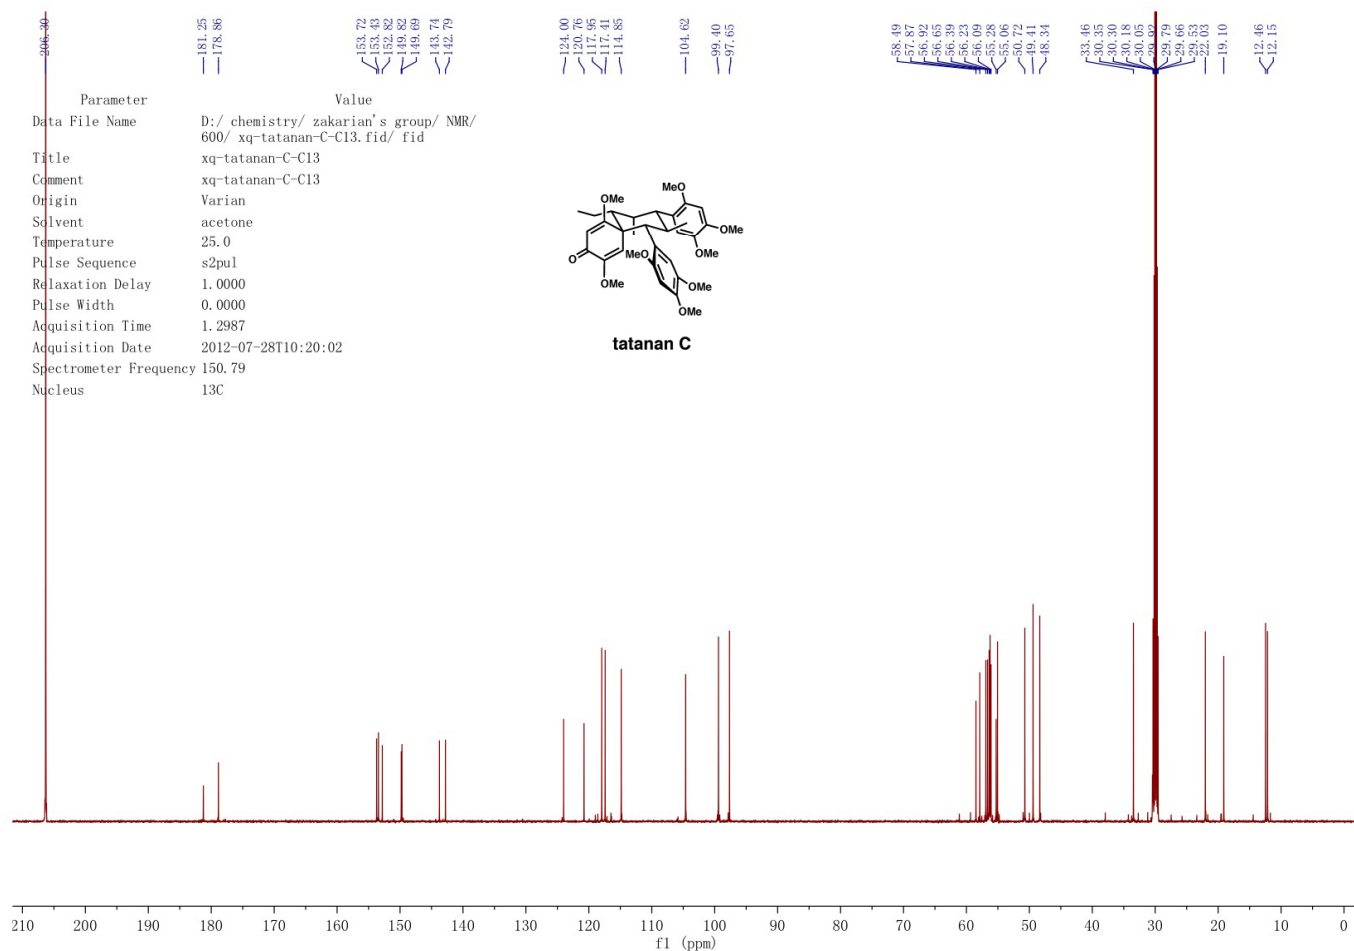

### ==== Shimadzu LCsolution Analysis Report ====

C:\LabSolutions\Data\Project1\XQ\xq-tatanan-prep05.lcd

xq-tatanan-prep  
ODS-AM 250mm\*20mm  
20ml/min 40% CH3CN in H2O  
2.5 ml in 50:50 CH3CN/H2O  
sampl injection  
Acquired by : Admin  
Sample Name : xq-tatanan-prep  
Sample ID : xq-tatanan-prep  
Vail # :  
Injection Volume : 2.5 uL  
Data File Name : xq-tatanan-prep05.lcd  
Method File Name : ath-YMC-Pack SIL, 250x30 mm, S-10 um, 12 nm.lcm  
Batch File Name :  
Report File Name : Default.lcr  
Data Acquired : 7/25/2012 10:15:04 AM  
Data Processed : 7/25/2012 2:09:21 PM

#### <Chromatogram>

C:\LabSolutions\Data\Project1\XQ\xq-tatanan-prep05.lcd

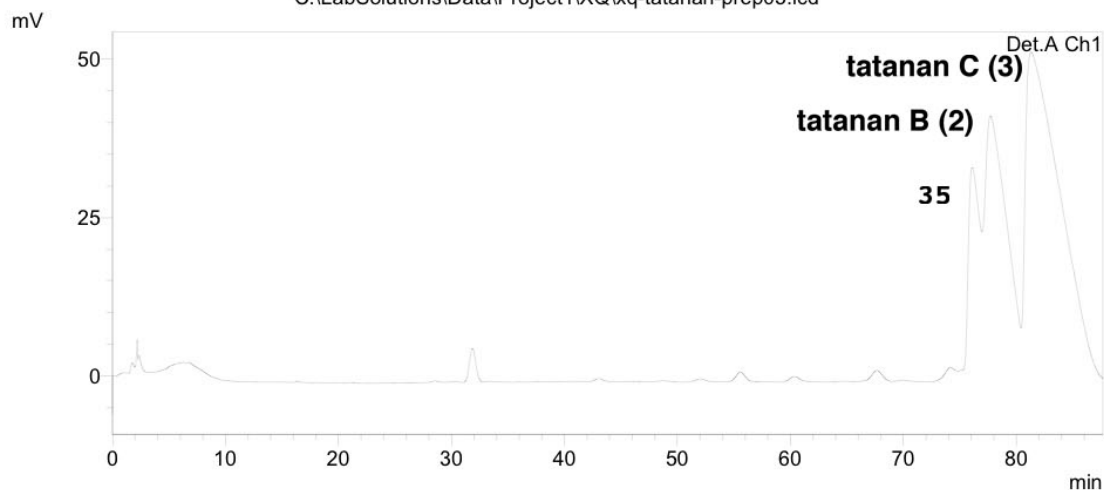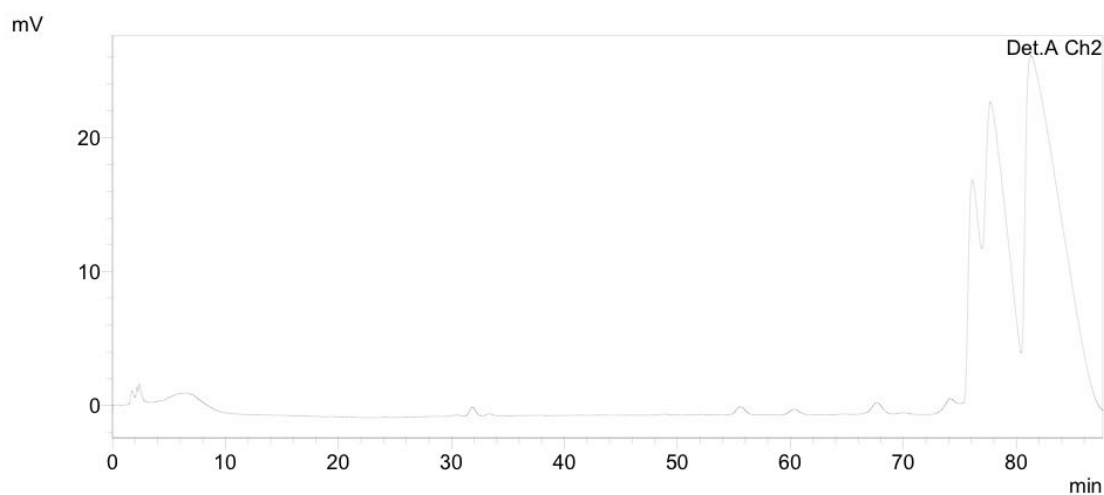

1 Det.A Ch1/215nm  
2 Det.A Ch2/254nm

C:\LabSolutions\Data\Project1\XQ\xq-tatanan-prep05.lcd
